# Supplementary material
Source: PubMed Central journal article supplement (PMC3612858)
Supplement: supp_blood-2012-12-471201_blood-2012-12-471201-1.pdf [file supp_blood-2012-12-471201_blood-2012-12-471201-1.pdf]

**Supplemental Figure 1 (related to Figure 1). Glucose expands *runx1*+ HSCs in a dose-and duration-dependent manner independent of vascular niche formation.**

(A) Increasing concentrations of glucose (0.5%, 1%, 5%) in the fish water exerted a dose-dependent enhancement in *runx1/cmyb* expression by *in situ* hybridization in zebrafish embryos at 36hpf (n≥45/tx).

(B) Duration (12 vs 24hrs) of glucose treatment (1%) (upper panels), but not timing during the onset of hematopoietic development from 12-36hpf, impacted the degree of enhancement in *runx1/cmyb* expression (n≥45/tx). Vascular development (lower panels), assessed by *fli/flk1* *in situ* hybridization remained grossly unchanged during all treatment windows (n≥100/tx).

(C) *In vivo* imaging of *fli:GFP* transgenic embryos confirmed normal development of the hematopoietic vascular niche after exposure to 1% glucose from 12-36hpf (n≥35/tx).

(D) qPCR quantification of vascular gene expression (*flk1*, *tie2*, *lmo2*, *ve-cadherin*) revealed significant changes in response to elevated glucose levels in genes highly expressed by both HSCs and endothelium (t-test, \*p<0.005, n=3).

(E) Exposure to glucose from 12-36hpf rescued *runx1/cmyb* expression in *silent heart* (*sih*<sup>-/-</sup>) mutant embryos (n≥40/tx).

(F) Morpholino (MO) knockdown of *troponin T type 2*, the gene causing the *silent heart* phenotype, confirmed that reductions in *runx1*, *cmyb*, and *CD41* expression were rescued by glucose exposure (ANOVA, p<0.05, n=3).

**Supplemental Figure 2 (related to Figure 1). Glucose specifically enhances cell proliferation in the AGM.**

Zebrafish embryos were exposed to 1% D-glucose from 12-36hpf.

(A) Cell proliferation, assessed by whole-mount BrdU staining, was enhanced in response to glucose exposure (22↑/31).

(B) Exposure of *in vivo* proliferation reporter transgenic zebrafish embryos Tg(EF1:mKO2-zCdt1(1/190))rw0405b; Tg(EF1:mAG-zGem(1/100))rw0410h revealed increased cells in S/G2/M phase (green) in the AGM region ( $n \geq 50$ /tx).

(C) Glucose exposure caused a significant increase in the number of BrdU-positive cells in the trunk/tail region encompassing the AGM (t-test,  $*p < 0.001$ ,  $n = 3$ ).

(D) FACS quantification of cell cycle distribution after propidium iodide incubation confirmed a significant increase in cells in G2 after glucose exposure compared to controls (t-test,  $*p = 0.014$ ,  $n = 20$ ).

(E) Hemocytometer counts of whole embryo disaggregates at 36hpf demonstrated no significant change in total cell number after glucose exposure from 12-36hpf ( $n = 6 \times 3$  replicates, t-test,  $p = \text{NS}$ ,  $n = 6 \times 3$  replicates).

(F) Total protein analysis of disaggregated embryos at 36hpf showed no significant differences after exposure to 1% glucose from 12-36hpf compared to controls (t-test,  $p = \text{NS}$ ,  $n = 3$ ).

(G) Evaluation of the impact of glucose on other mesodermal cell types and germ layers by *in situ* hybridization at 36hpf for *MHC* (muscle), *pax2* (kidney), *cmlc* (heart), *foxA3* (primitive endoderm), and *huc* (Hu antigen C, nervous system) did not reveal any gross morphological changes, confirming the specificity of the effects on the hematopoietic system at this developmental stage ( $n \geq 25$ /tx).

**Supplemental Figure 3 (related to Figure 2). Glucose enhances definitive HSC formation and function.**

(A) qPCR analysis for HSC-relevant genes *runx1*, *cmyb*, and *CD41* revealed accelerated and increased induction compared to controls in response to glucose exposure during the onset of definitive hematopoietic development from 18-36hpf (t-test vs 18hpf,  $p < 0.05$ ,  $n = 3$ ).

(B) Loss of *runx1* in *runx1*<sup>-/-</sup> mutant zebrafish caused severe impairment of *cmyb* expression by *in situ* hybridization at 36hpf, which could not be rescued by glucose, suggesting *runx1* is required to mediate the effect of glucose on HSCs ( $n \geq 15$ /tx).

(C) Confirmation and quantitation by qPCR analysis of *runx1*-morphants showed the glucose-induced increase in *cmyb* expression is dependent on *runx1* (ANOVA,  $p < 0.05$ ,  $n = 3$ ).

(D) Detection of donor *CD41:eGFP* cells by microscopy at 3 weeks after transplantation into irradiated adult WT recipients revealed increased fluorescence in recipient fish of AGM cells from glucose-treated embryos (three representative GFP+ samples shown/tx).

(E) FACS analysis of whole kidney marrow (KM) and peripheral blood (PB) in recipients of AGM cells from *CD41:eGFP* embryos at 3 weeks after transplantation revealed increased engraftment rates (GFP+ cells  $> 0.01\%$ ; Fisher's exact test,  $*p < 0.05$ ).

(F) Replicate experiments confirmed the enhanced engraftment of *CD41:eGFP* cells in recipients of glucose-exposed AGM cells at 3 weeks post transplantation, as determined by fluorescence microscopy for *CD41:eGFP* (Fisher's exact (one-tailed),  $*p < 0.05$ ,  $**p < 0.002$ ,  $n \geq 10$ /tx).

(G) PB FACS analysis for *CD45:dsRed* in *CD41*<sup>+</sup> engrafted recipients of control and

glucose-treated AGM cells from *CD41:eGFP*; *CD45:dsRed* donor embryos shows equal potential for multilineage engraftment (FSC/SSC).

**Supplemental Figure 4 (related to Figure 2). Glucose exposure enhances hematopoiesis throughout development**

(A-C) Embryos were exposed to glucose from 12-24hpf, and effects on primitive hematopoiesis were assessed (n $\geq$ 35/tx).

(A,B) Glucose exposure increased cell number in transgenic reporters for primitive hematopoiesis, *scl:eGFP*, *gata1:dsred*, and *globin:eGFP* at 24hpf as shown by fluorescence microscopy and (B) FACS (t-test, *scl*, *gata1*: \*p<0.001, *globin*: \*\*p<0.05, n=3-9).

(C) qPCR quantification in 36hpf embryos confirmed significantly enhanced gene expression following glucose exposure (t-test, *scl*, *globin*: \*p<0.001; *gata1*: \*\*p=0.02, n=3).

(D) Glucose exposure for 24 hrs from 12-36hpf increased *CD41*<sup>+</sup> cells in the CHT at 72 hpf or the kidney at 144 hpf in *CD41:eGFP* transgenic zebrafish by determined by fluorescence microscopy (n $\geq$ 35/tx).

(E) FACS quantification of *CD41:eGFP*<sup>+</sup> cells (from embryos in D) confirmed the sustained elevation of HSCs after glucose exposure up to 144 hpf (t-test, \*p<0.05, n=6).

(F) qPCR for the expression of lineage-specific genes (*lysc*, *mpo*, *rag2*, *lck*) confirmed the lack of significant impact on lineage differentiation after glucose exposure from 12-36hpf (t-test, p=NS, n=3).

(G) FACS analysis of lineage-specific reporter embryos (*lysc:dsRed*, *mpo:GFP*,

*rag2:GFP*) at 72 and 144 hpf revealed no significant changes in % distribution between untreated and embryos exposed to glucose from 12-36hpf (t-test, p=NS, n=8).

(H) Whole embryo cell counts indicated a significant and persistent increase in total embryo cell number during development after initial glucose exposure from 12-36hpf (t-test, 72 hpf: 30,366±777 vs 34,200±600, p=0.02, n=3; 144 hpf: 43,066±1358 vs 46,700±1735, p=0.046, n=3).

(I) Calculations of absolute numbers of differentiated myeloid cells demonstrate glucose exposure significantly increases total hematopoietic cells at 72 and 144 following exposure from 12-36hpf (t-test, \*p<0.05, n=3).

(J) Kidney marrow FACS analysis of zebrafish exposed to glucose from 12-36hpf and analyzed at 1 month post treatment revealed no alterations in lineage distributions and reestablishment of normal HSC number (t-test, p=NS, n=9).

(K) FACS analysis of *CD41:eGFP* embryos at 72 and 144hpf revealed continued susceptibility to the effects of transient (24hr) glucose exposure even at larval stages (t-test, \*p<0.05, n=10).

(L) Glucose exposure significantly increased the percentage of hematopoietic precursors in kidney marrow, as assessed by FACS, at day 10 post irradiation injury of adult zebrafish (t-test, \*p<0.001, n=10).

**Supplemental Figure 5 (related to Figure 5). Reactive oxygen species, but not insulin, play a major role in HSC formation during development.**

(A) Prior to pancreas formation and function at 36hpf, treatment with the beta-cell toxin streptozocin had no effect on *insulin* expression in control or glucose-exposed embryos

(n≥40/tx).

(B) Exposure to oxidants PTU (0.003%), BSO (500μM), and paraquat (500μM) from 10-36 hpf enhanced *runx1/cmyb* expression at 36 hpf (n≥40/tx).

(C) Antioxidants and ROS inhibitors vitamin C (750μM), Euk134 (500μM), and MitoQ (10μM) decreased *runx1/cmyb* expression and blocked the effects of glucose (n≥30/tx).

(D) Use of an intravital H<sub>2</sub>O<sub>2</sub> sensor (green), Peroxy-Fluor 2 (PF2), in *lmo2:dsRed* transgenic embryos demonstrated increased H<sub>2</sub>O<sub>2</sub> production in response to glucose exposure. This effect was completely blocked by the mitochondrial-specific H<sub>2</sub>O<sub>2</sub>/O<sub>2</sub><sup>-</sup> quencher MitoQ (10μM) (n≥20/tx from 3 independent experiments).

**Supplemental Figure 6 (related to Figure 6). Transcriptional analysis of glucose-treated embryos reveals changes in Hif1α signaling.**

(A-D) Microarray analysis was conducted on RNA isolated from pooled cohorts of whole embryos exposed to 1% glucose from 12-36 hpf compared to untreated sibling controls (n=20).

(A) Ingenuity pathway analysis (IPA) revealed that the Top Canonical Pathway significantly regulated by glucose exposure is “Hif1α signaling”, as determined by examination of all regulated genes (significant up- or down-regulation), as well as the cohort of genes with upregulated expression alone.

(B) IPA demonstrated “Hematological System and Function and Development”, “Embryonic Development” and “Cardiovascular System Development and Function” were amongst the Top IPA Associated Network Functions based on total gene expression (up and down) influenced by glucose exposure.

(C) Hematological associated networks, such as “Immunological Disease”, “Inflammatory Response”, and “Hematological Disease” were amongst the Top IPA Biological Functions associated with glucose elevation based on the analysis of total up- and down-regulated genes, or those up-regulated alone following glucose exposure.

(D) Connectivity maps of glucose-regulated genes illustrate the node associated with Hif1 $\alpha$ , as well as branches indicative of metabolism, proliferation, erythropoiesis and vasculogenesis.

**Supplemental Figure 7 (related to Figure 7). Hif1 $\alpha$  activity is required to mediate the effects of glucose metabolism on HSCs.**

(A) *hif1a-like* expression, visualized in the tail region of the zebrafish embryo by *in situ* hybridization at 36hpf, was enhanced following glucose exposure from 12-36hpf (n $\geq$ 25/tx).

(B) qPCR revealed upregulation of classical hif1 $\alpha$  metabolic gene targets relevant to glucose transport and glycolysis after exposure to glucose (t-test, \*p<0.05, n=3)

(C) Expression of the glucose transporter *glut1*, a classical transcriptional target of hif1 $\alpha$ , was increased at 36hpf, following exposure to glucose (n $\geq$ 25/tx).

(D) Quantitative analysis of fluorescence microscopy images of *cmyb:eGFP;lmo2:dsRed* reporter embryos revealed the positive effect of glucose exposure on HSCs could be abrogated by induction of dominant-negative (dn) *hif1a* (t-test, \*p<0.001 vs control, \*\*p<0.001 vs glucose, n=5).

(E) The increase in *runx1*<sup>+</sup> cells caused by glucose in a *runx1:eGFP* reporter fish as detected by fluorescence microscopy at 36hpf was abolished by expression of *dnhif1a* (n≥20/tx).

(F) O-dianisidine staining at 36hpf revealed the enhancement in erythrocyte formation mediated by glucose was blocked after induction of *dnhif1a* (n≥25/tx).

(G) The effect of glucose exposure on *runx1/cmyb* expression in the AGM at 36hpf could not be fully abolished by MO-mediated knockdown of the *hif1α* target *vegfaa* (n≥45/tx).



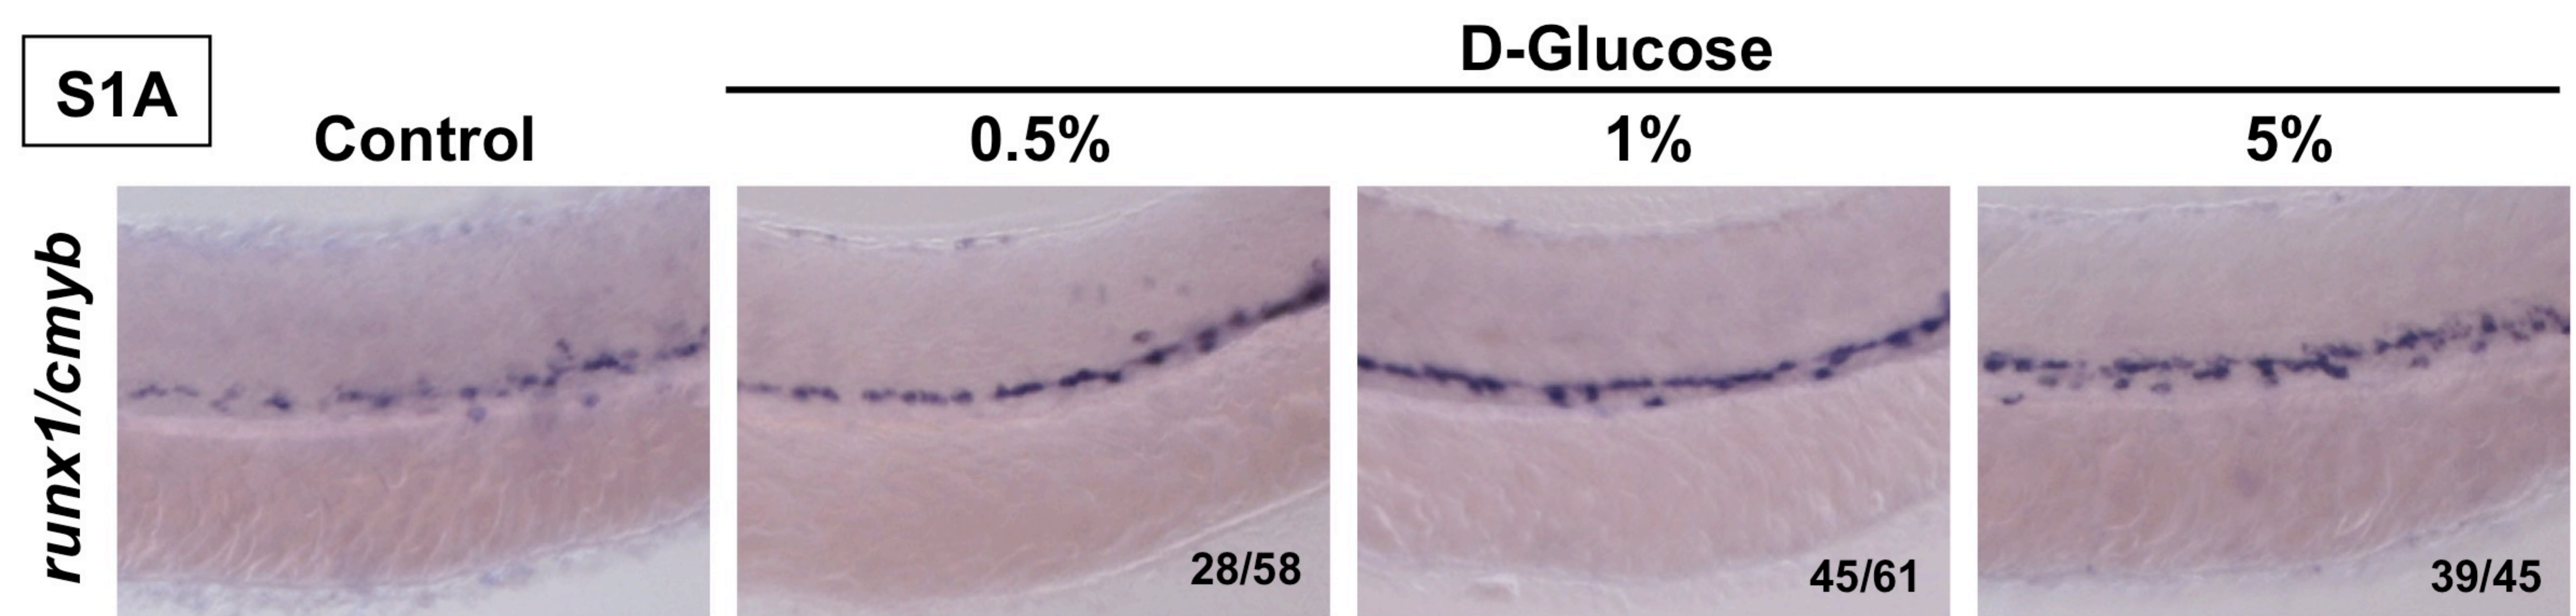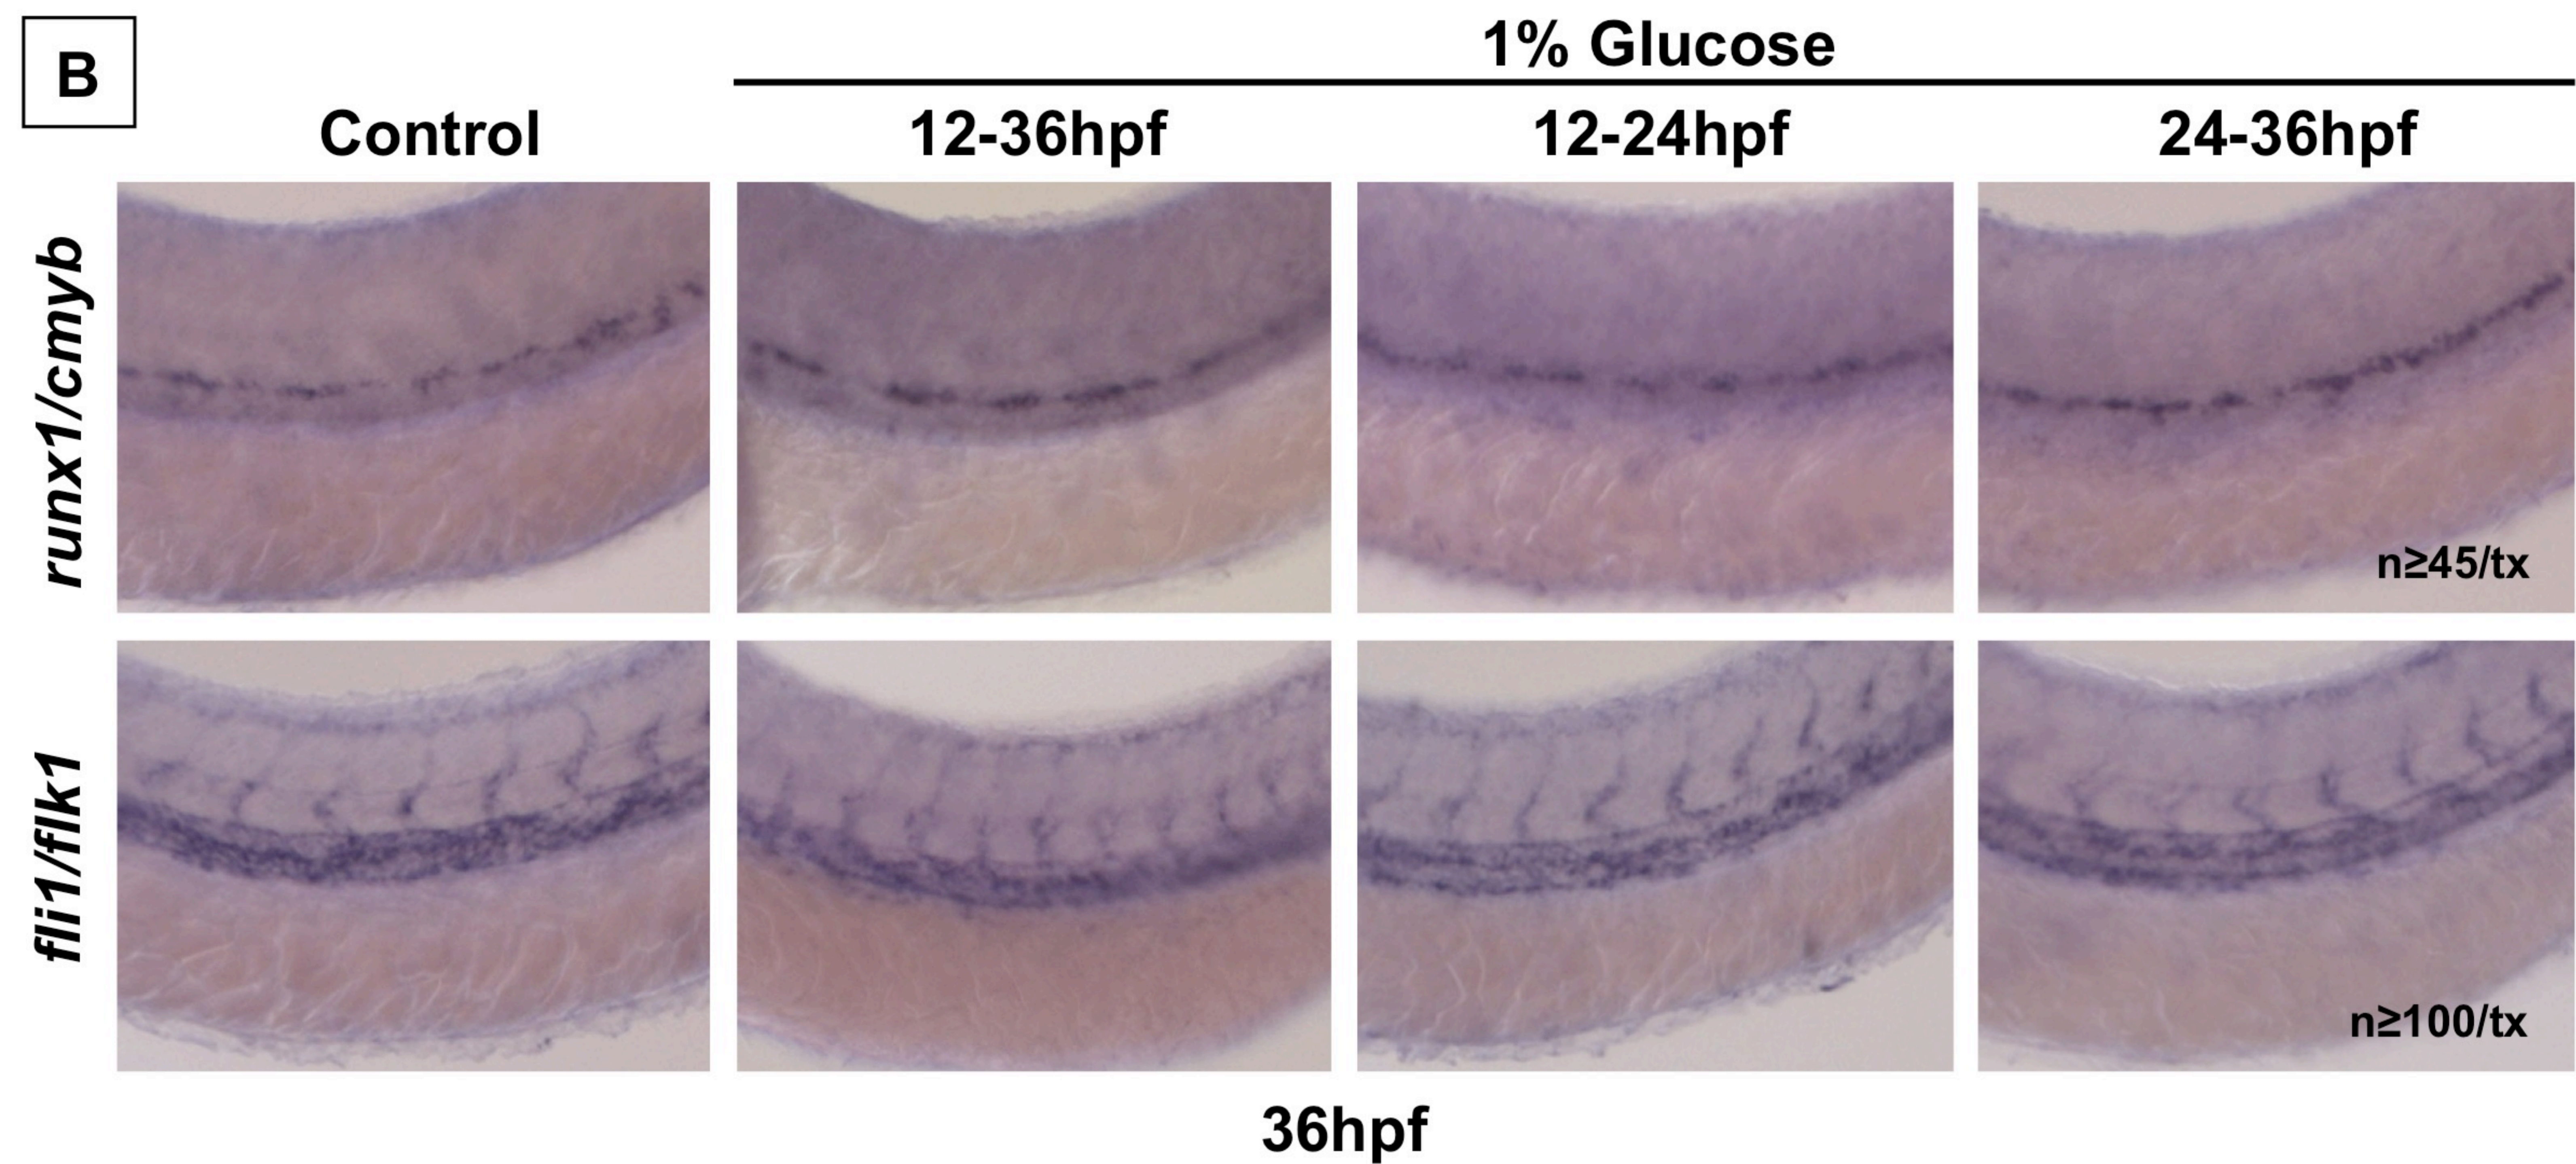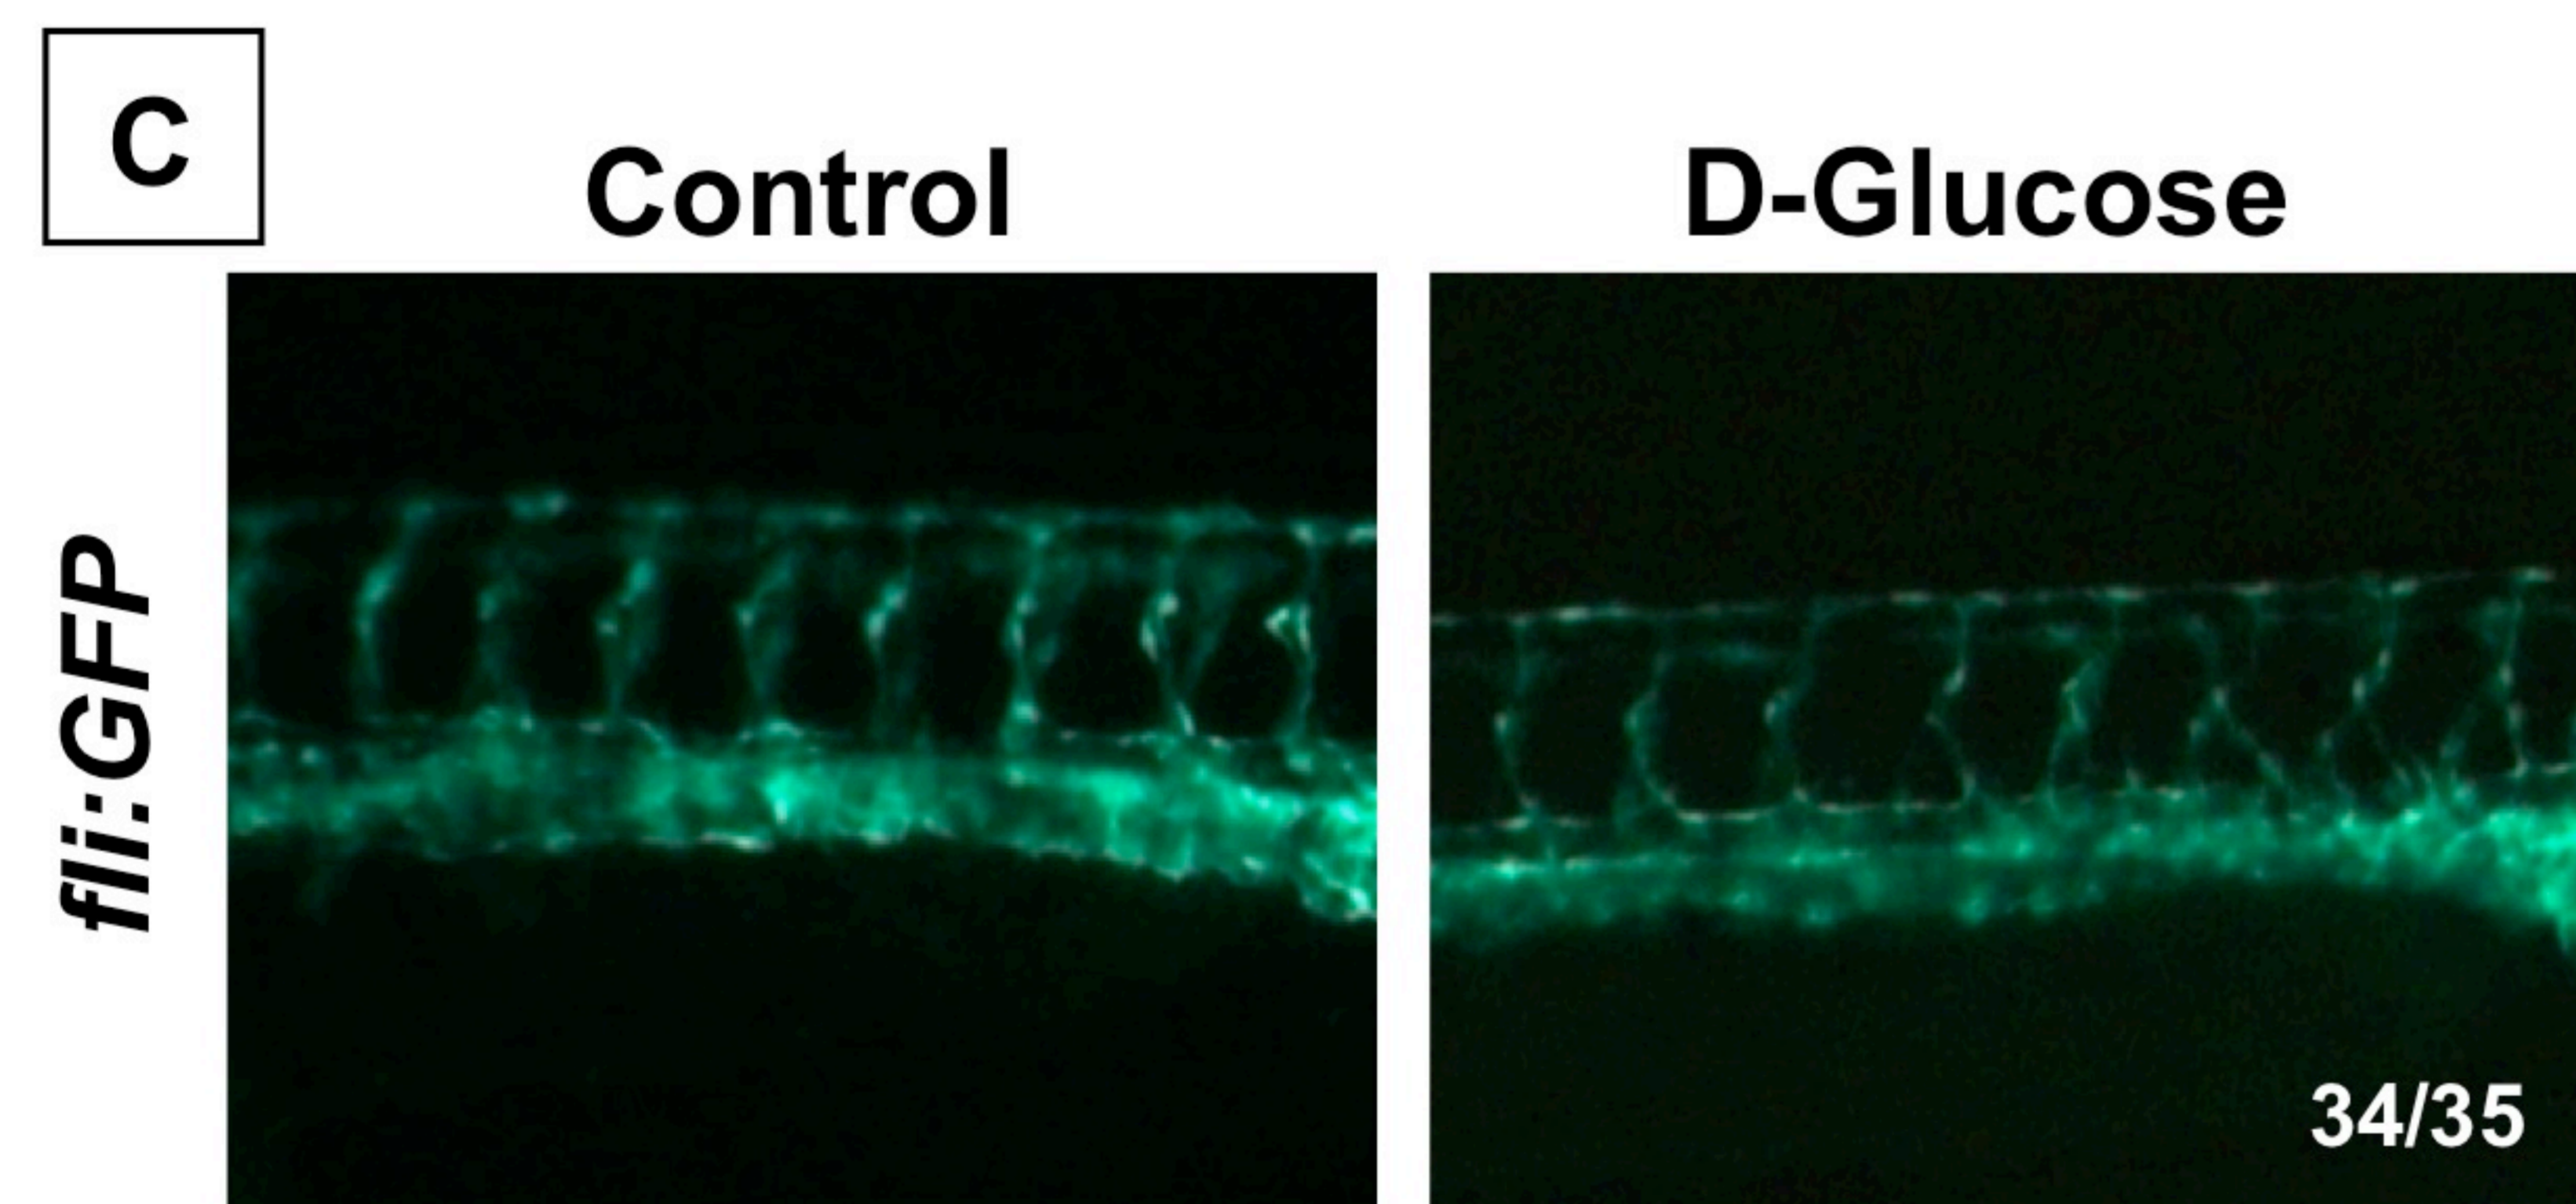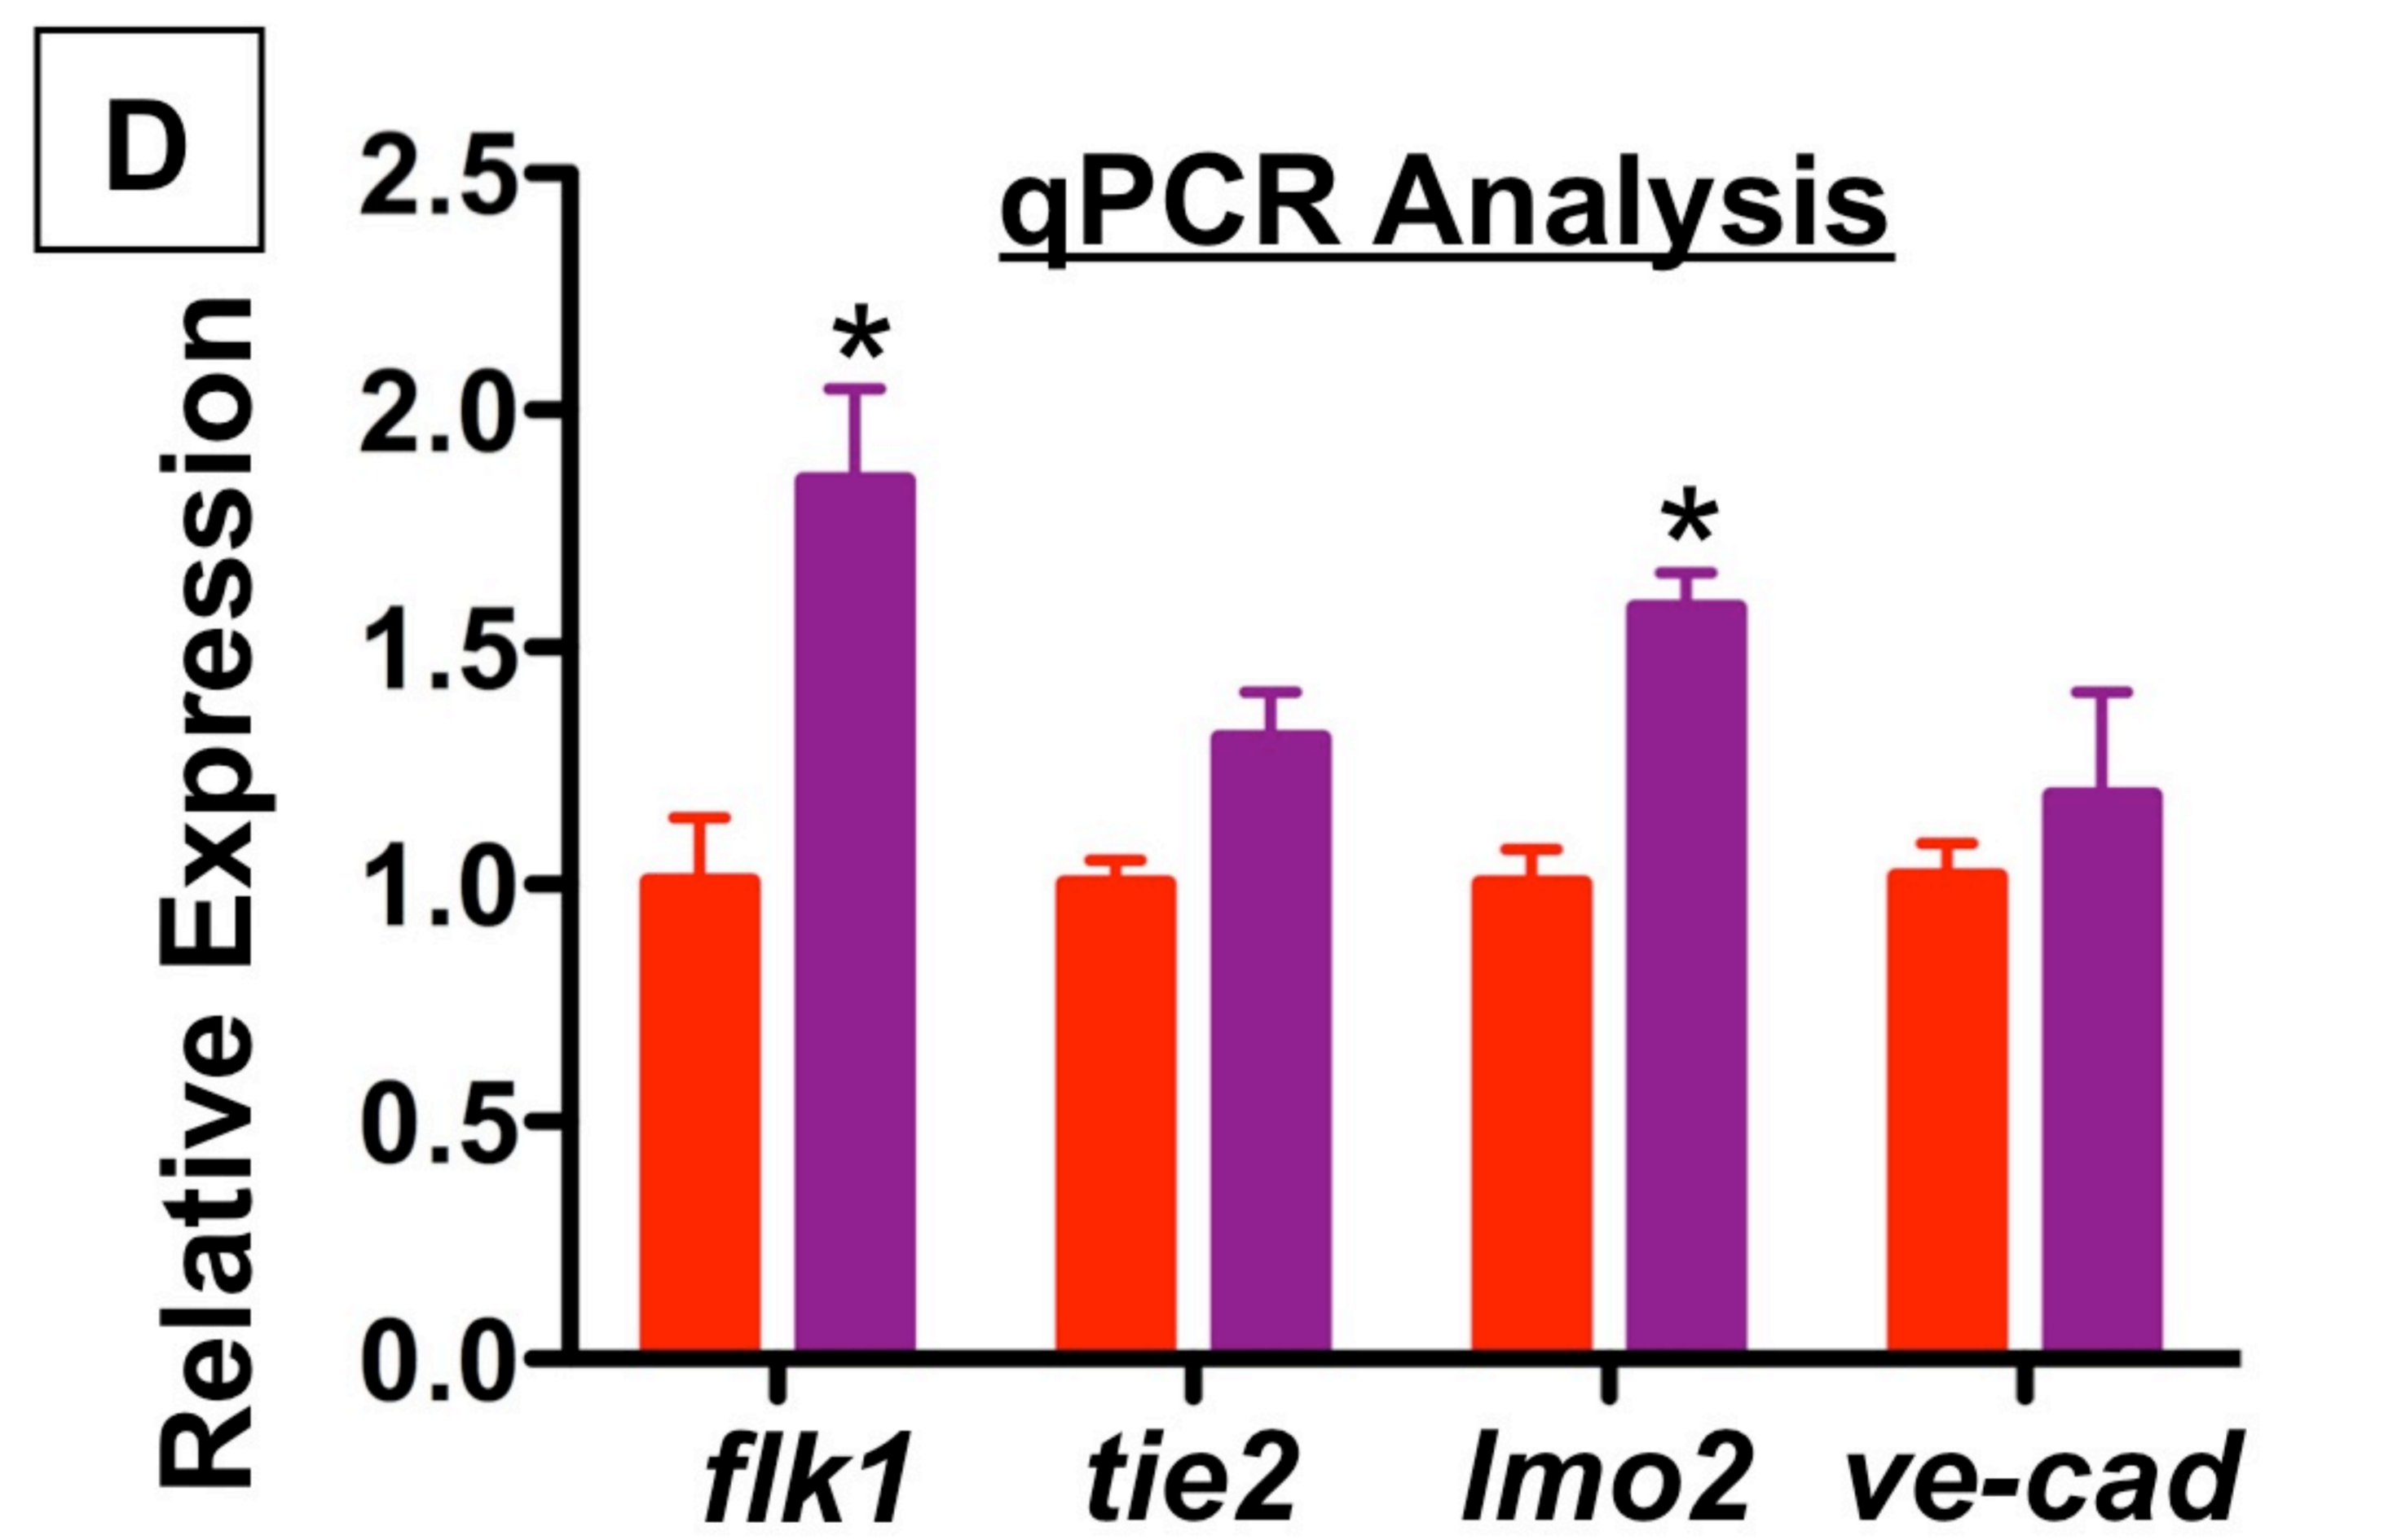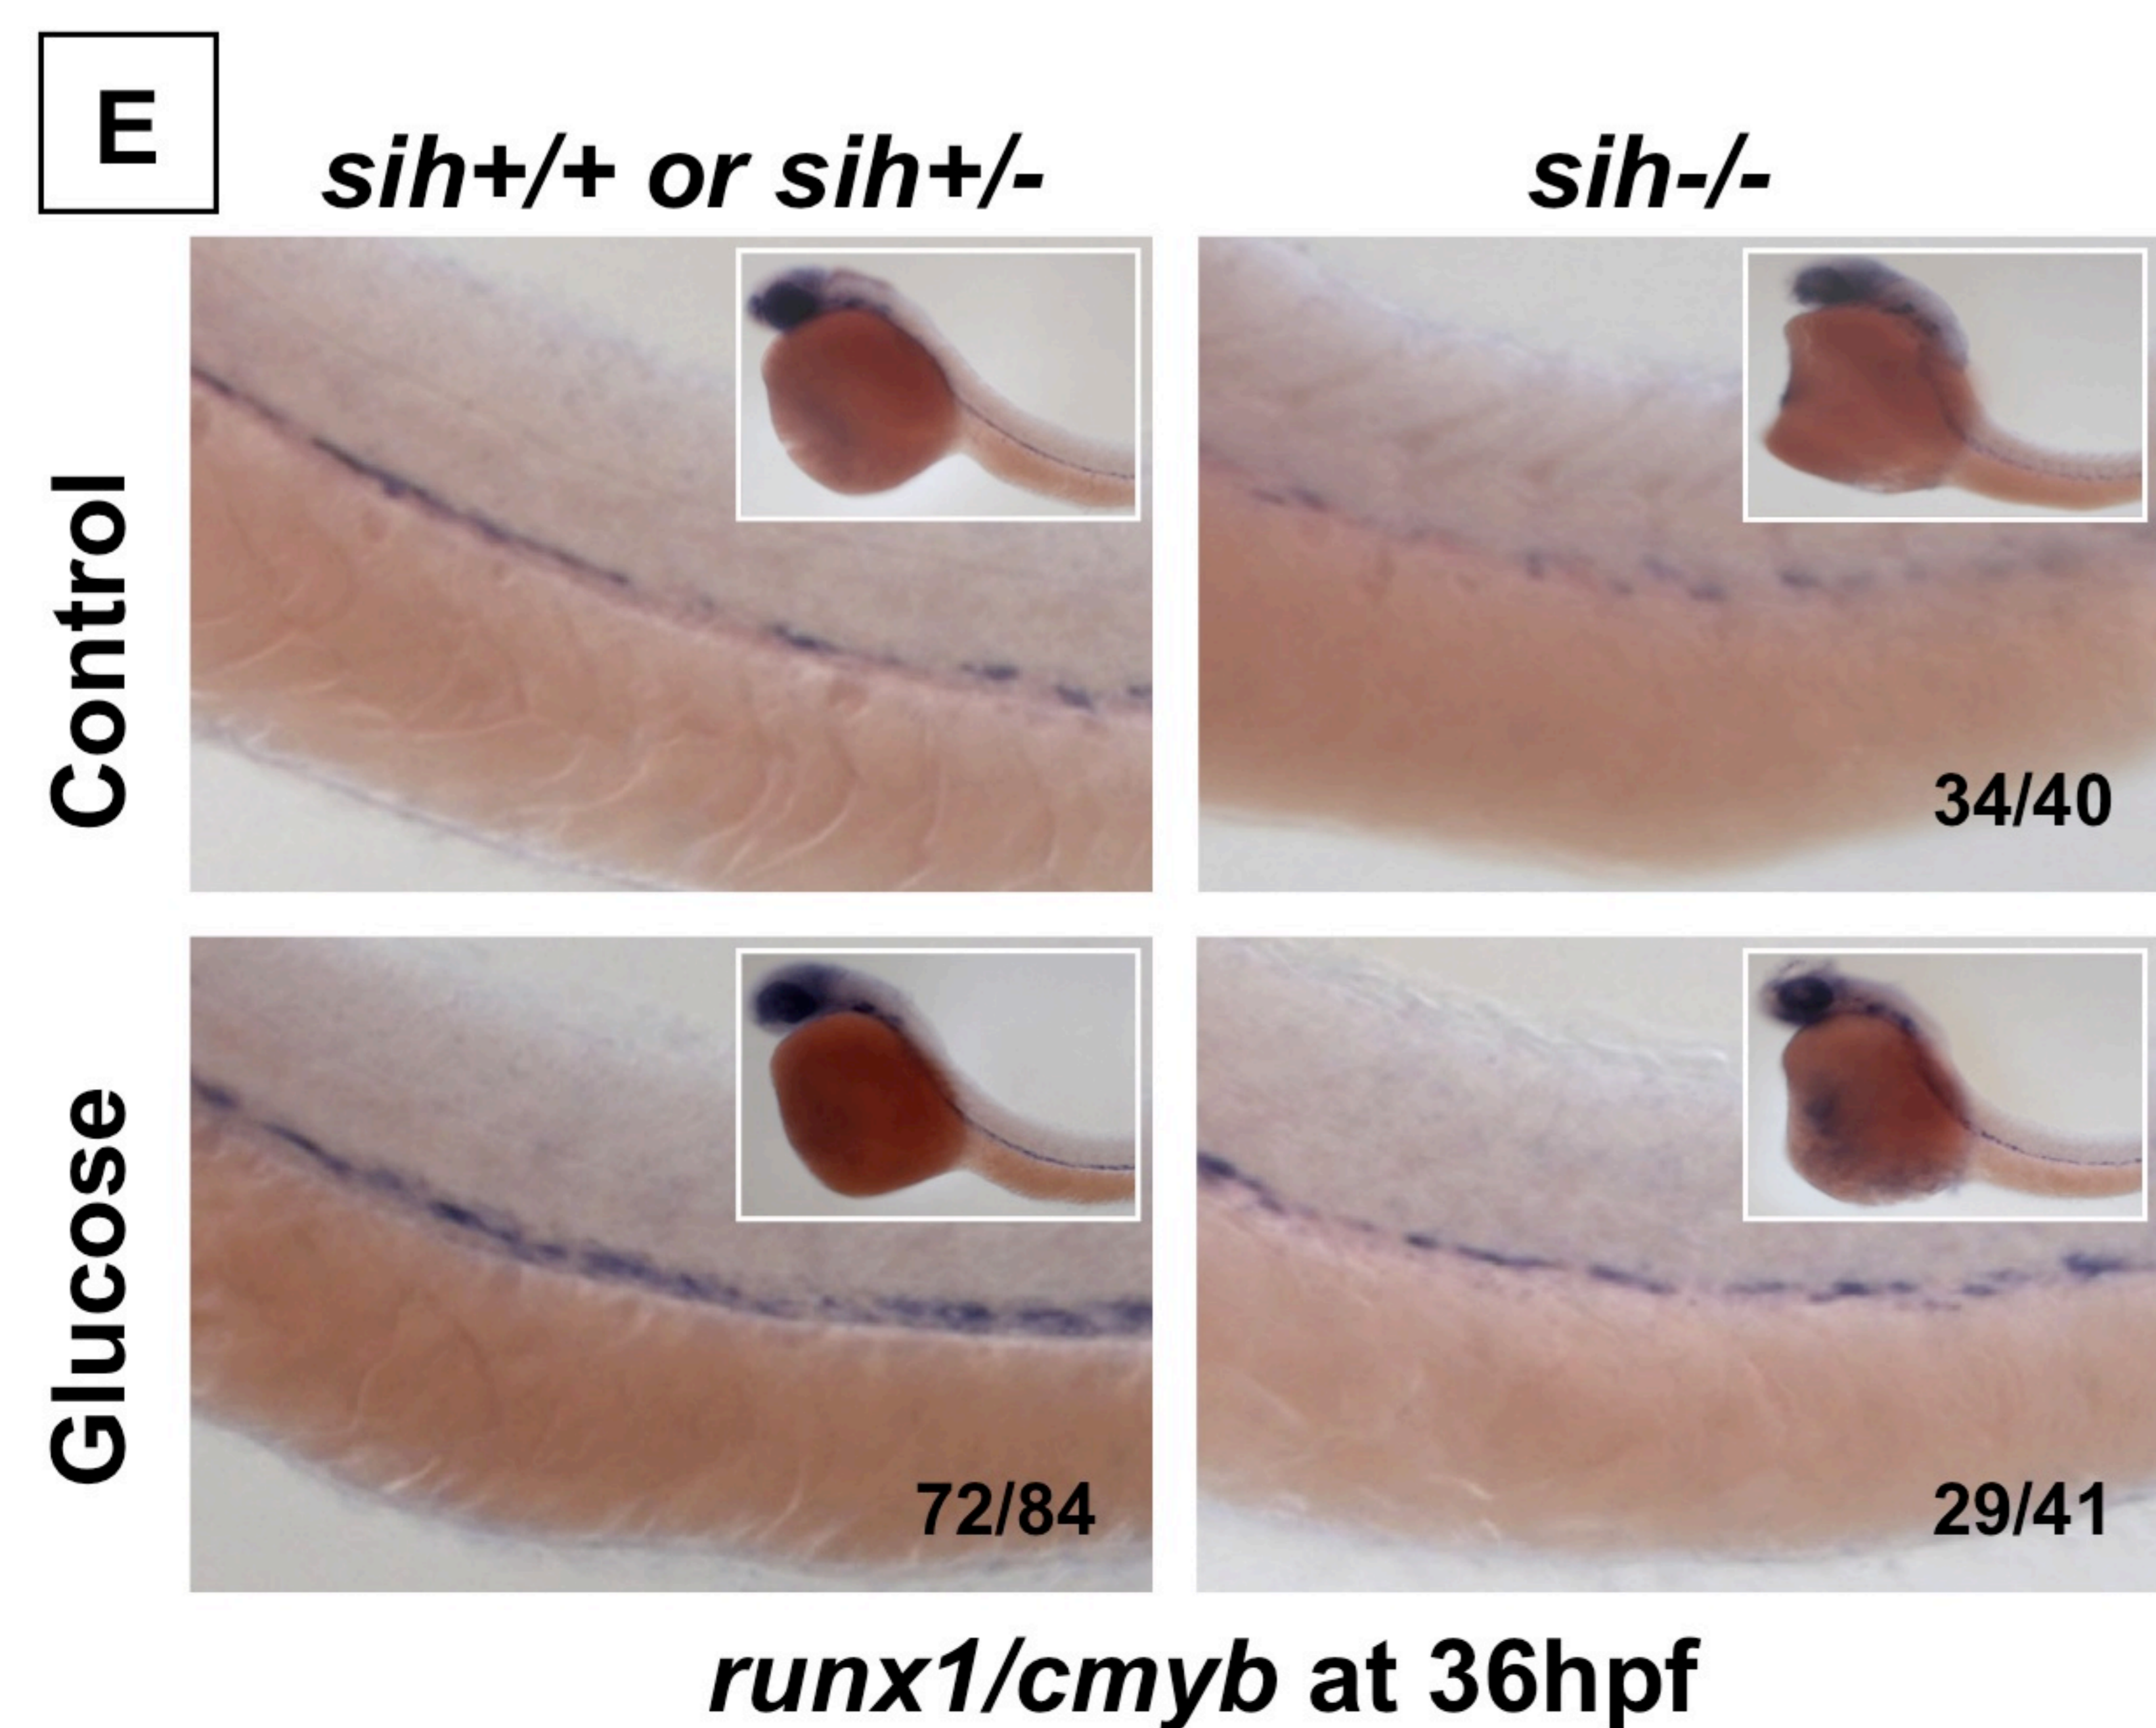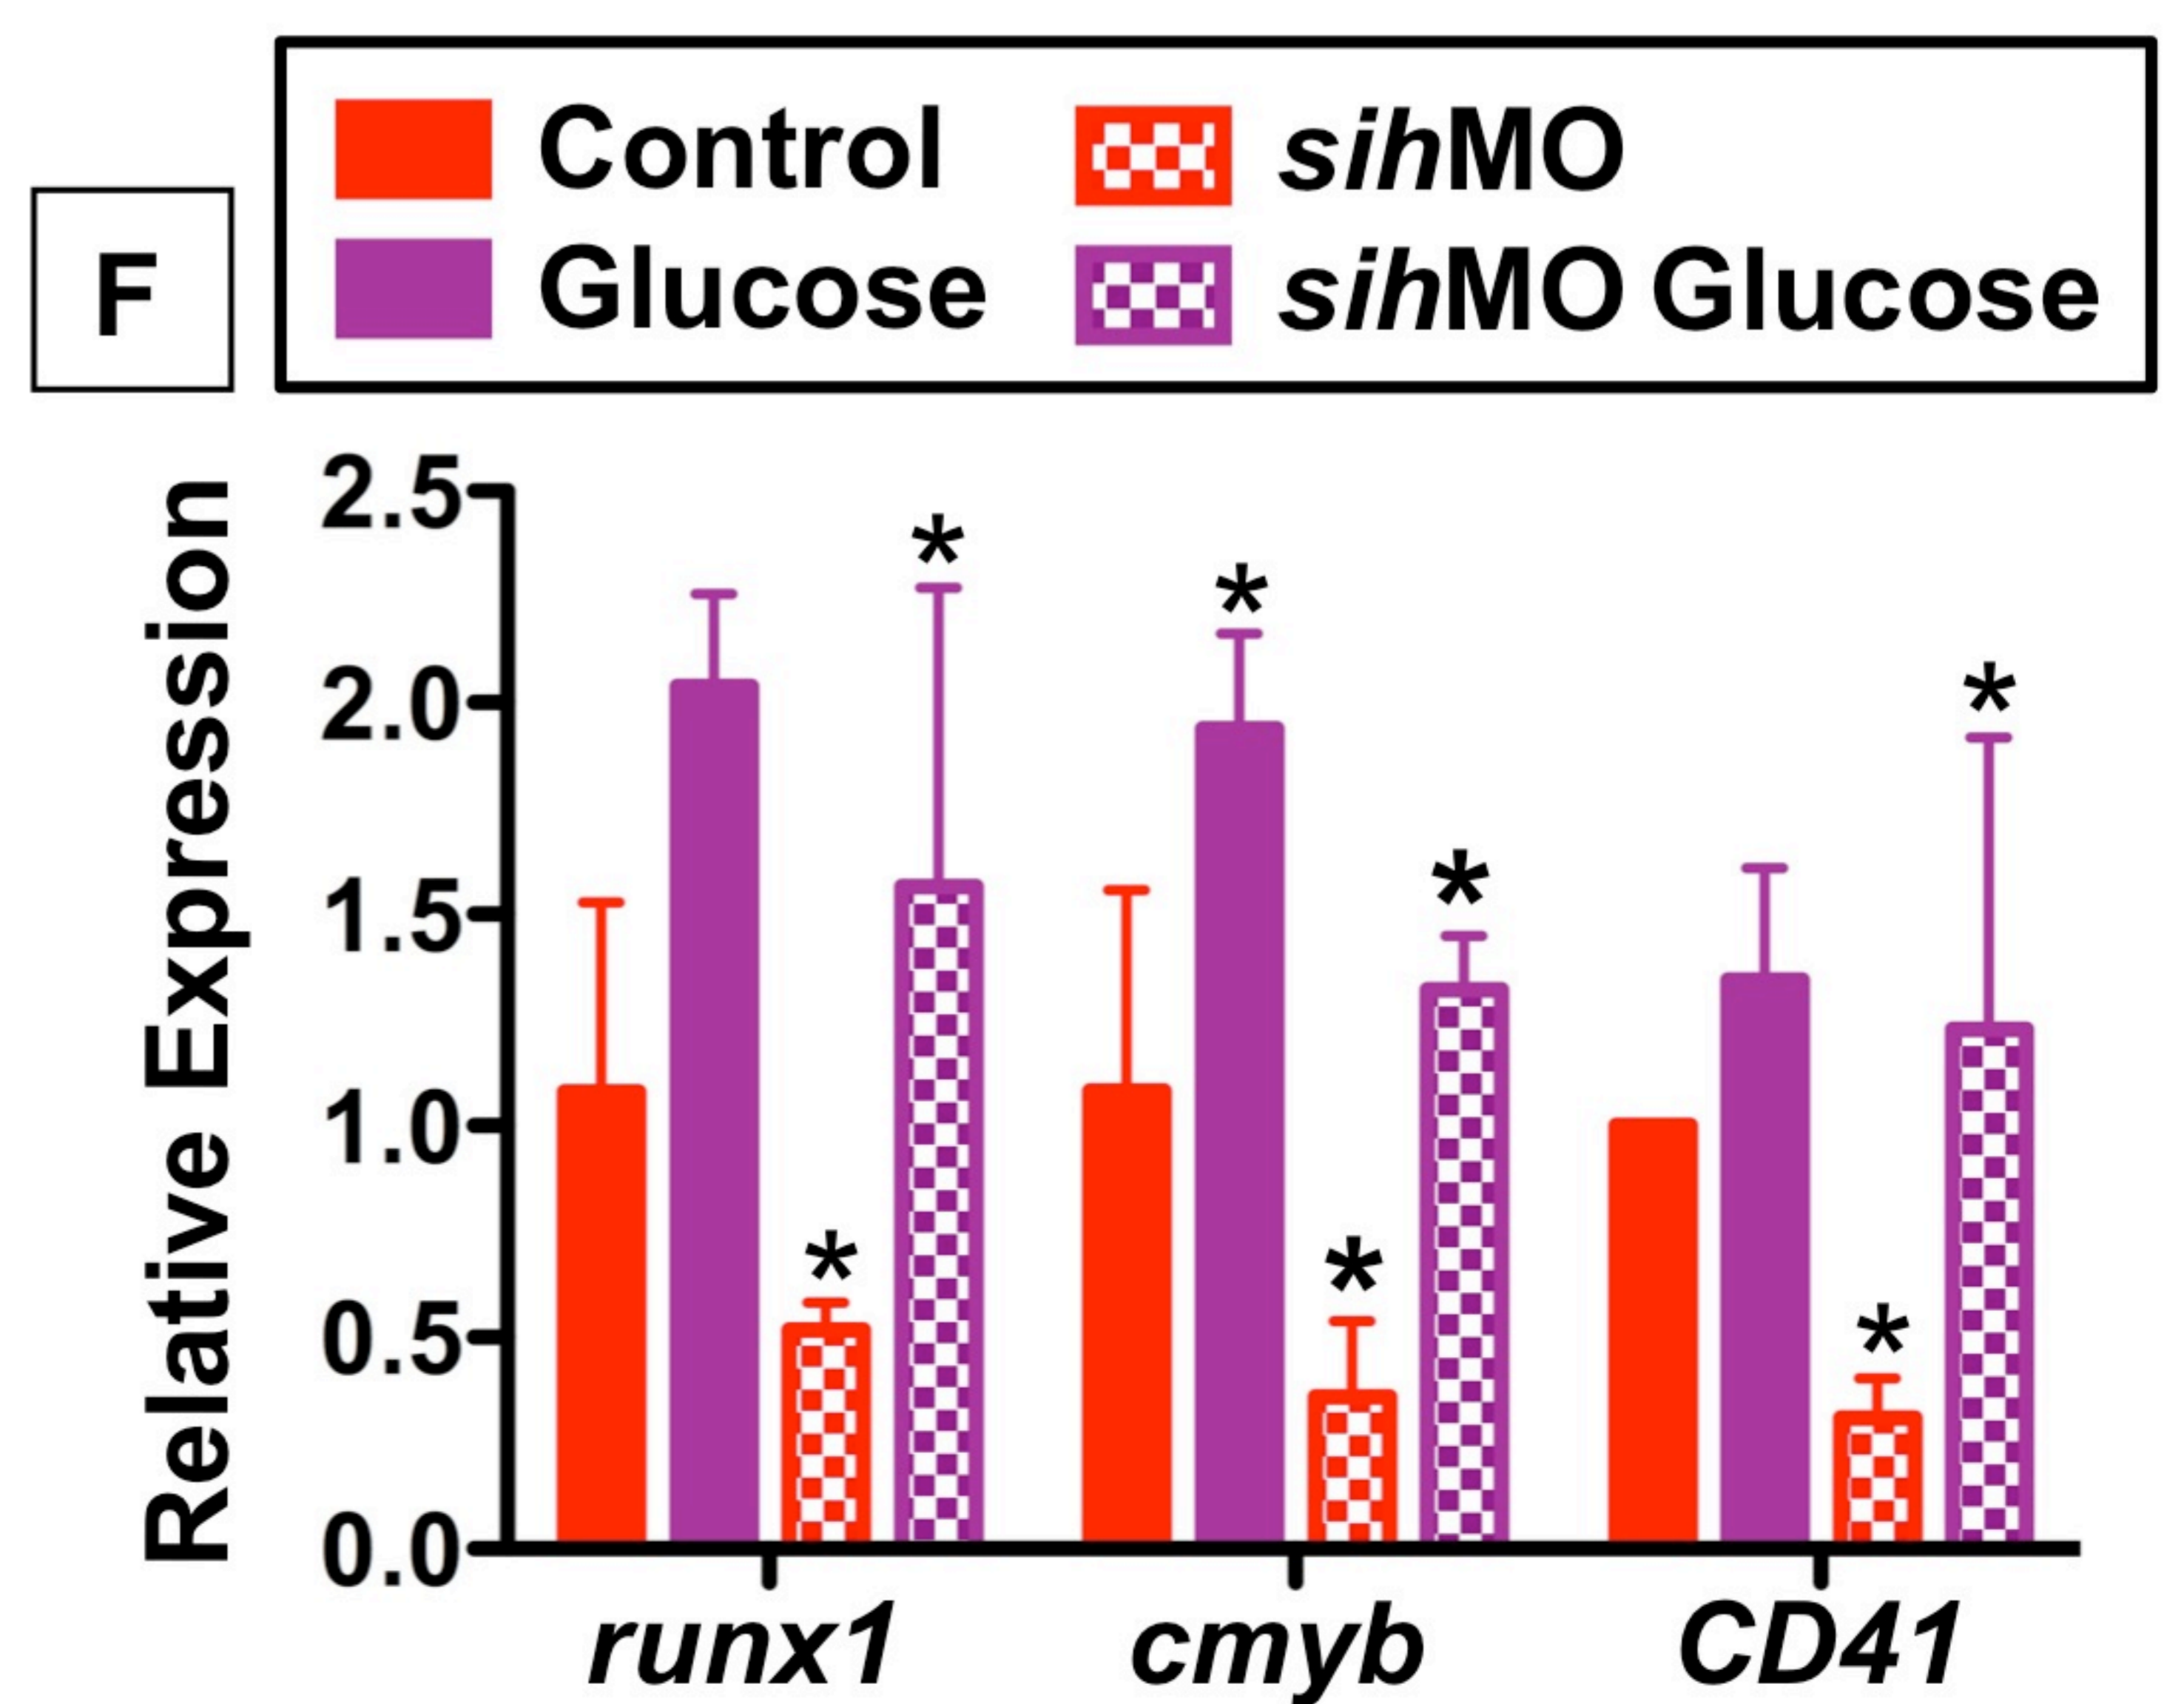

**S2A****BrdU**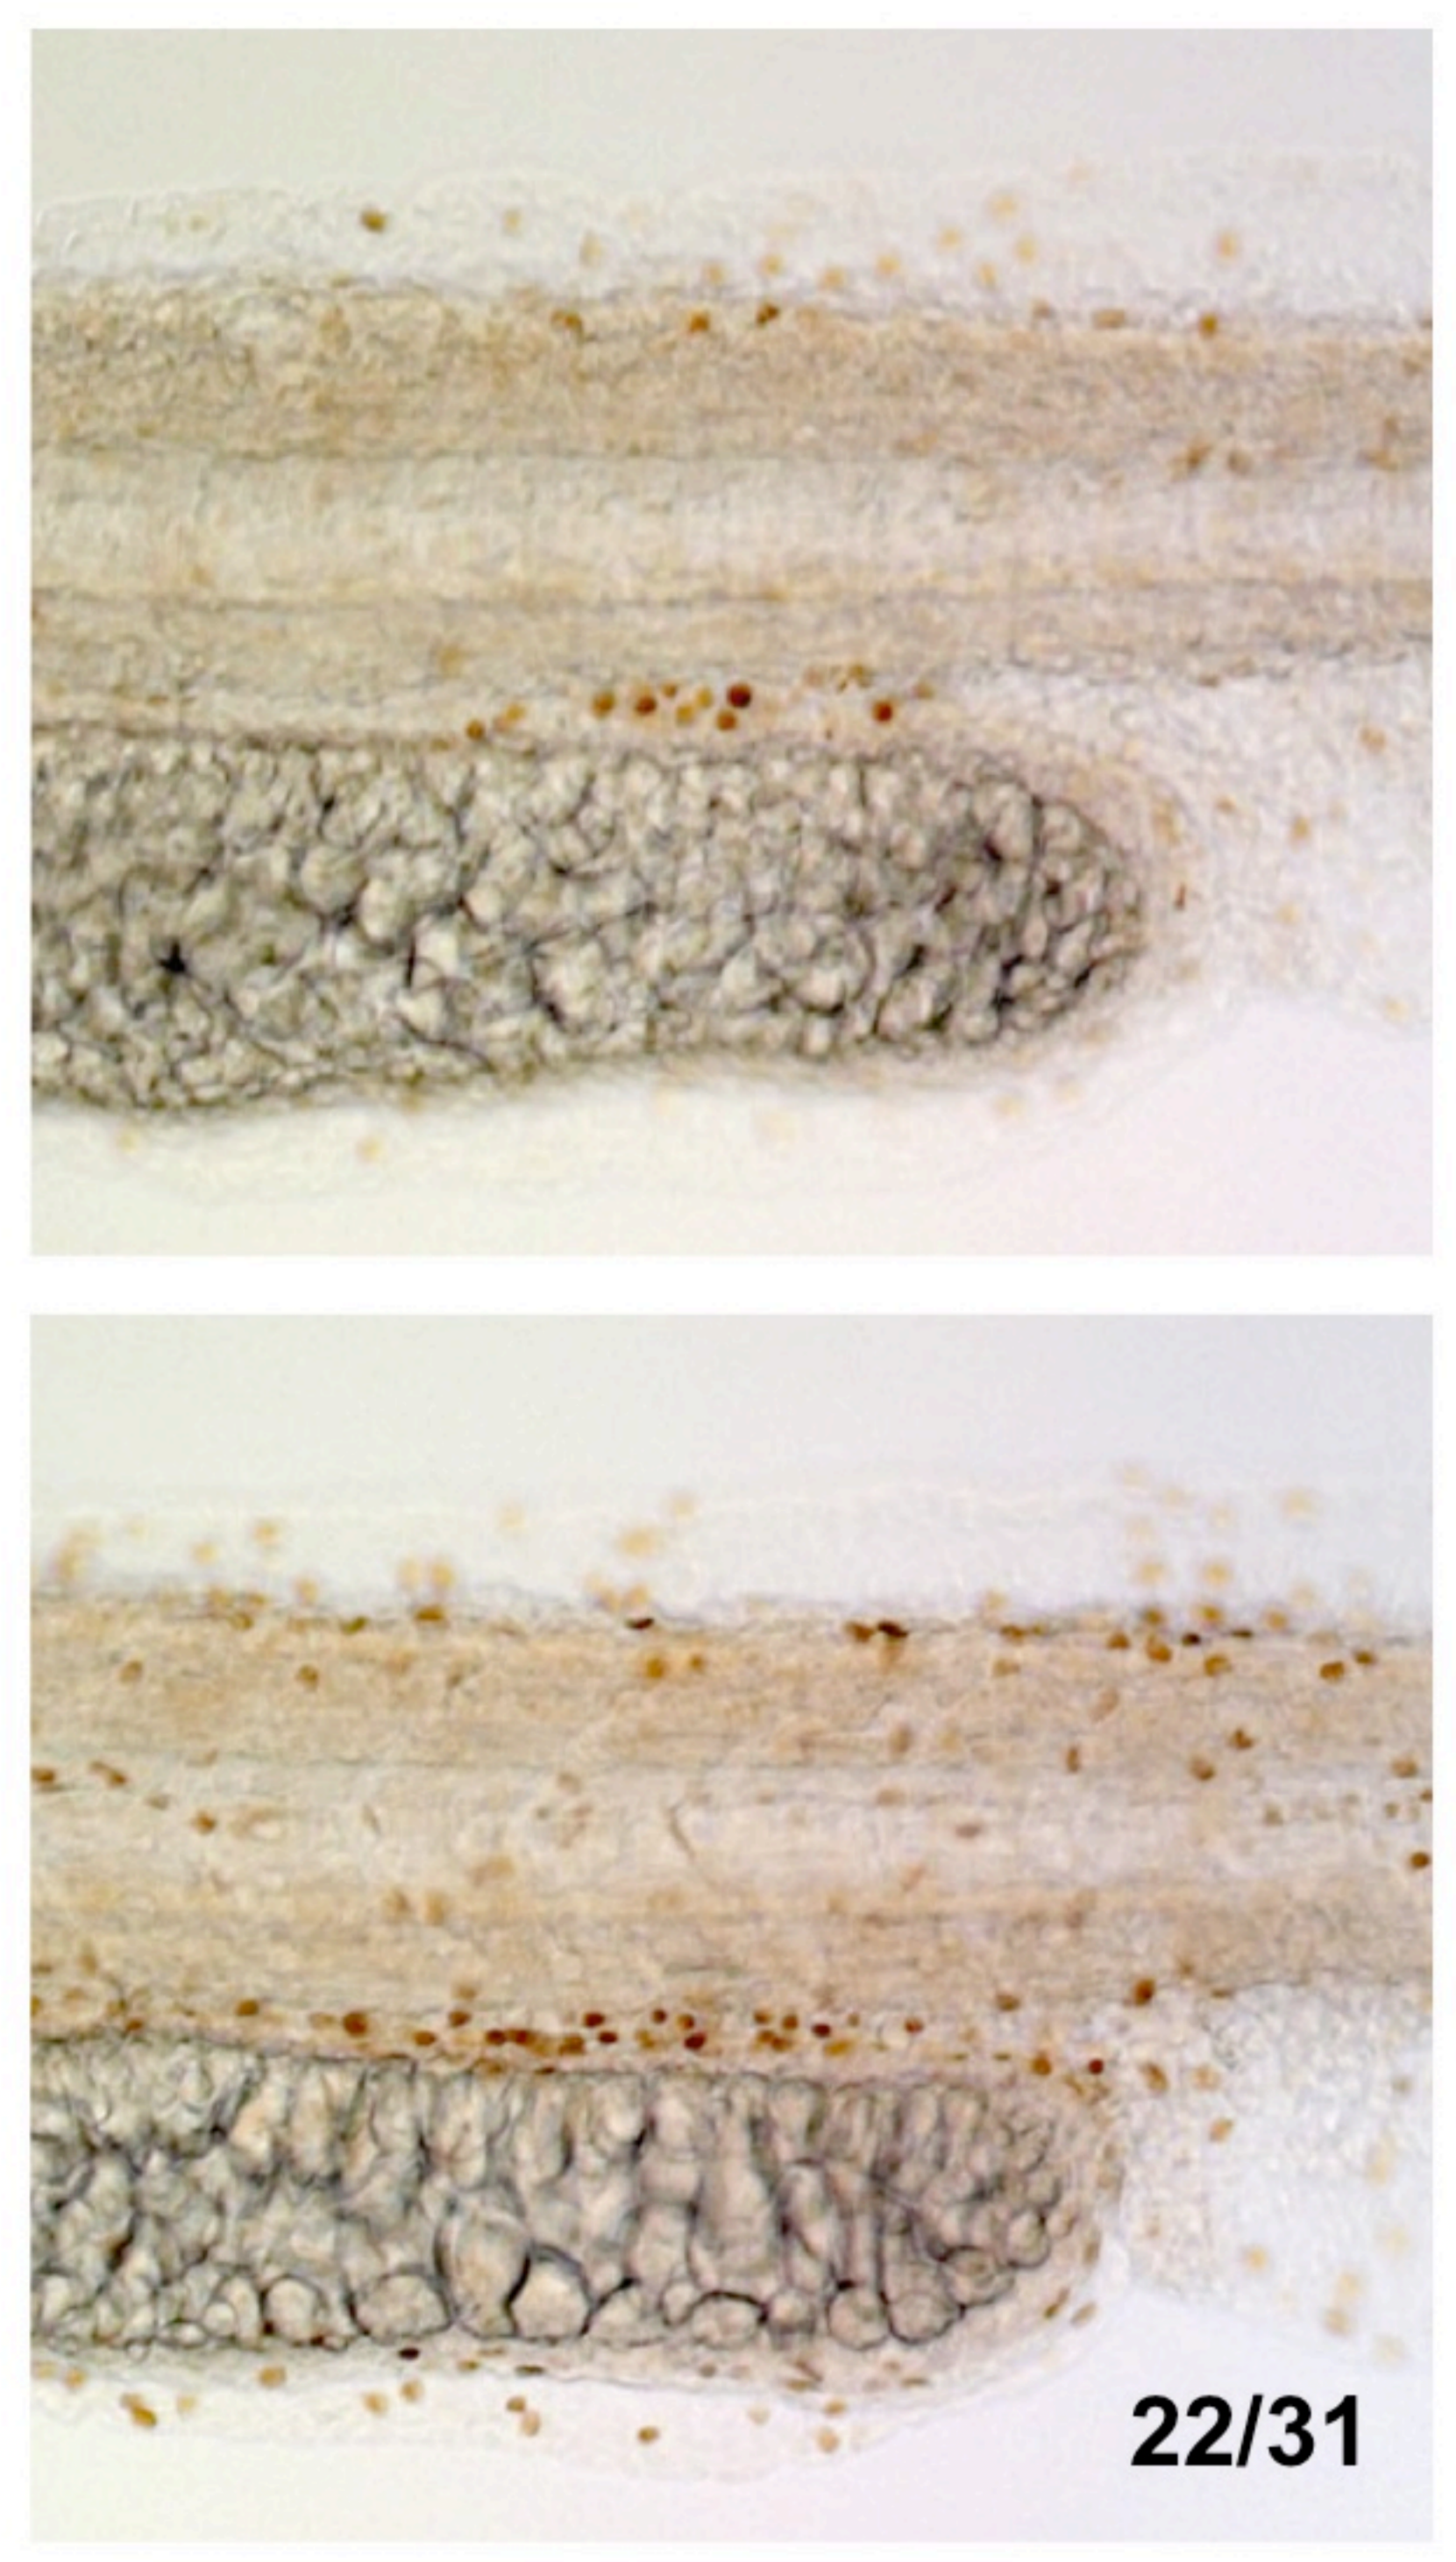**B*****In vivo* Reporter**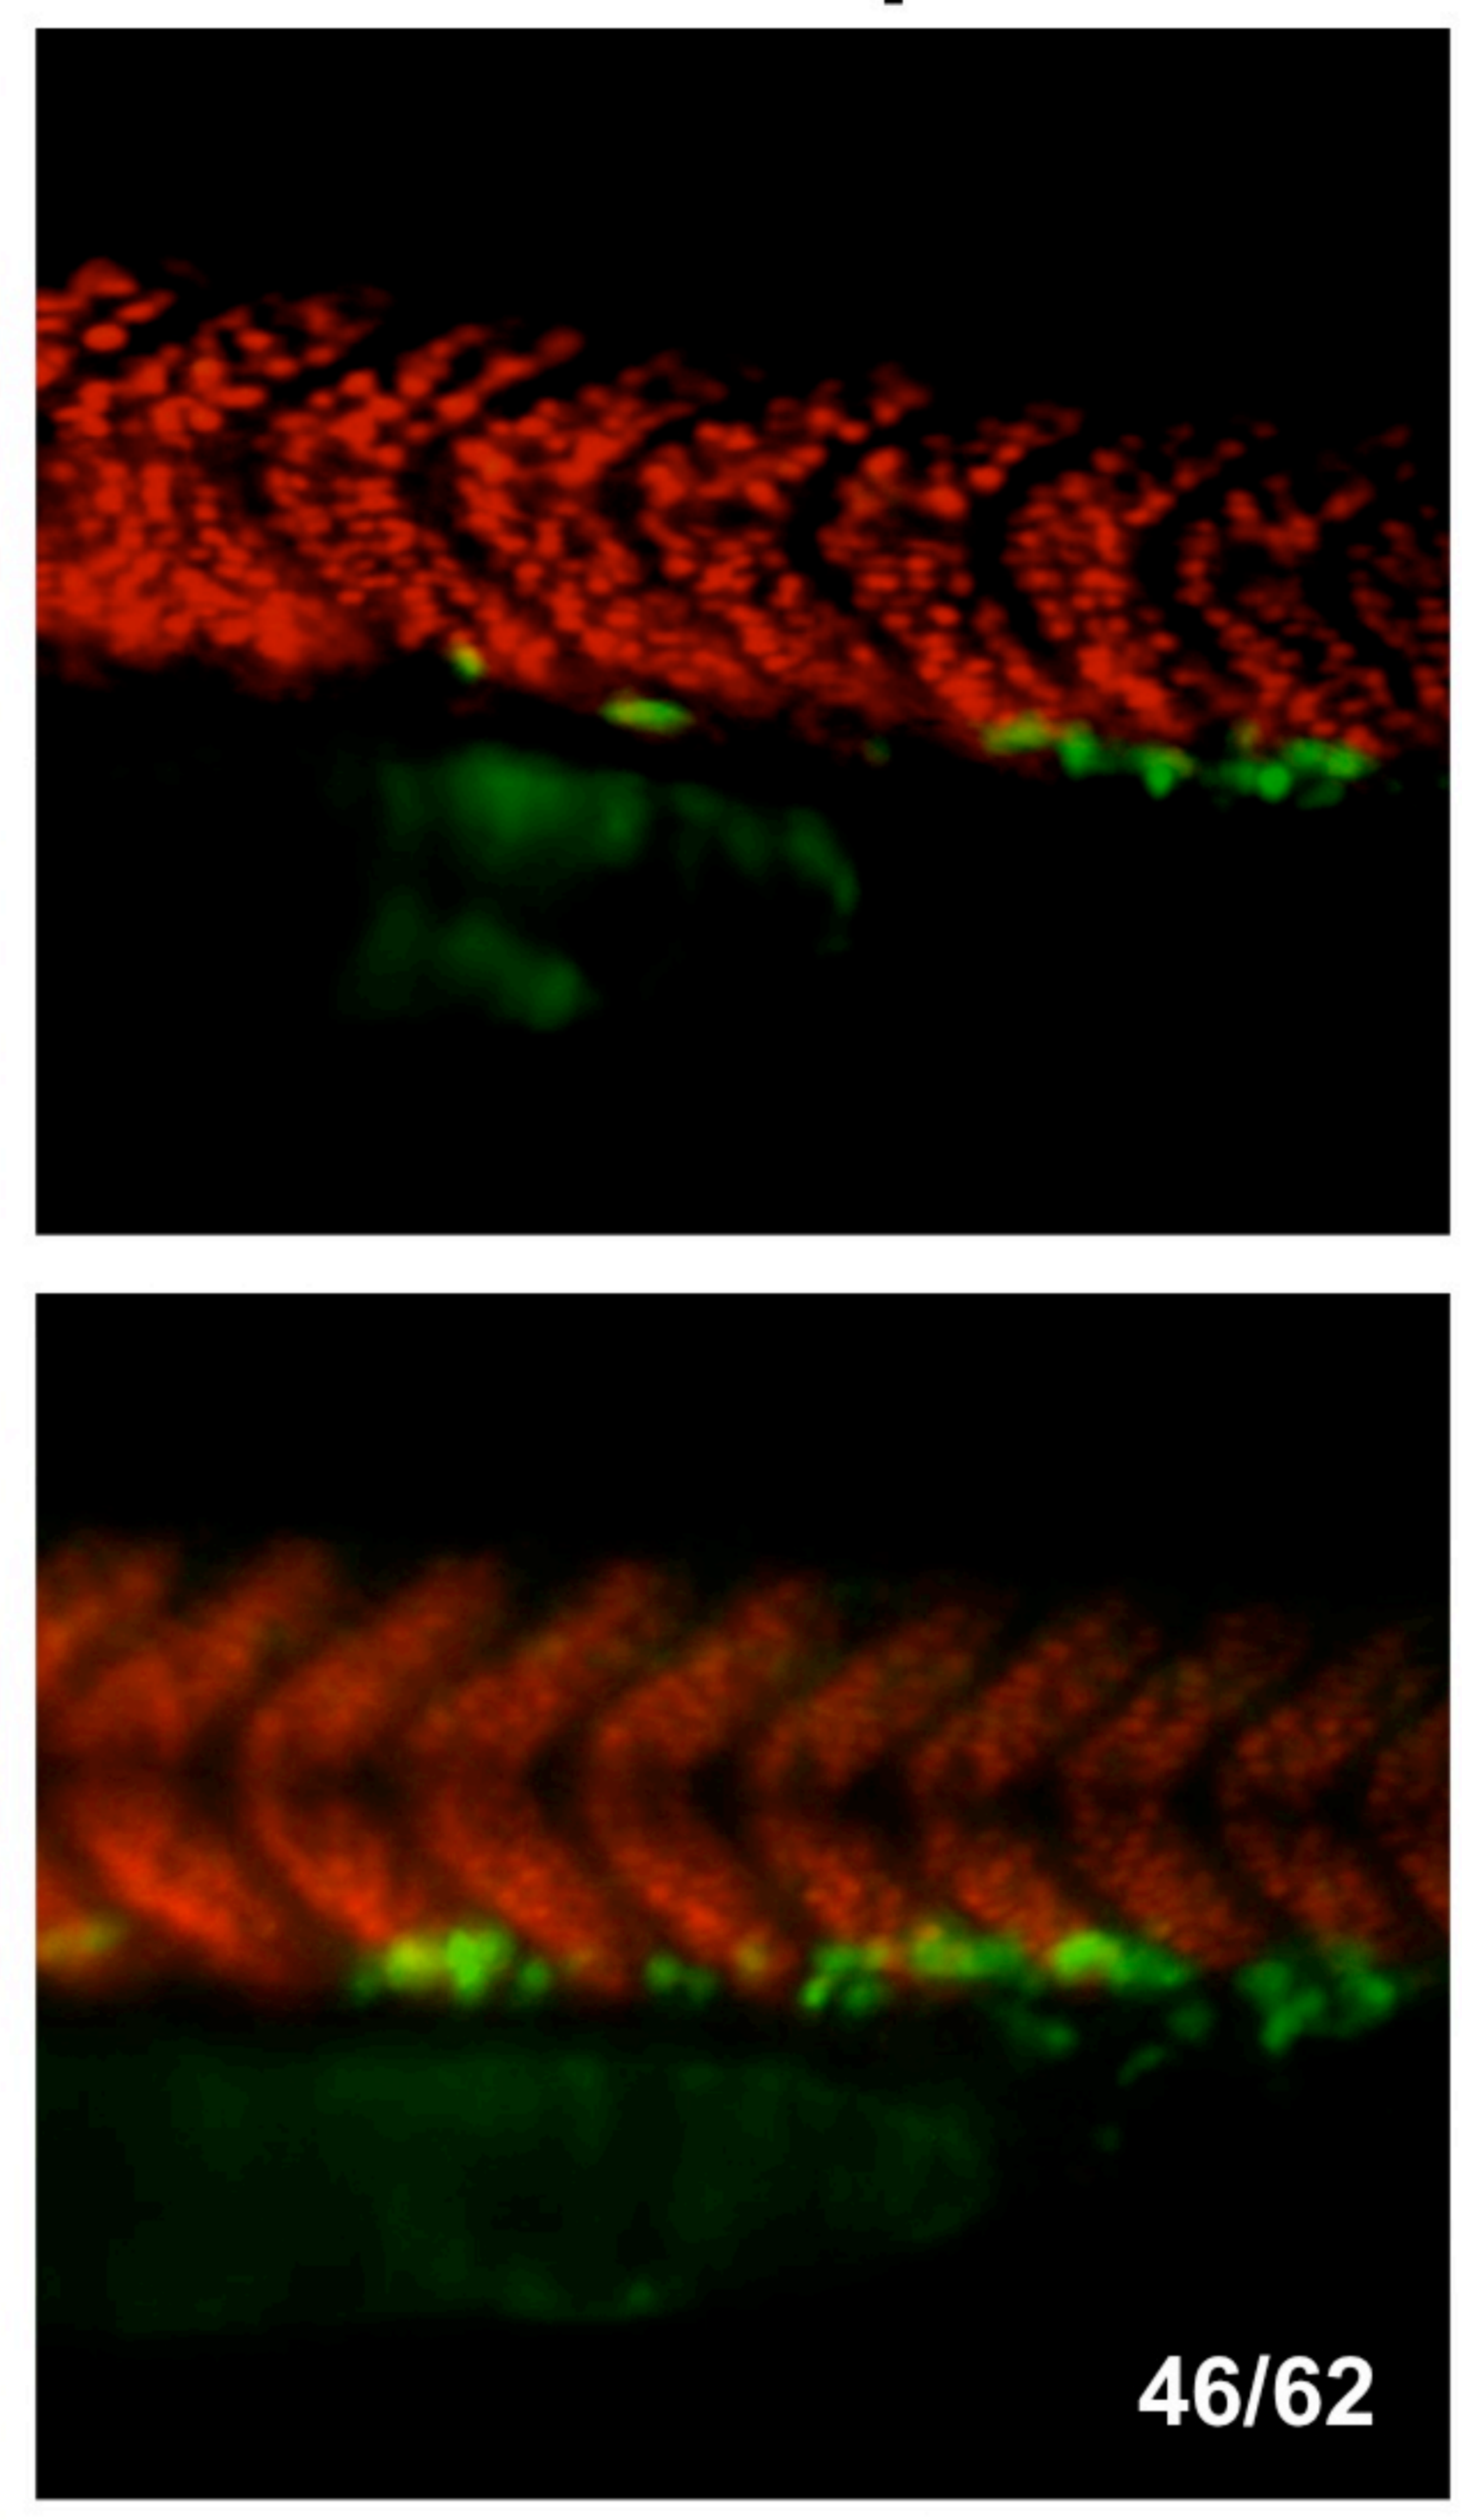**C****AGM Region Cell Count**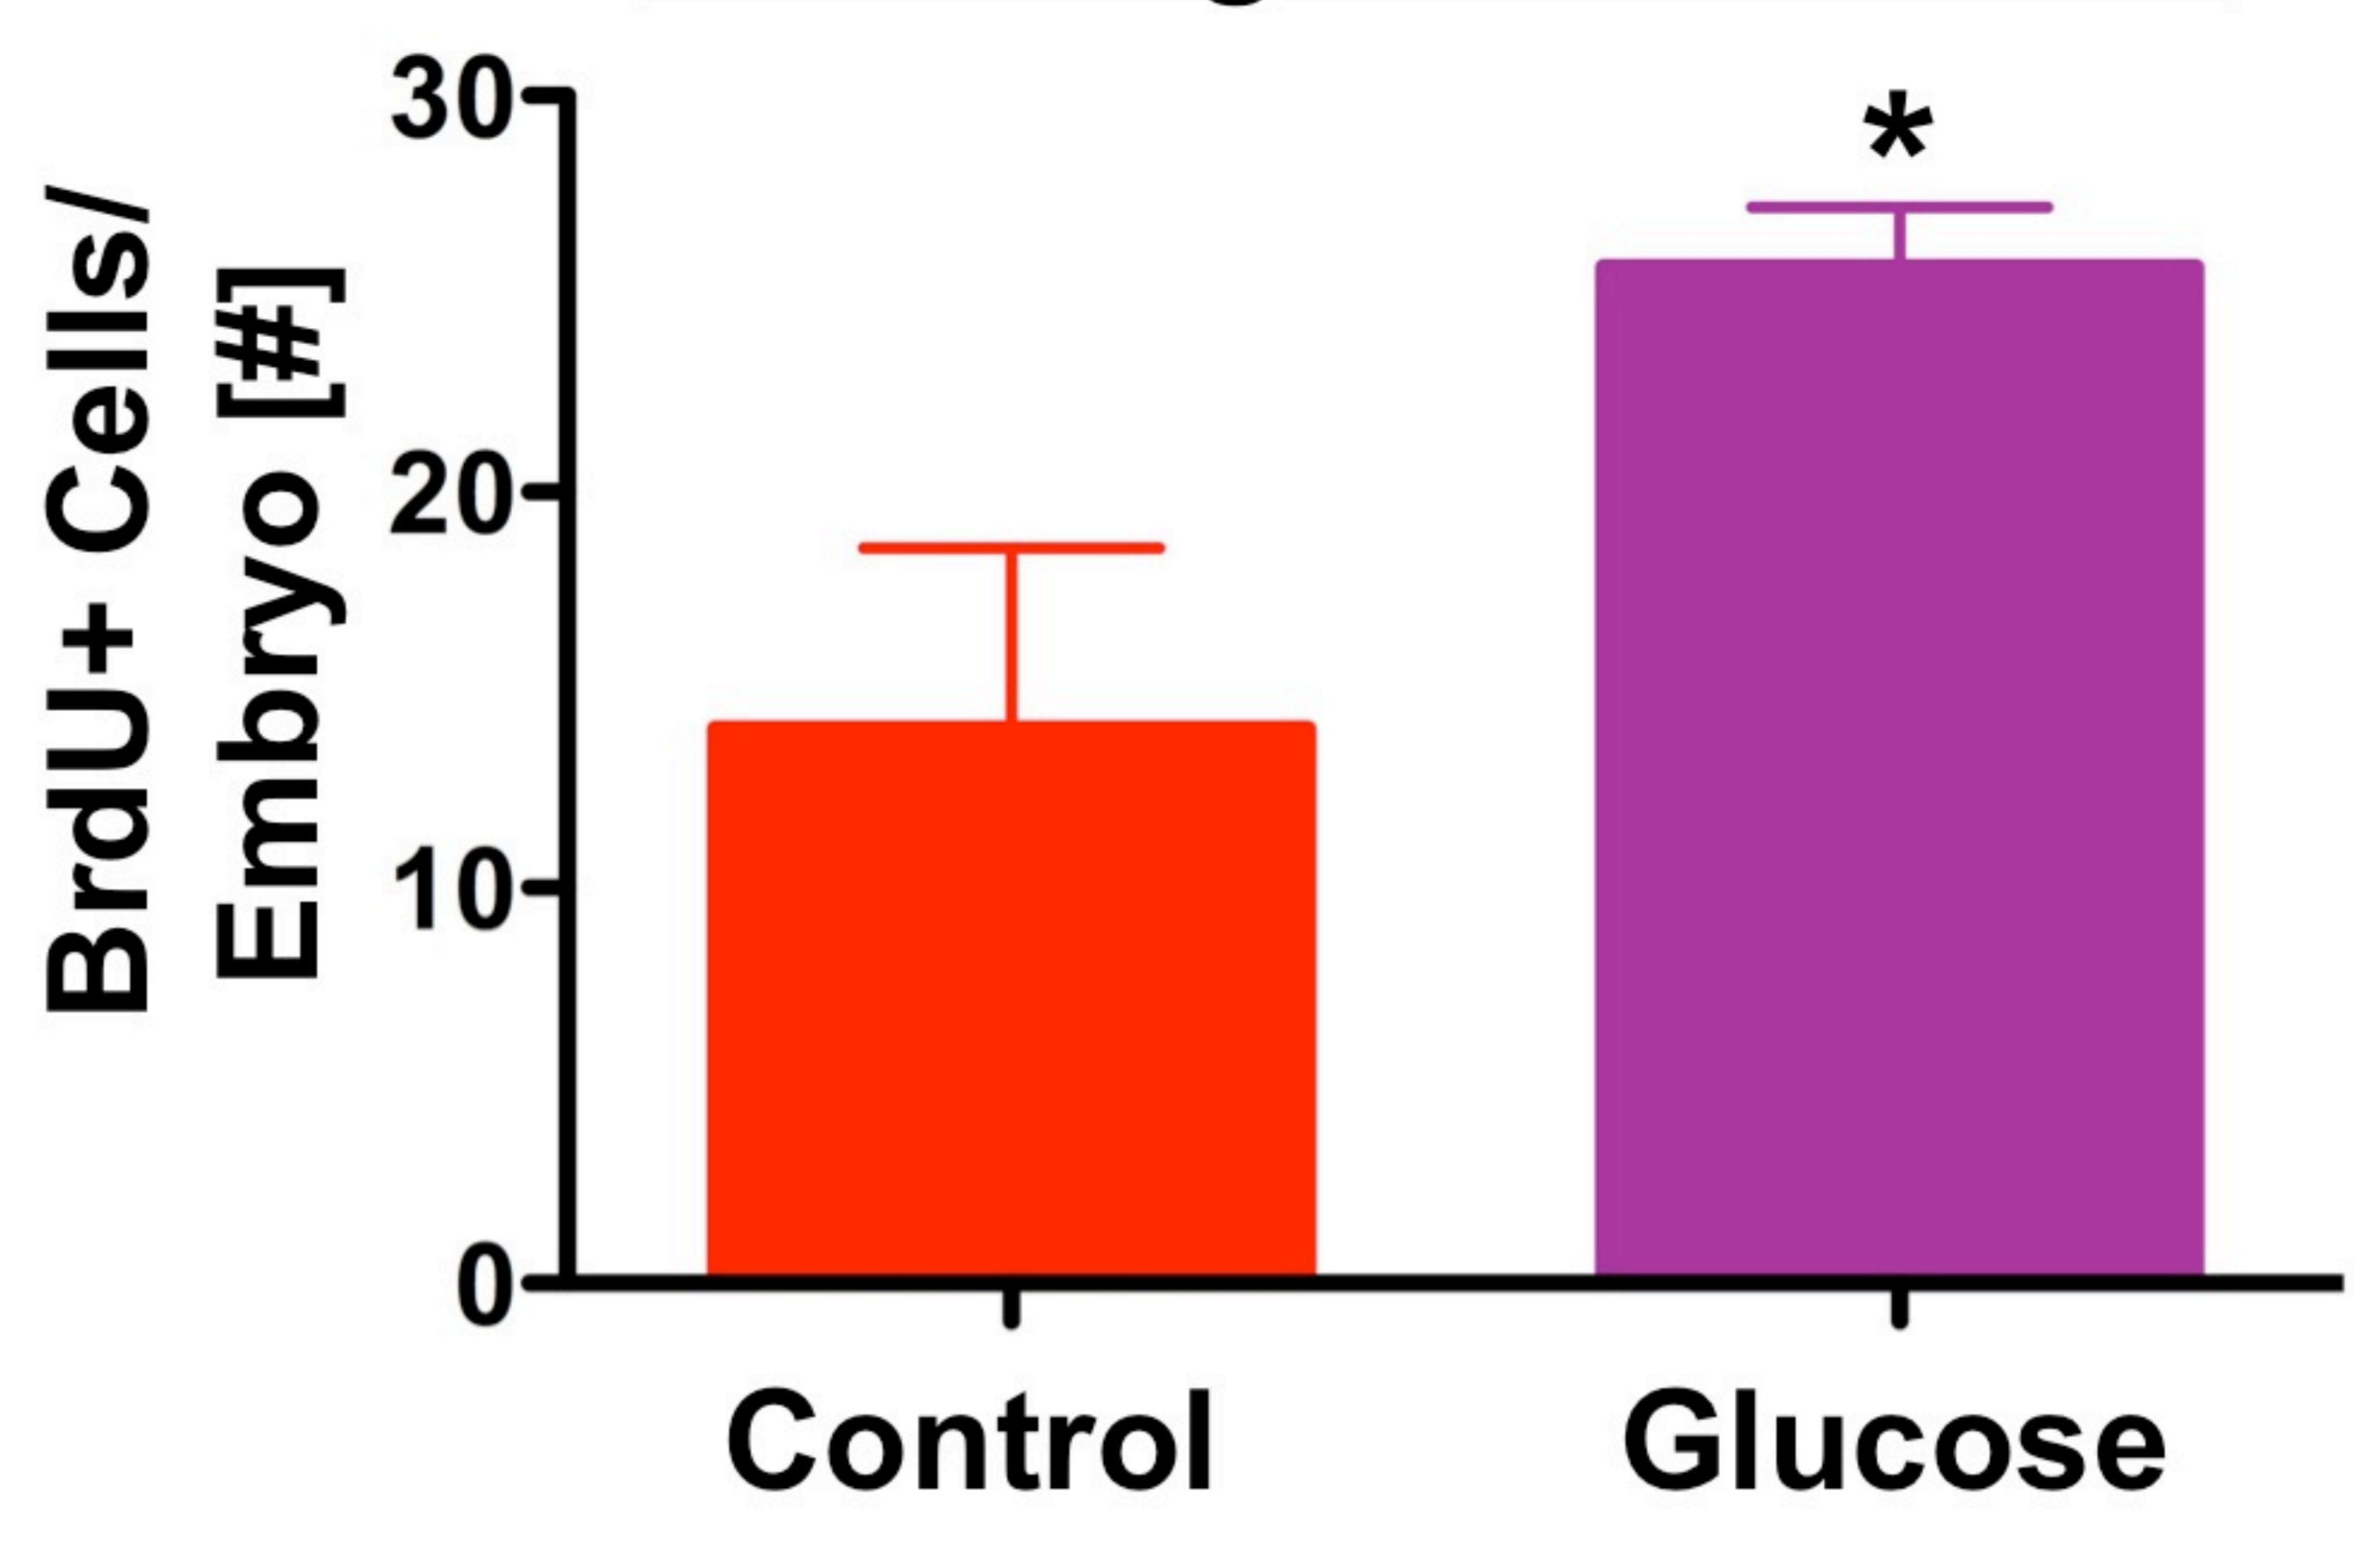**D****Propidium Iodide FACS**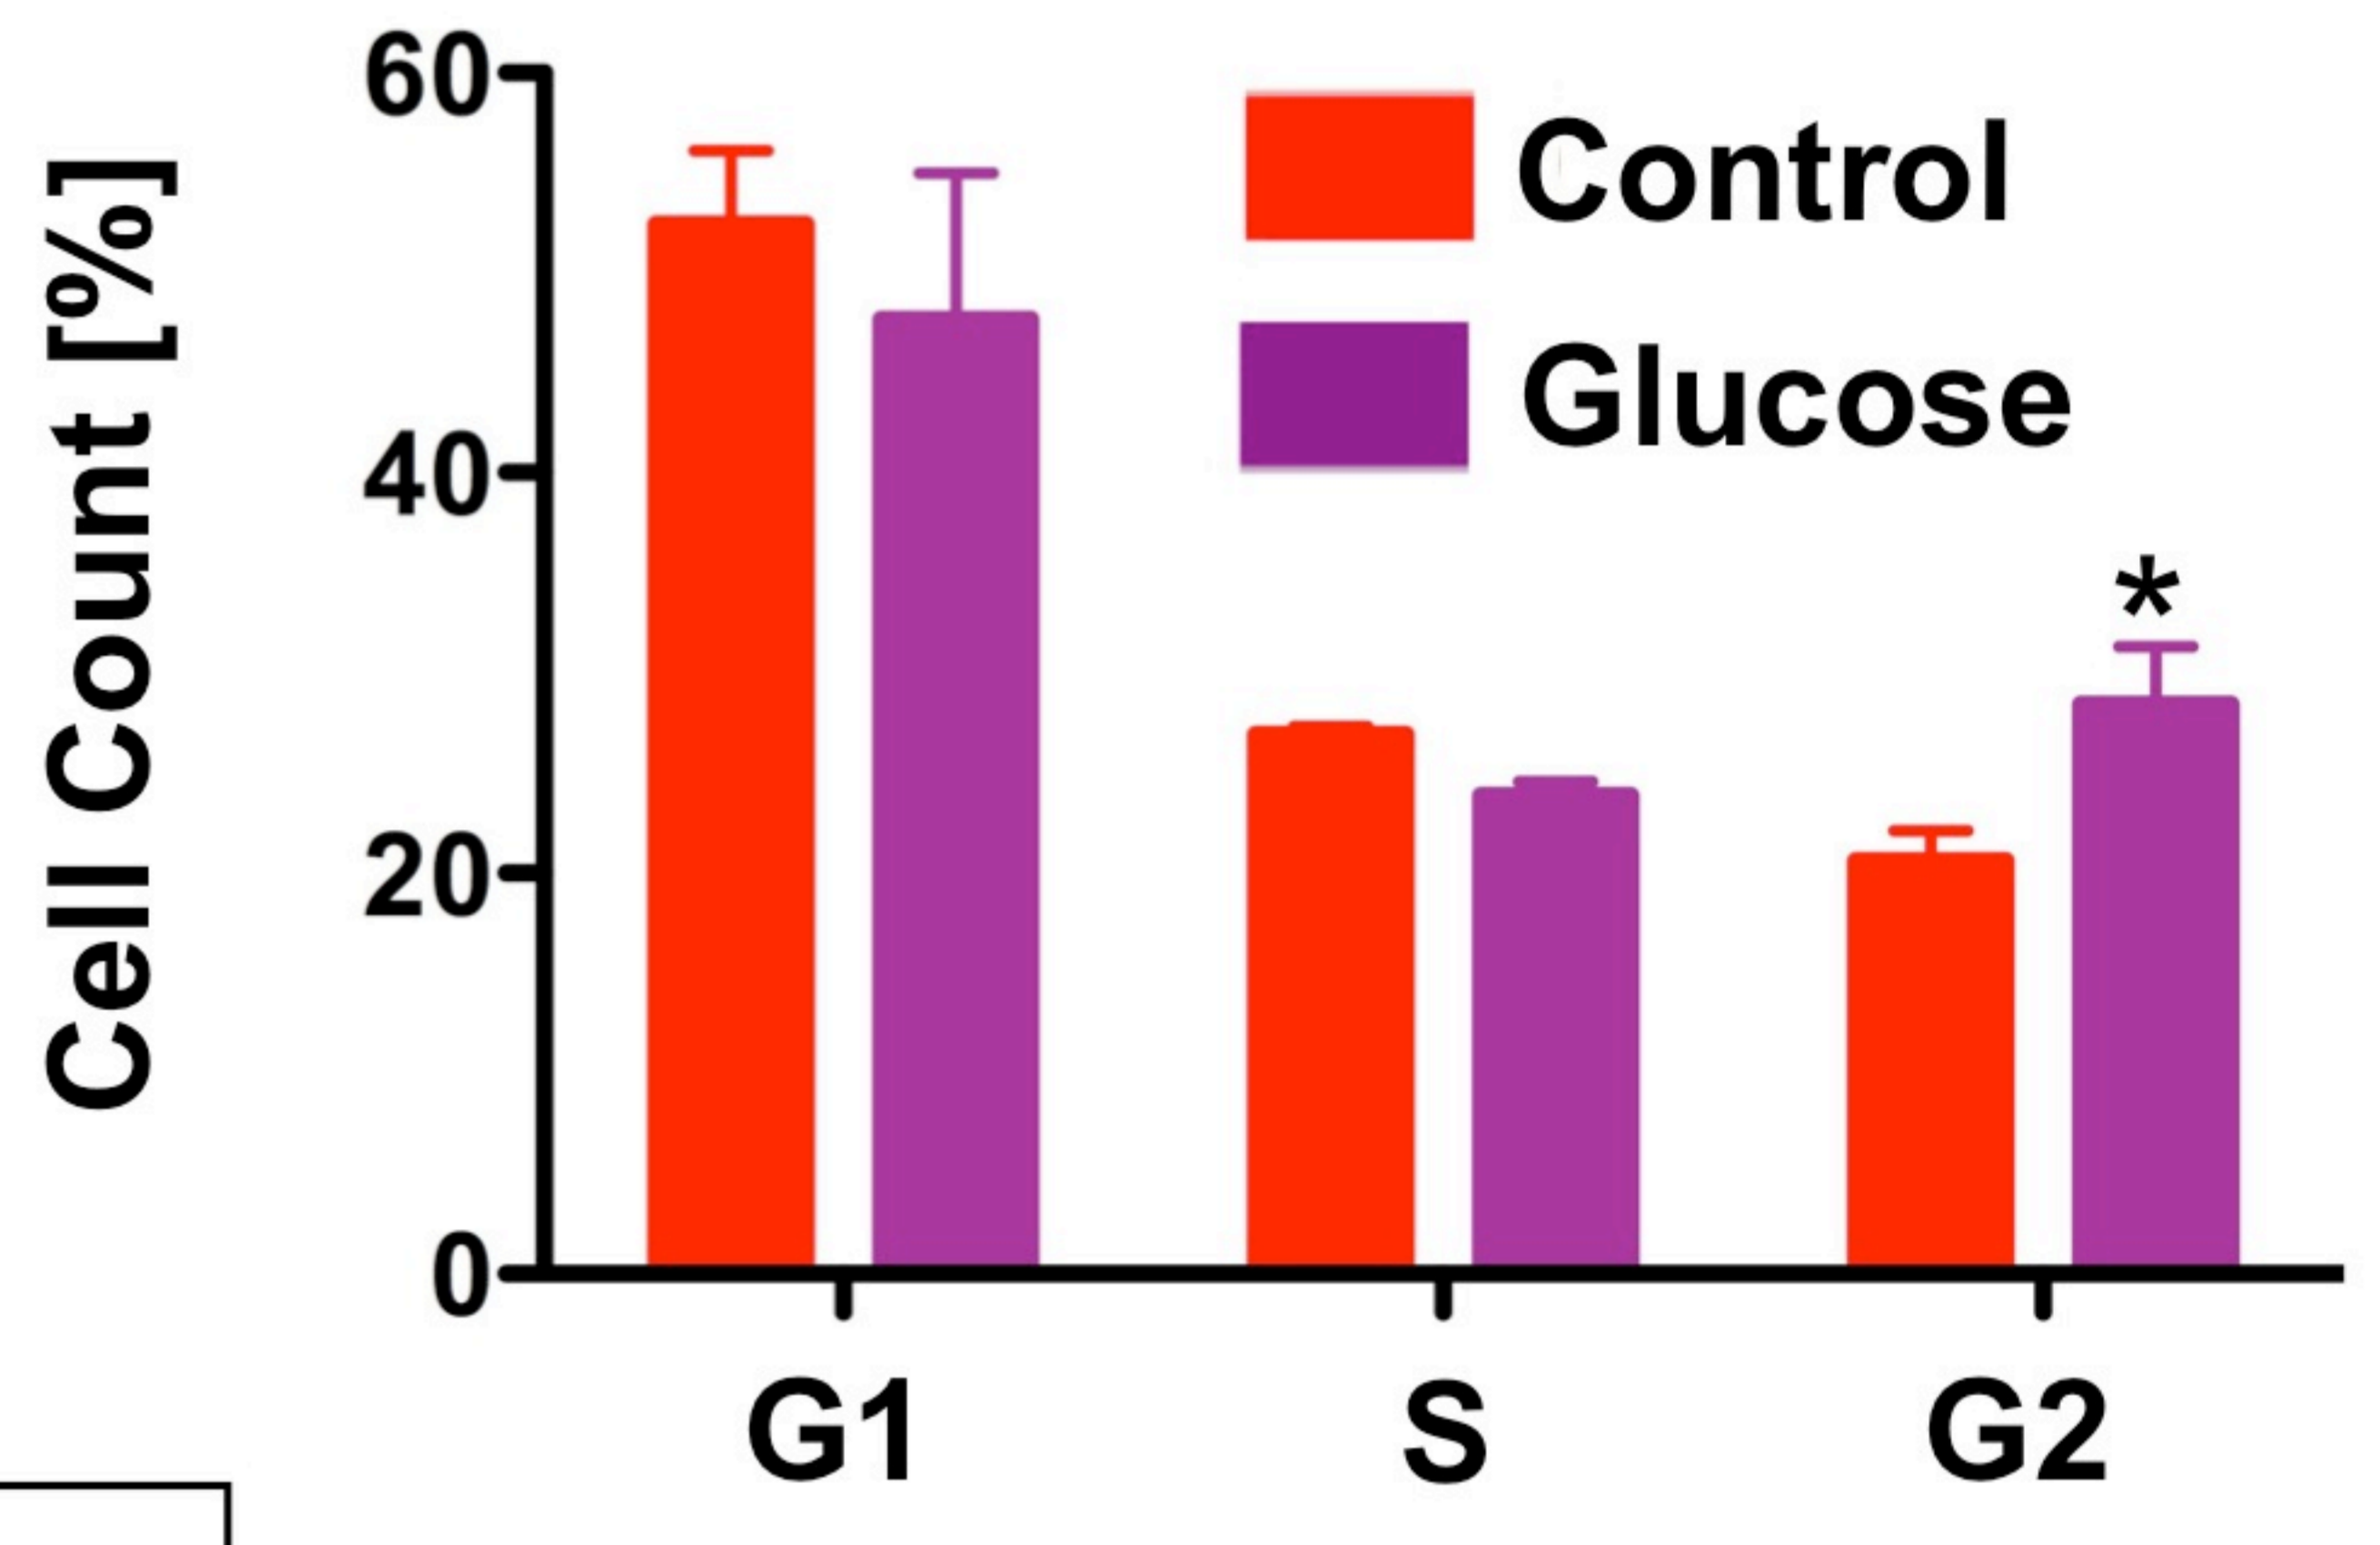**E****Hemocytometer Count**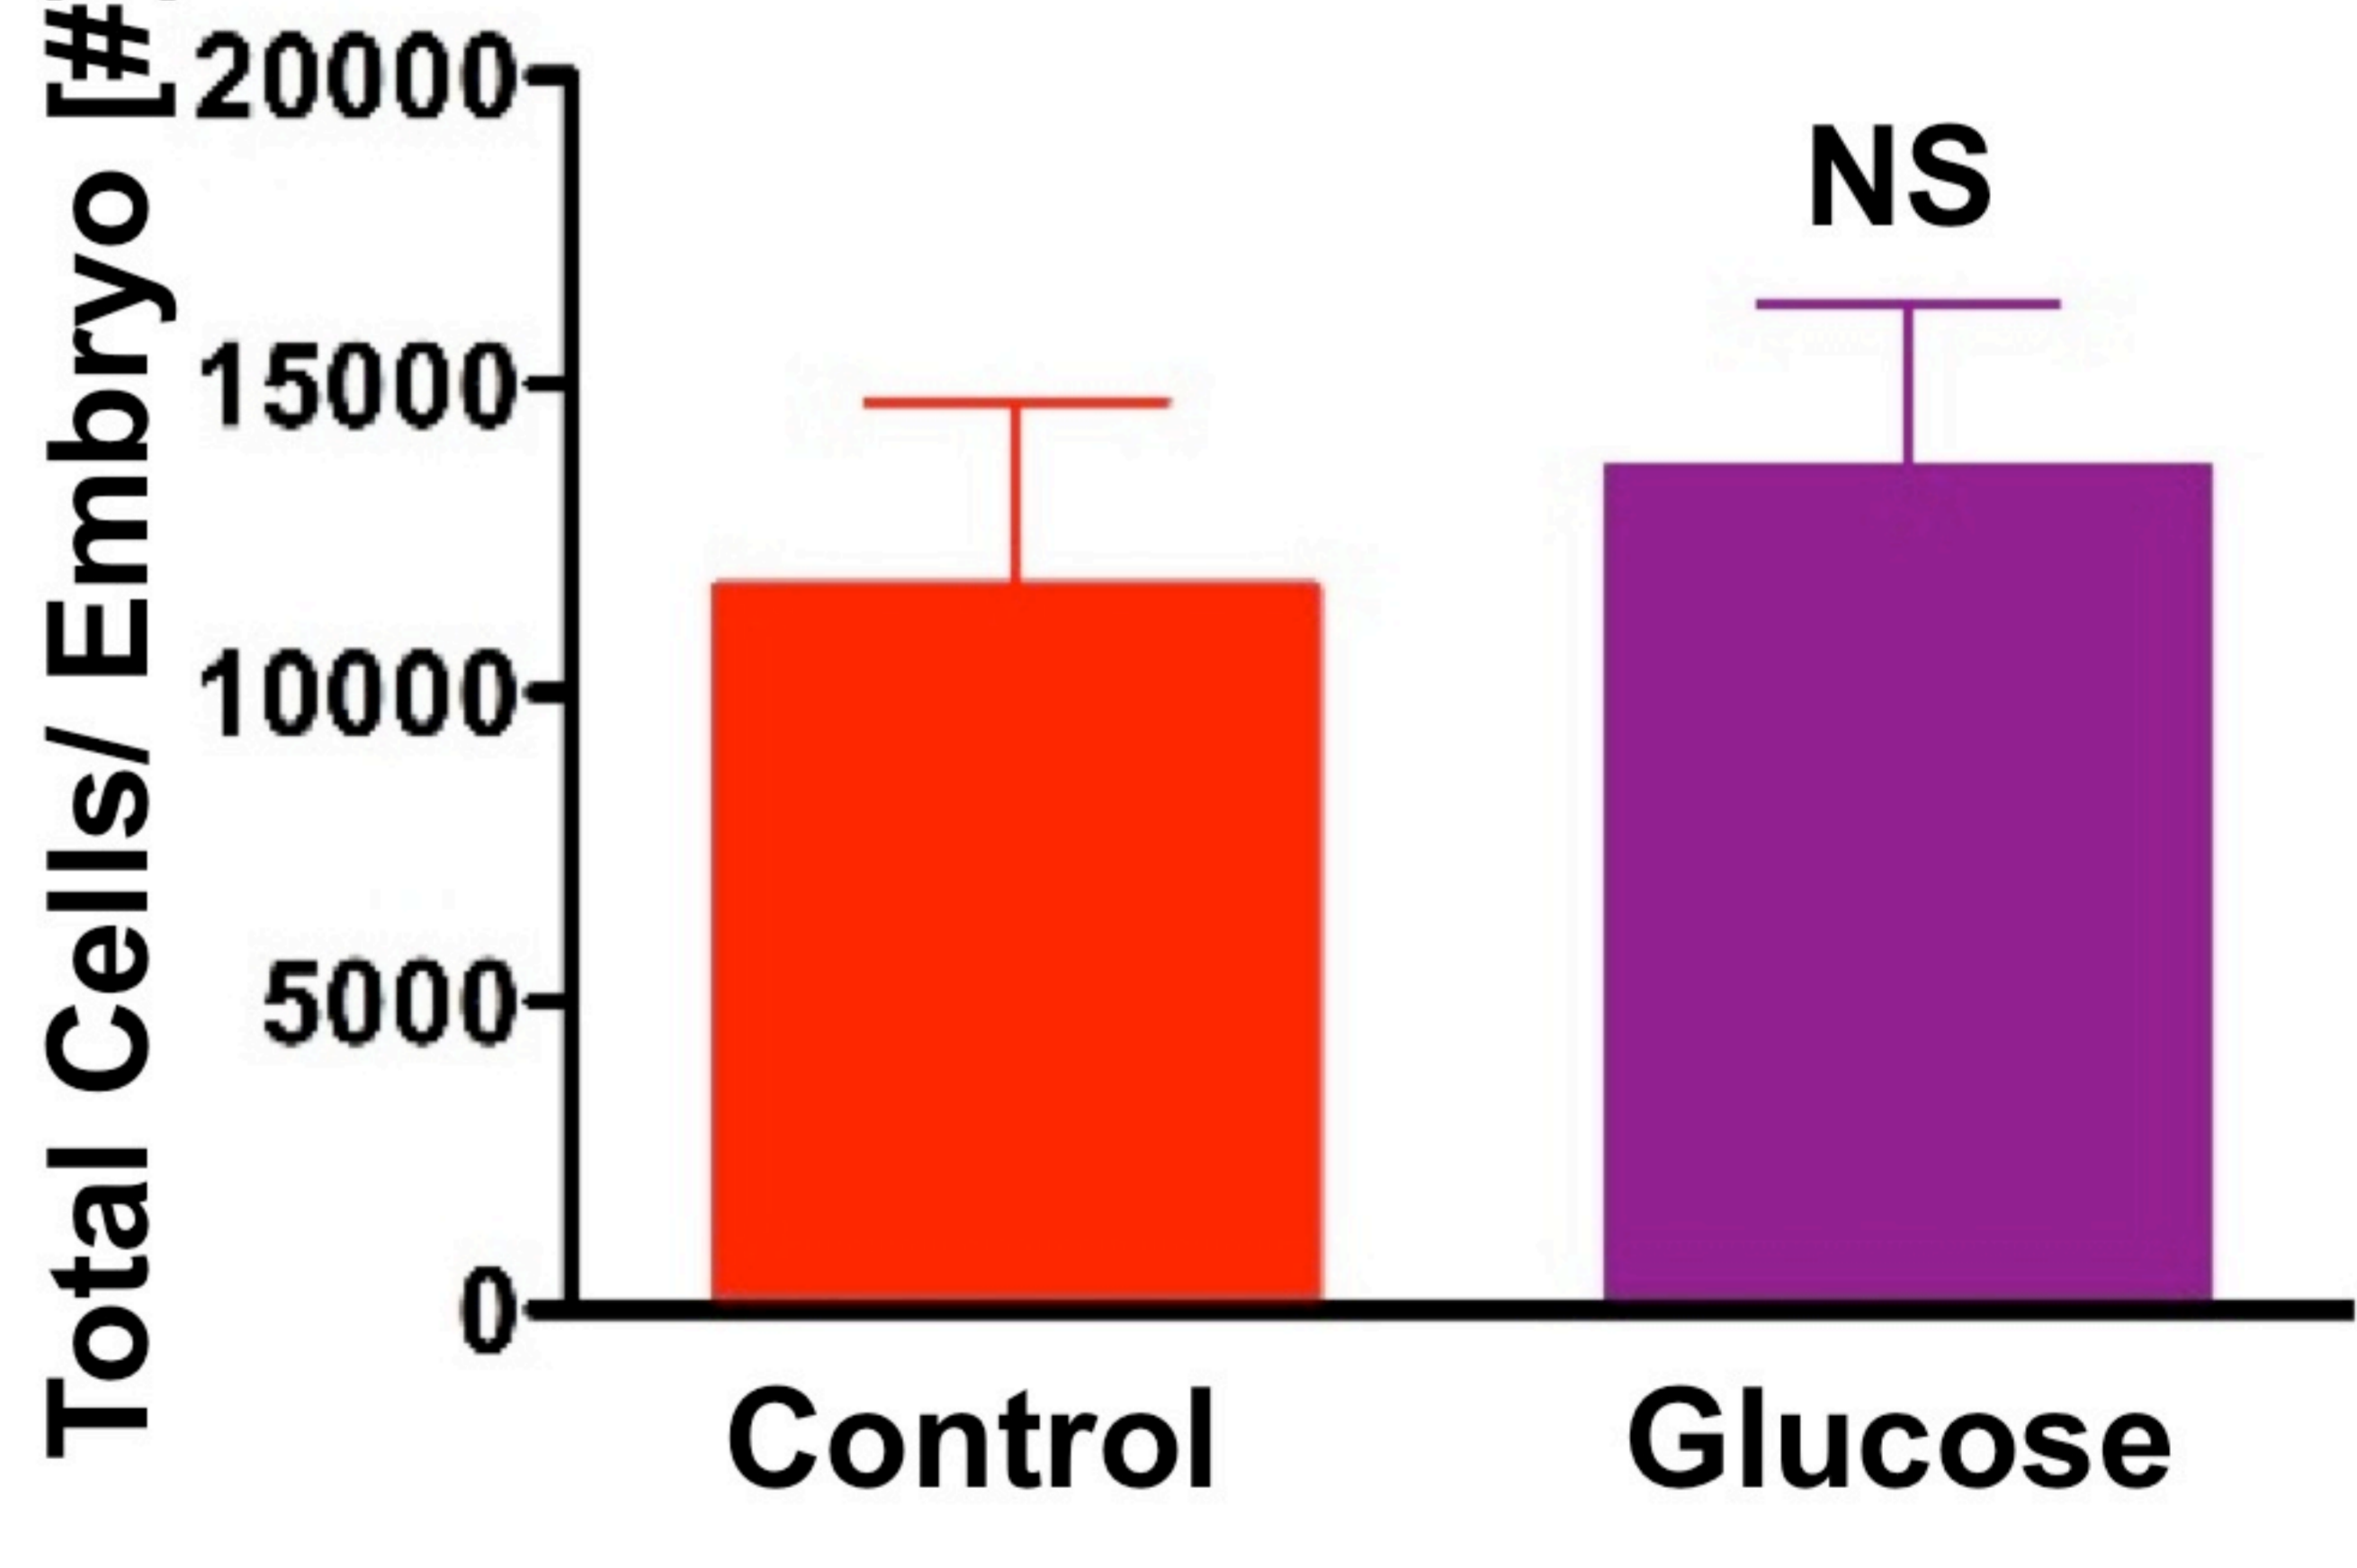**F****Bradford Assay**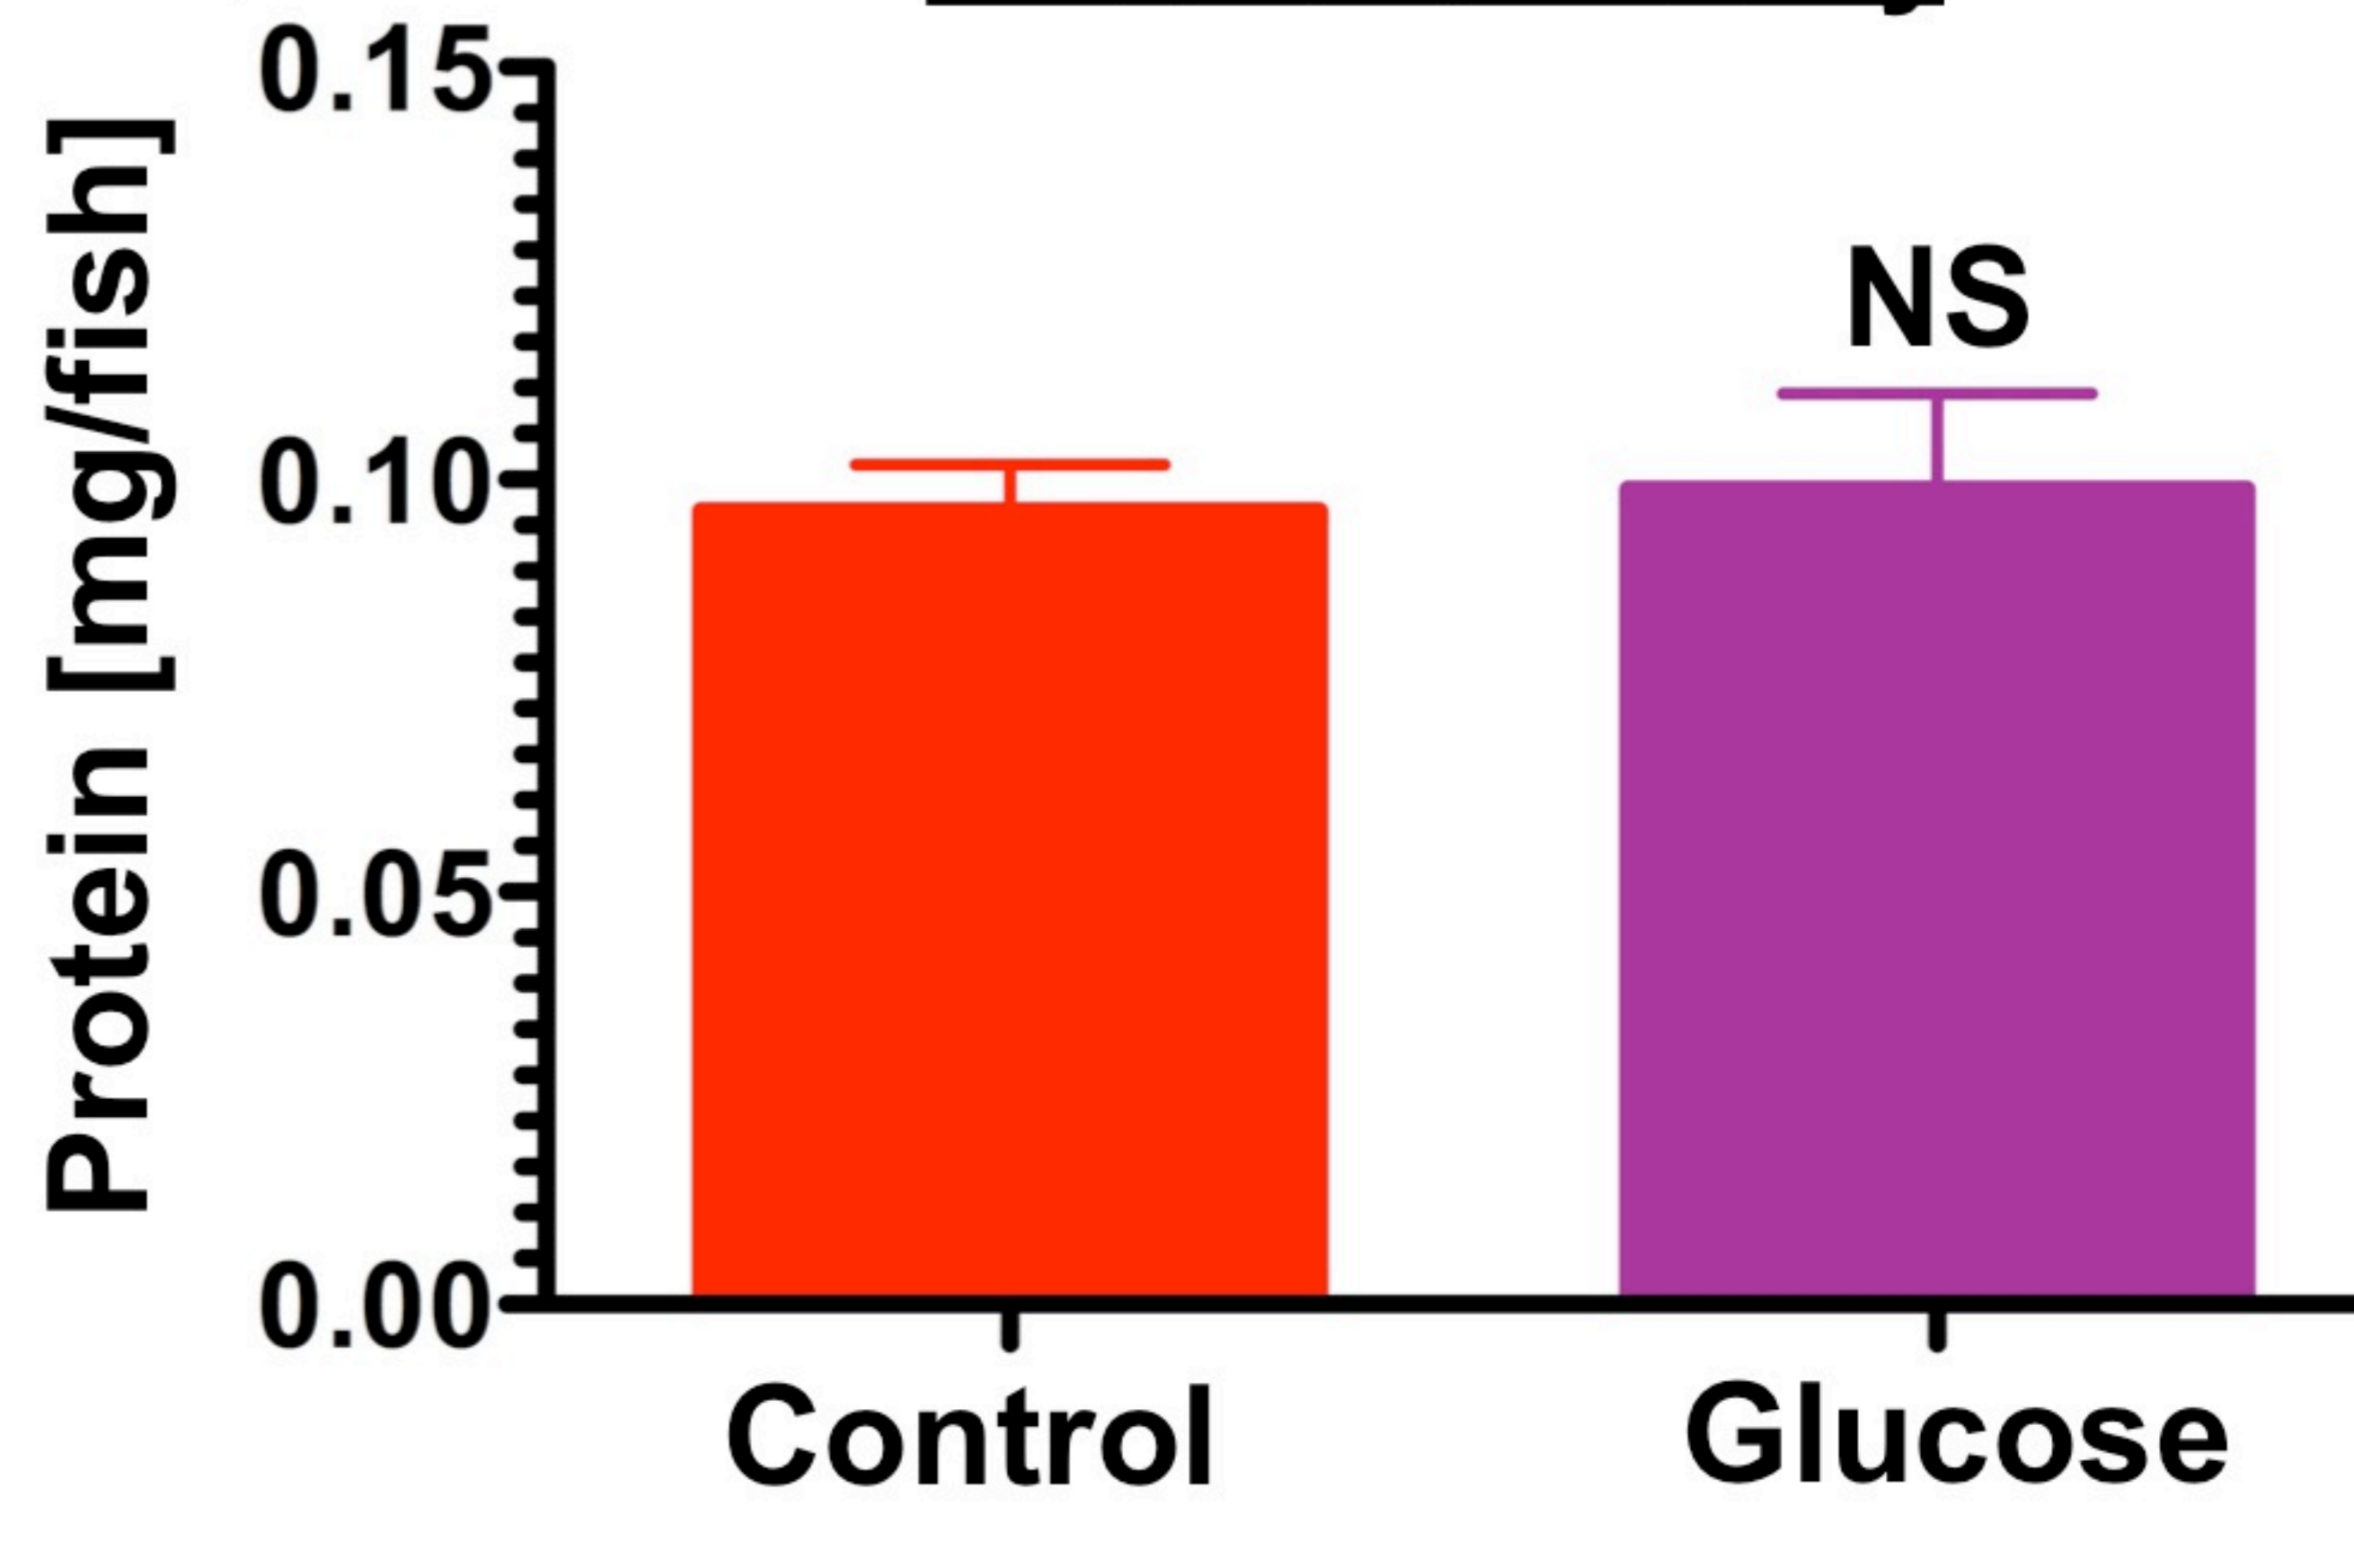**G****36hpf****Control****Glucose****MHC**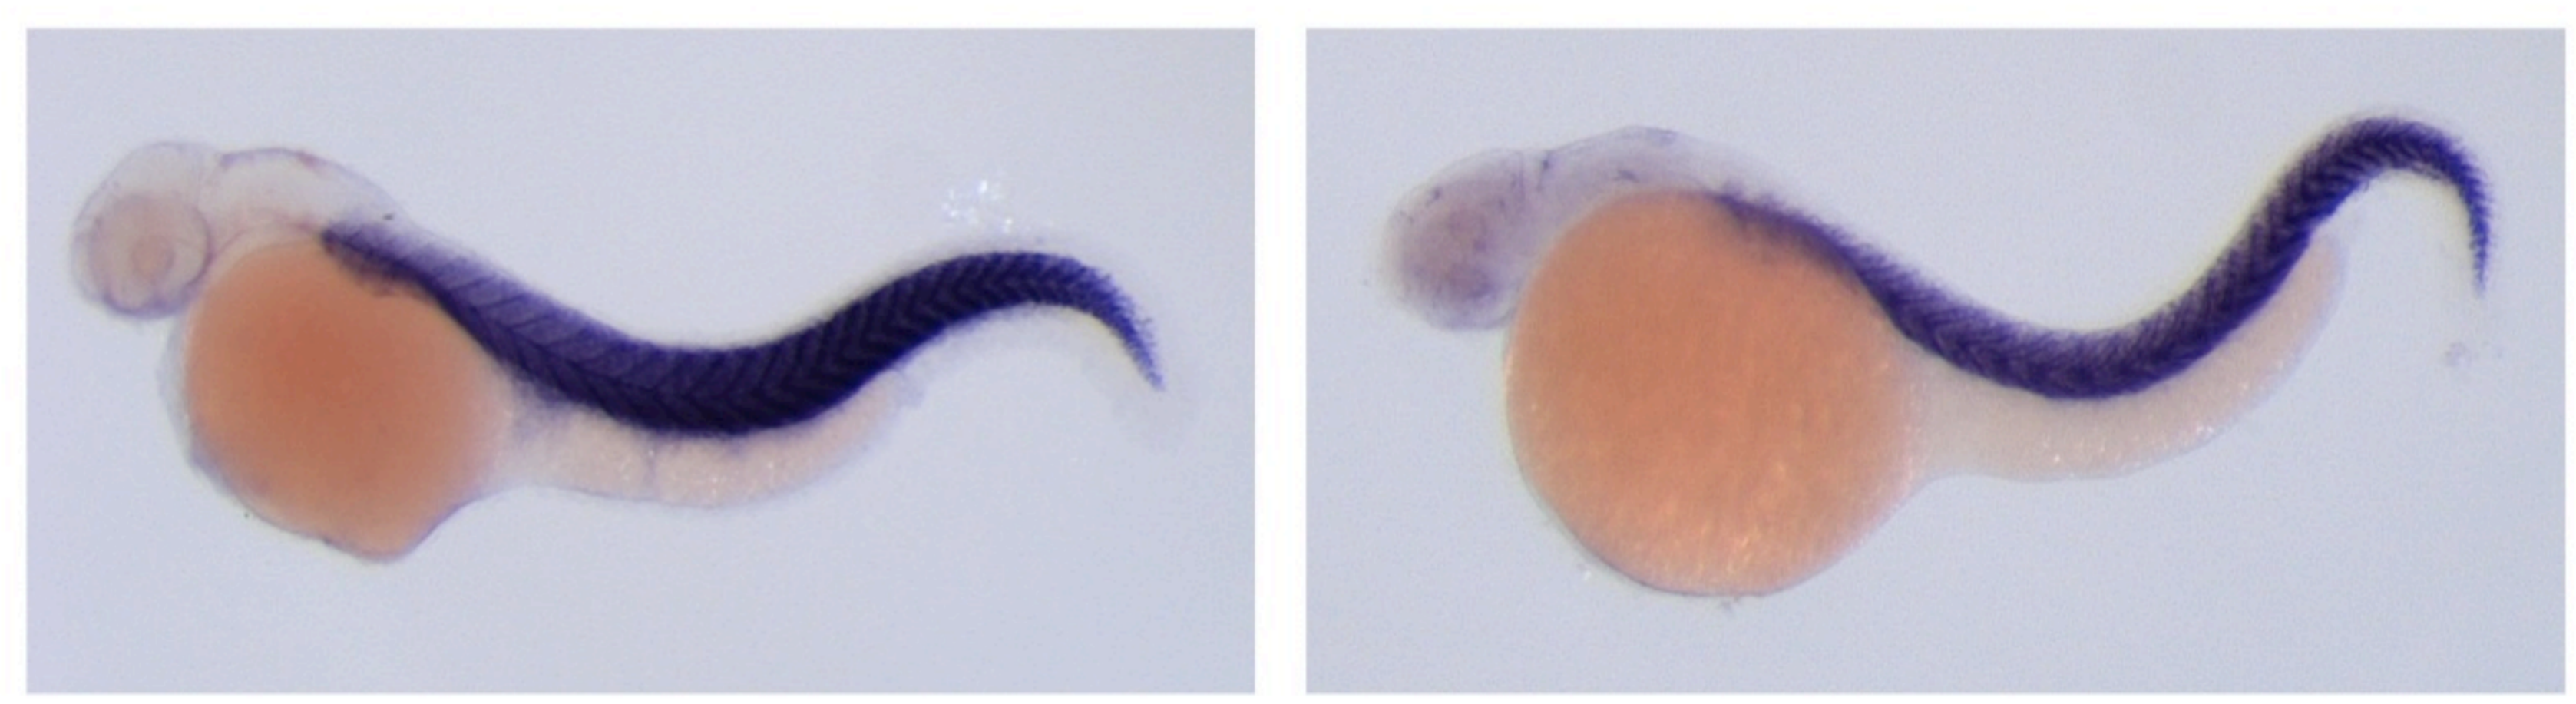**pax2**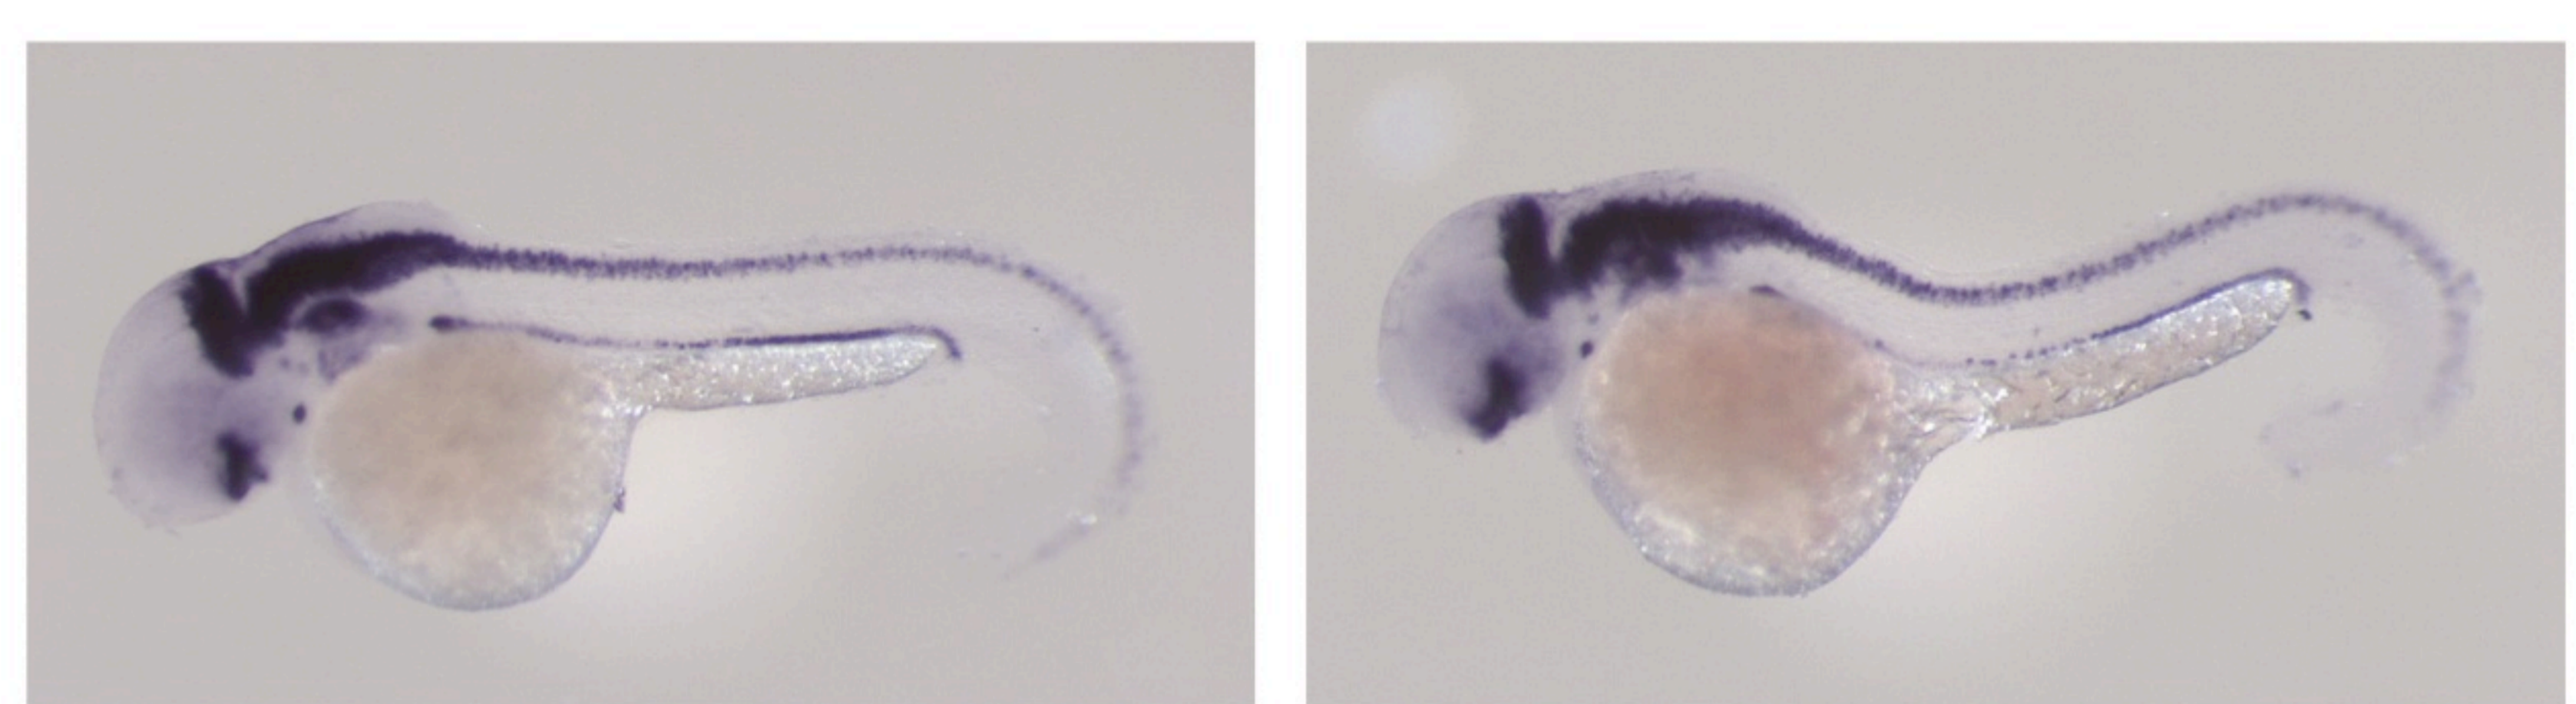**cmhc**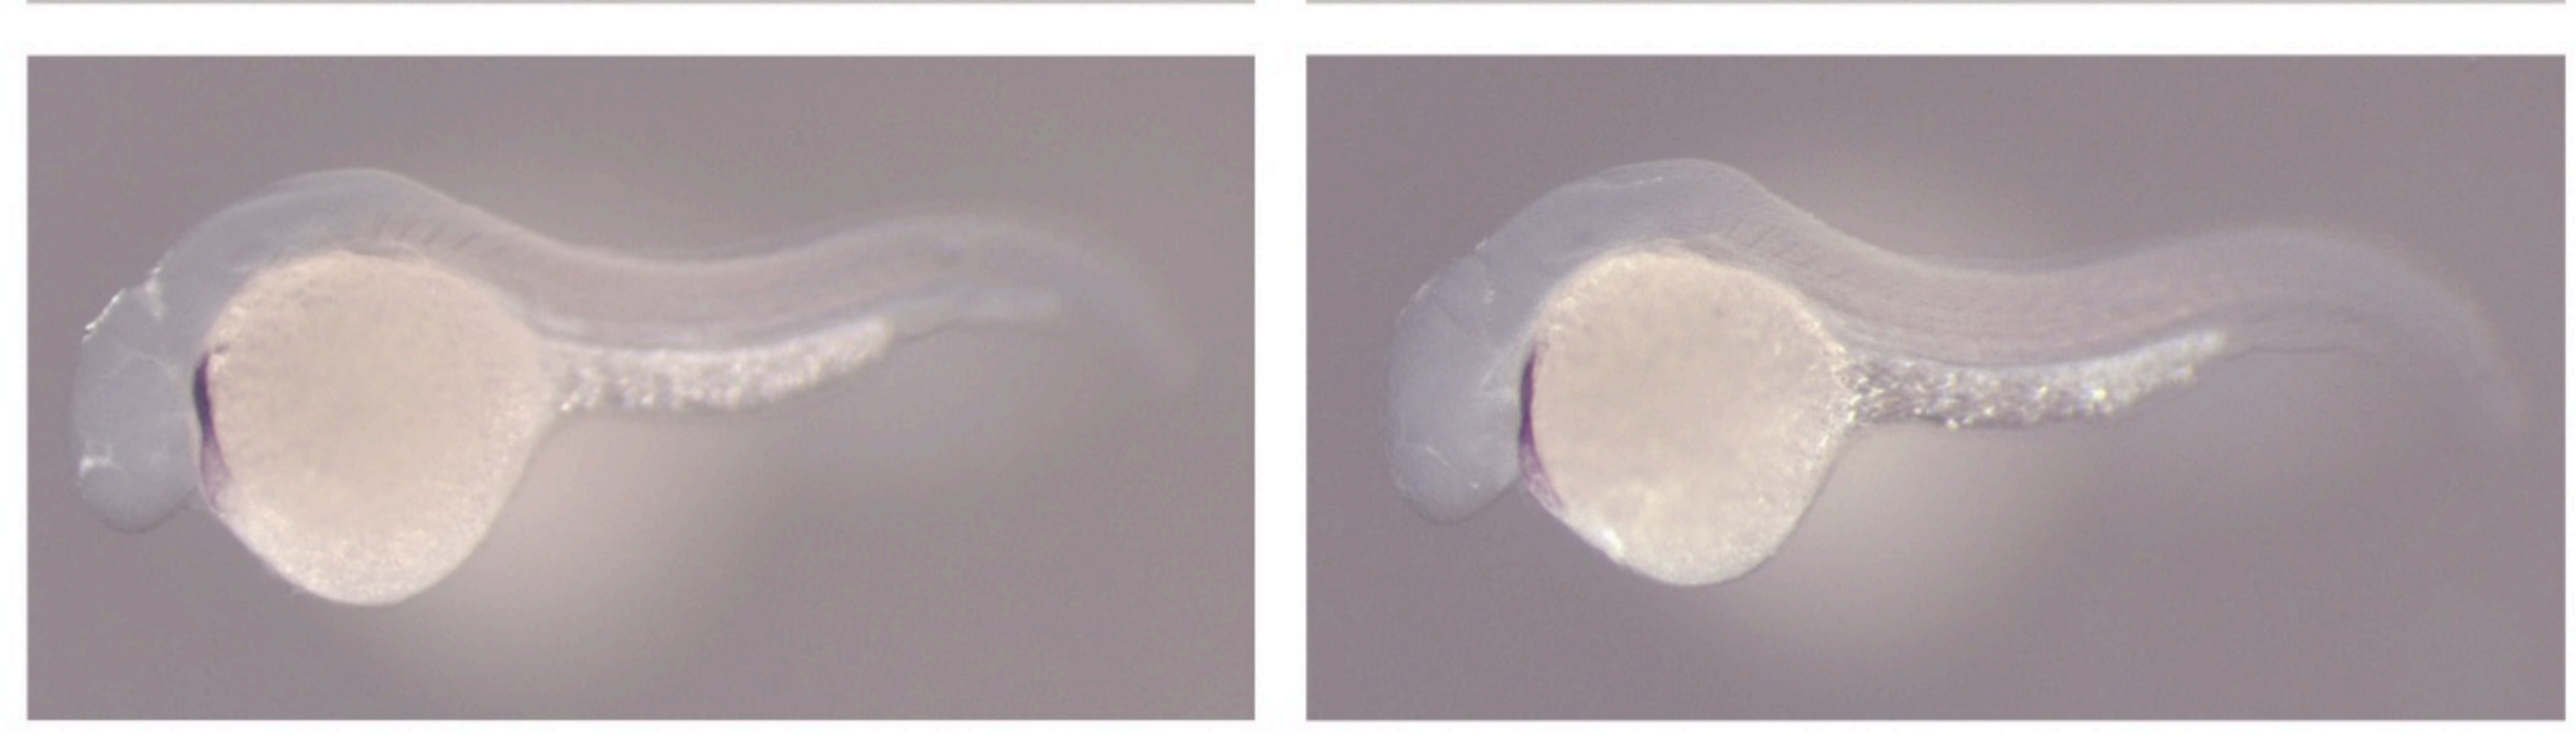**foxA3**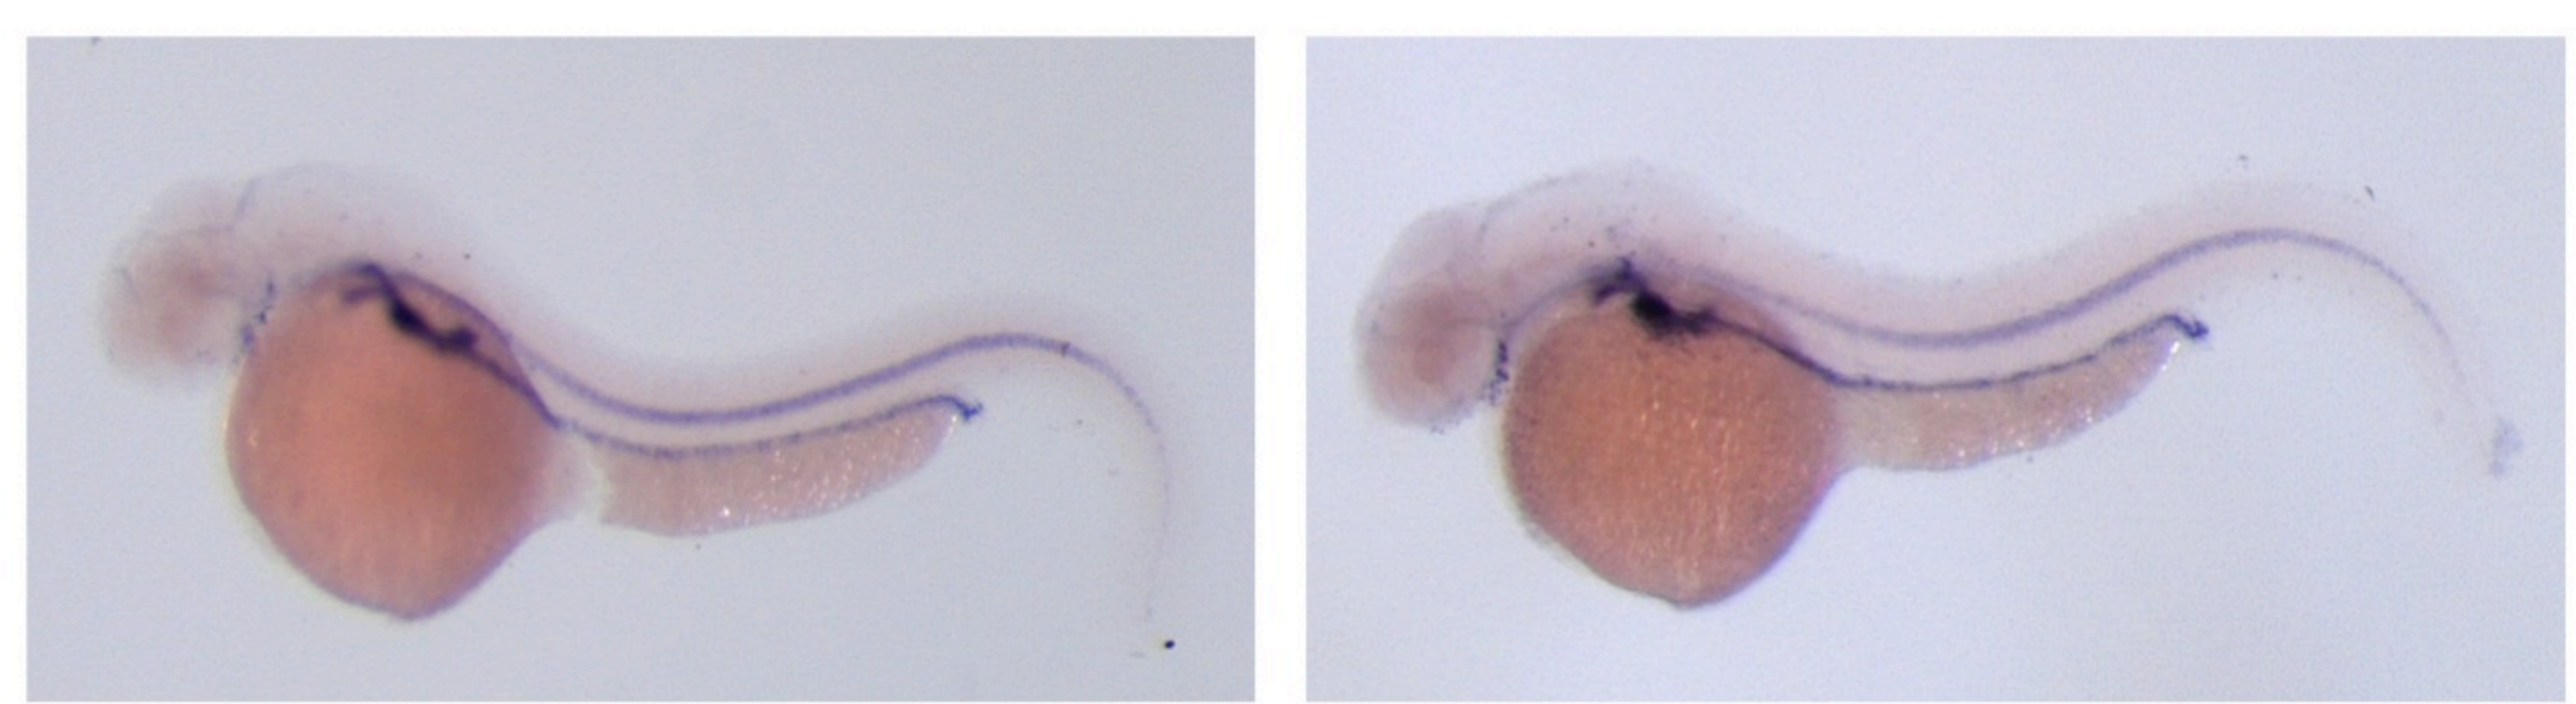**huc**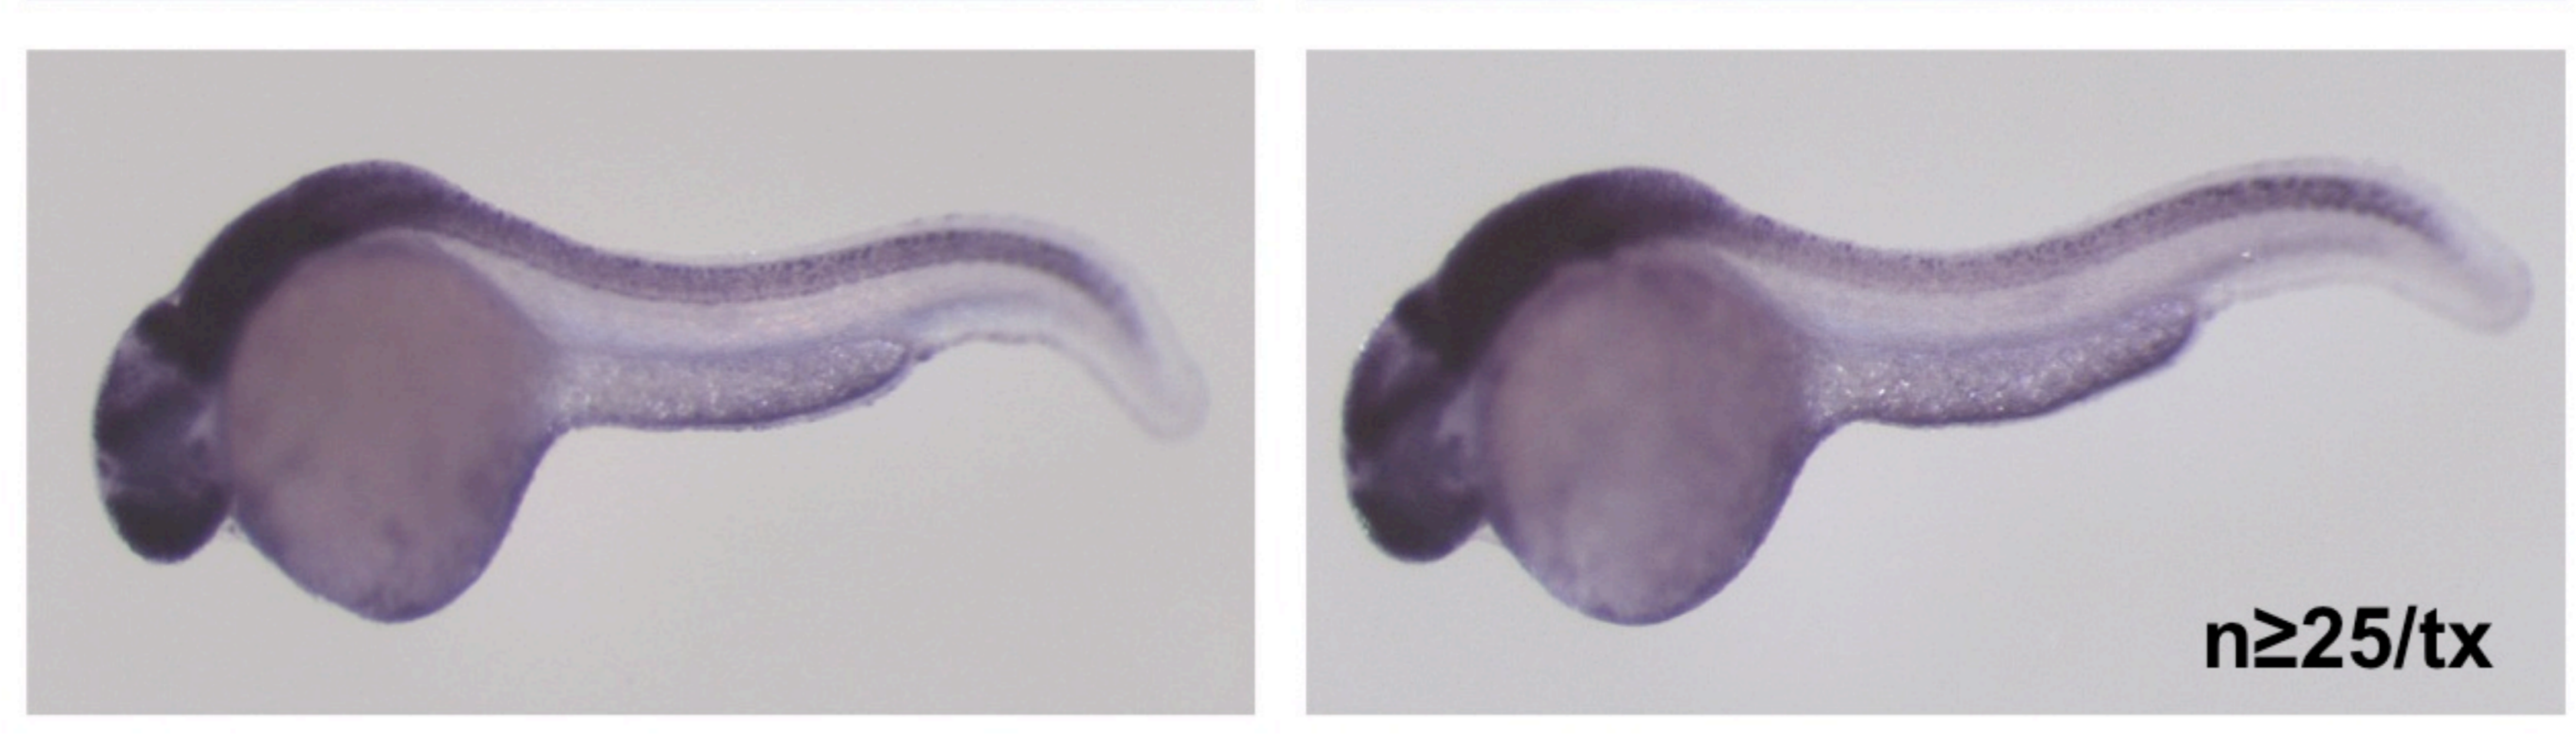**36hpf****n≥25/tx**

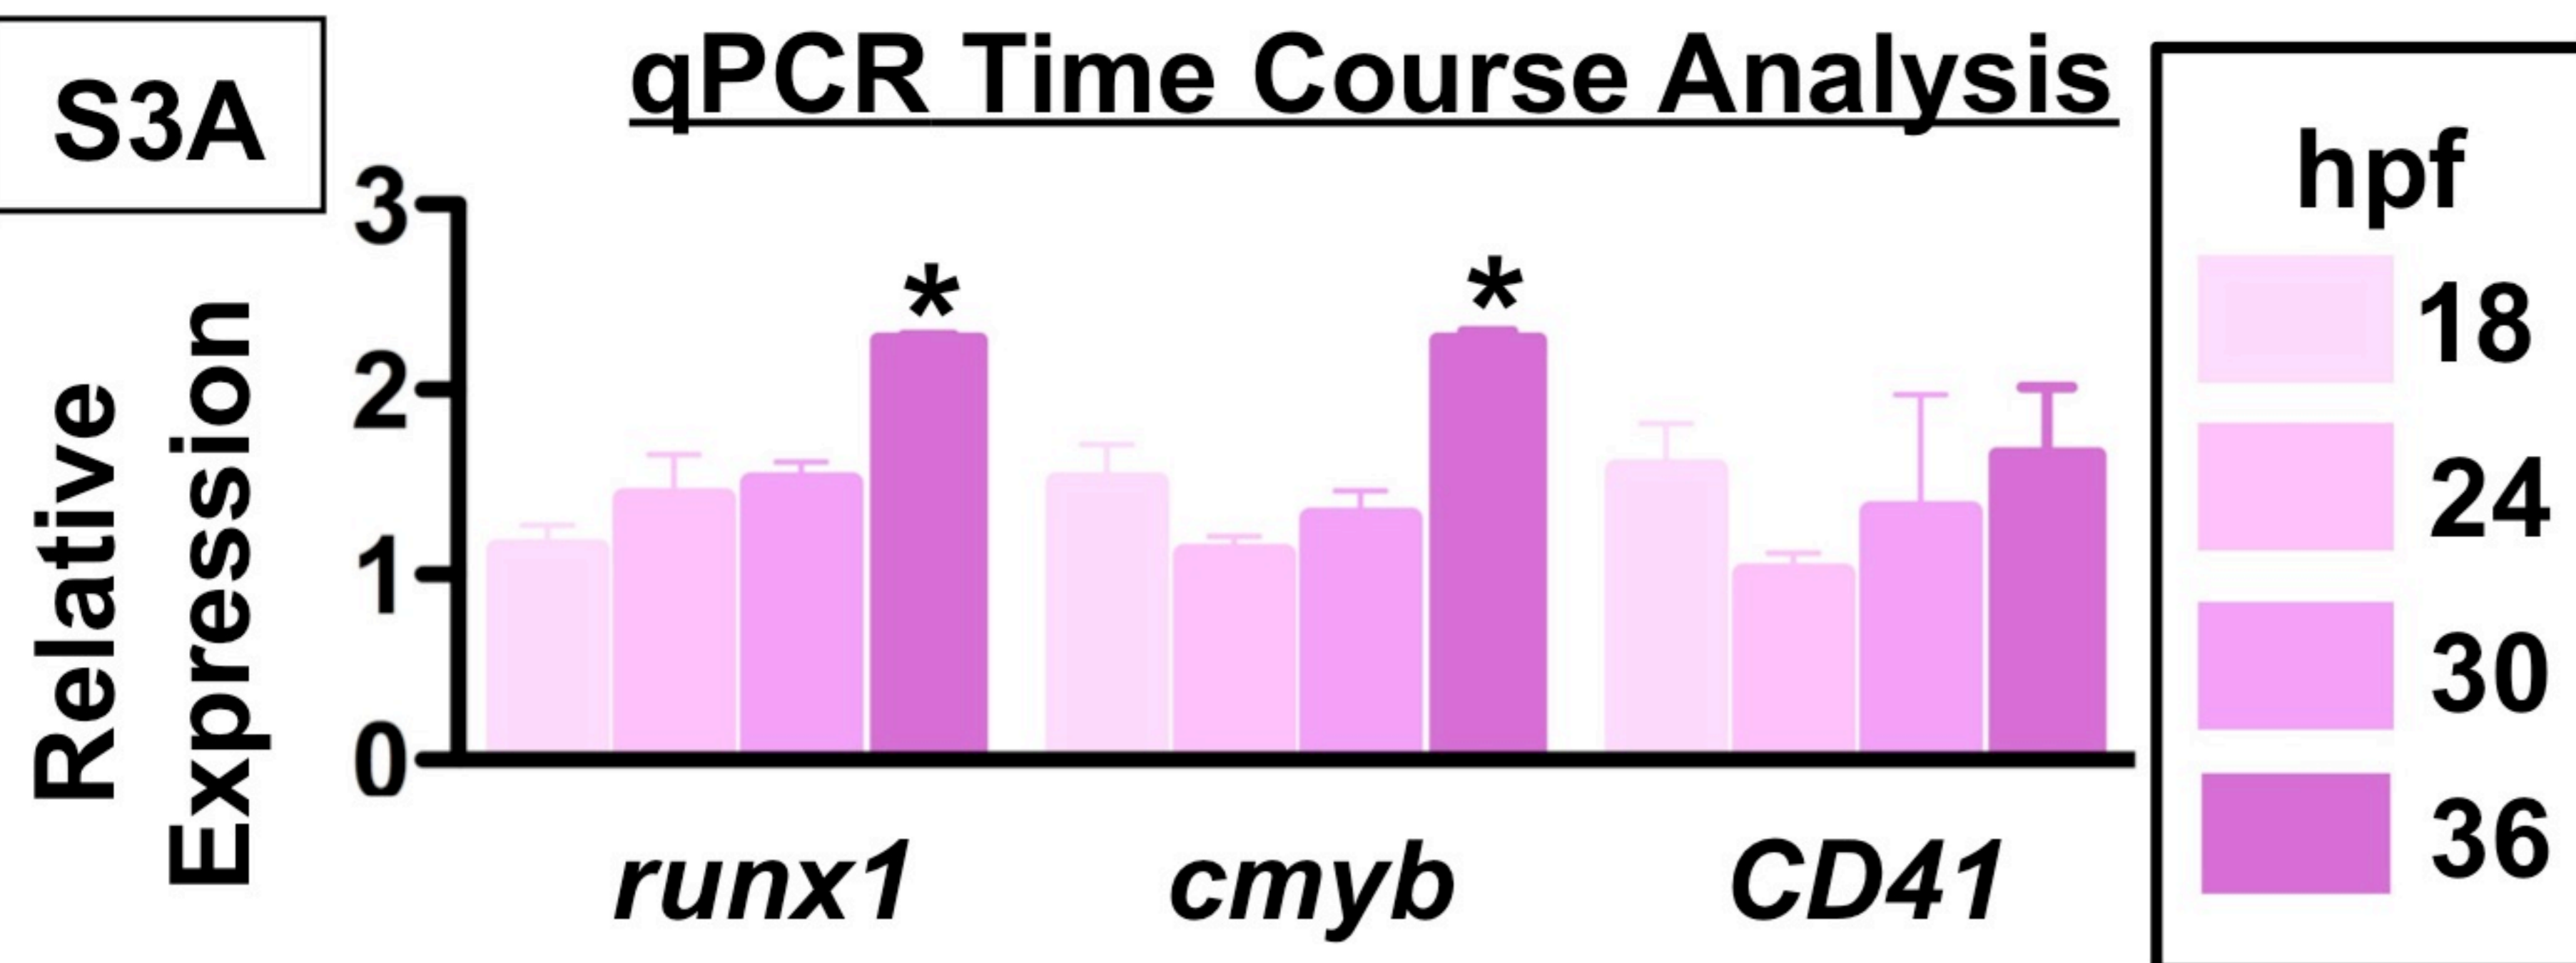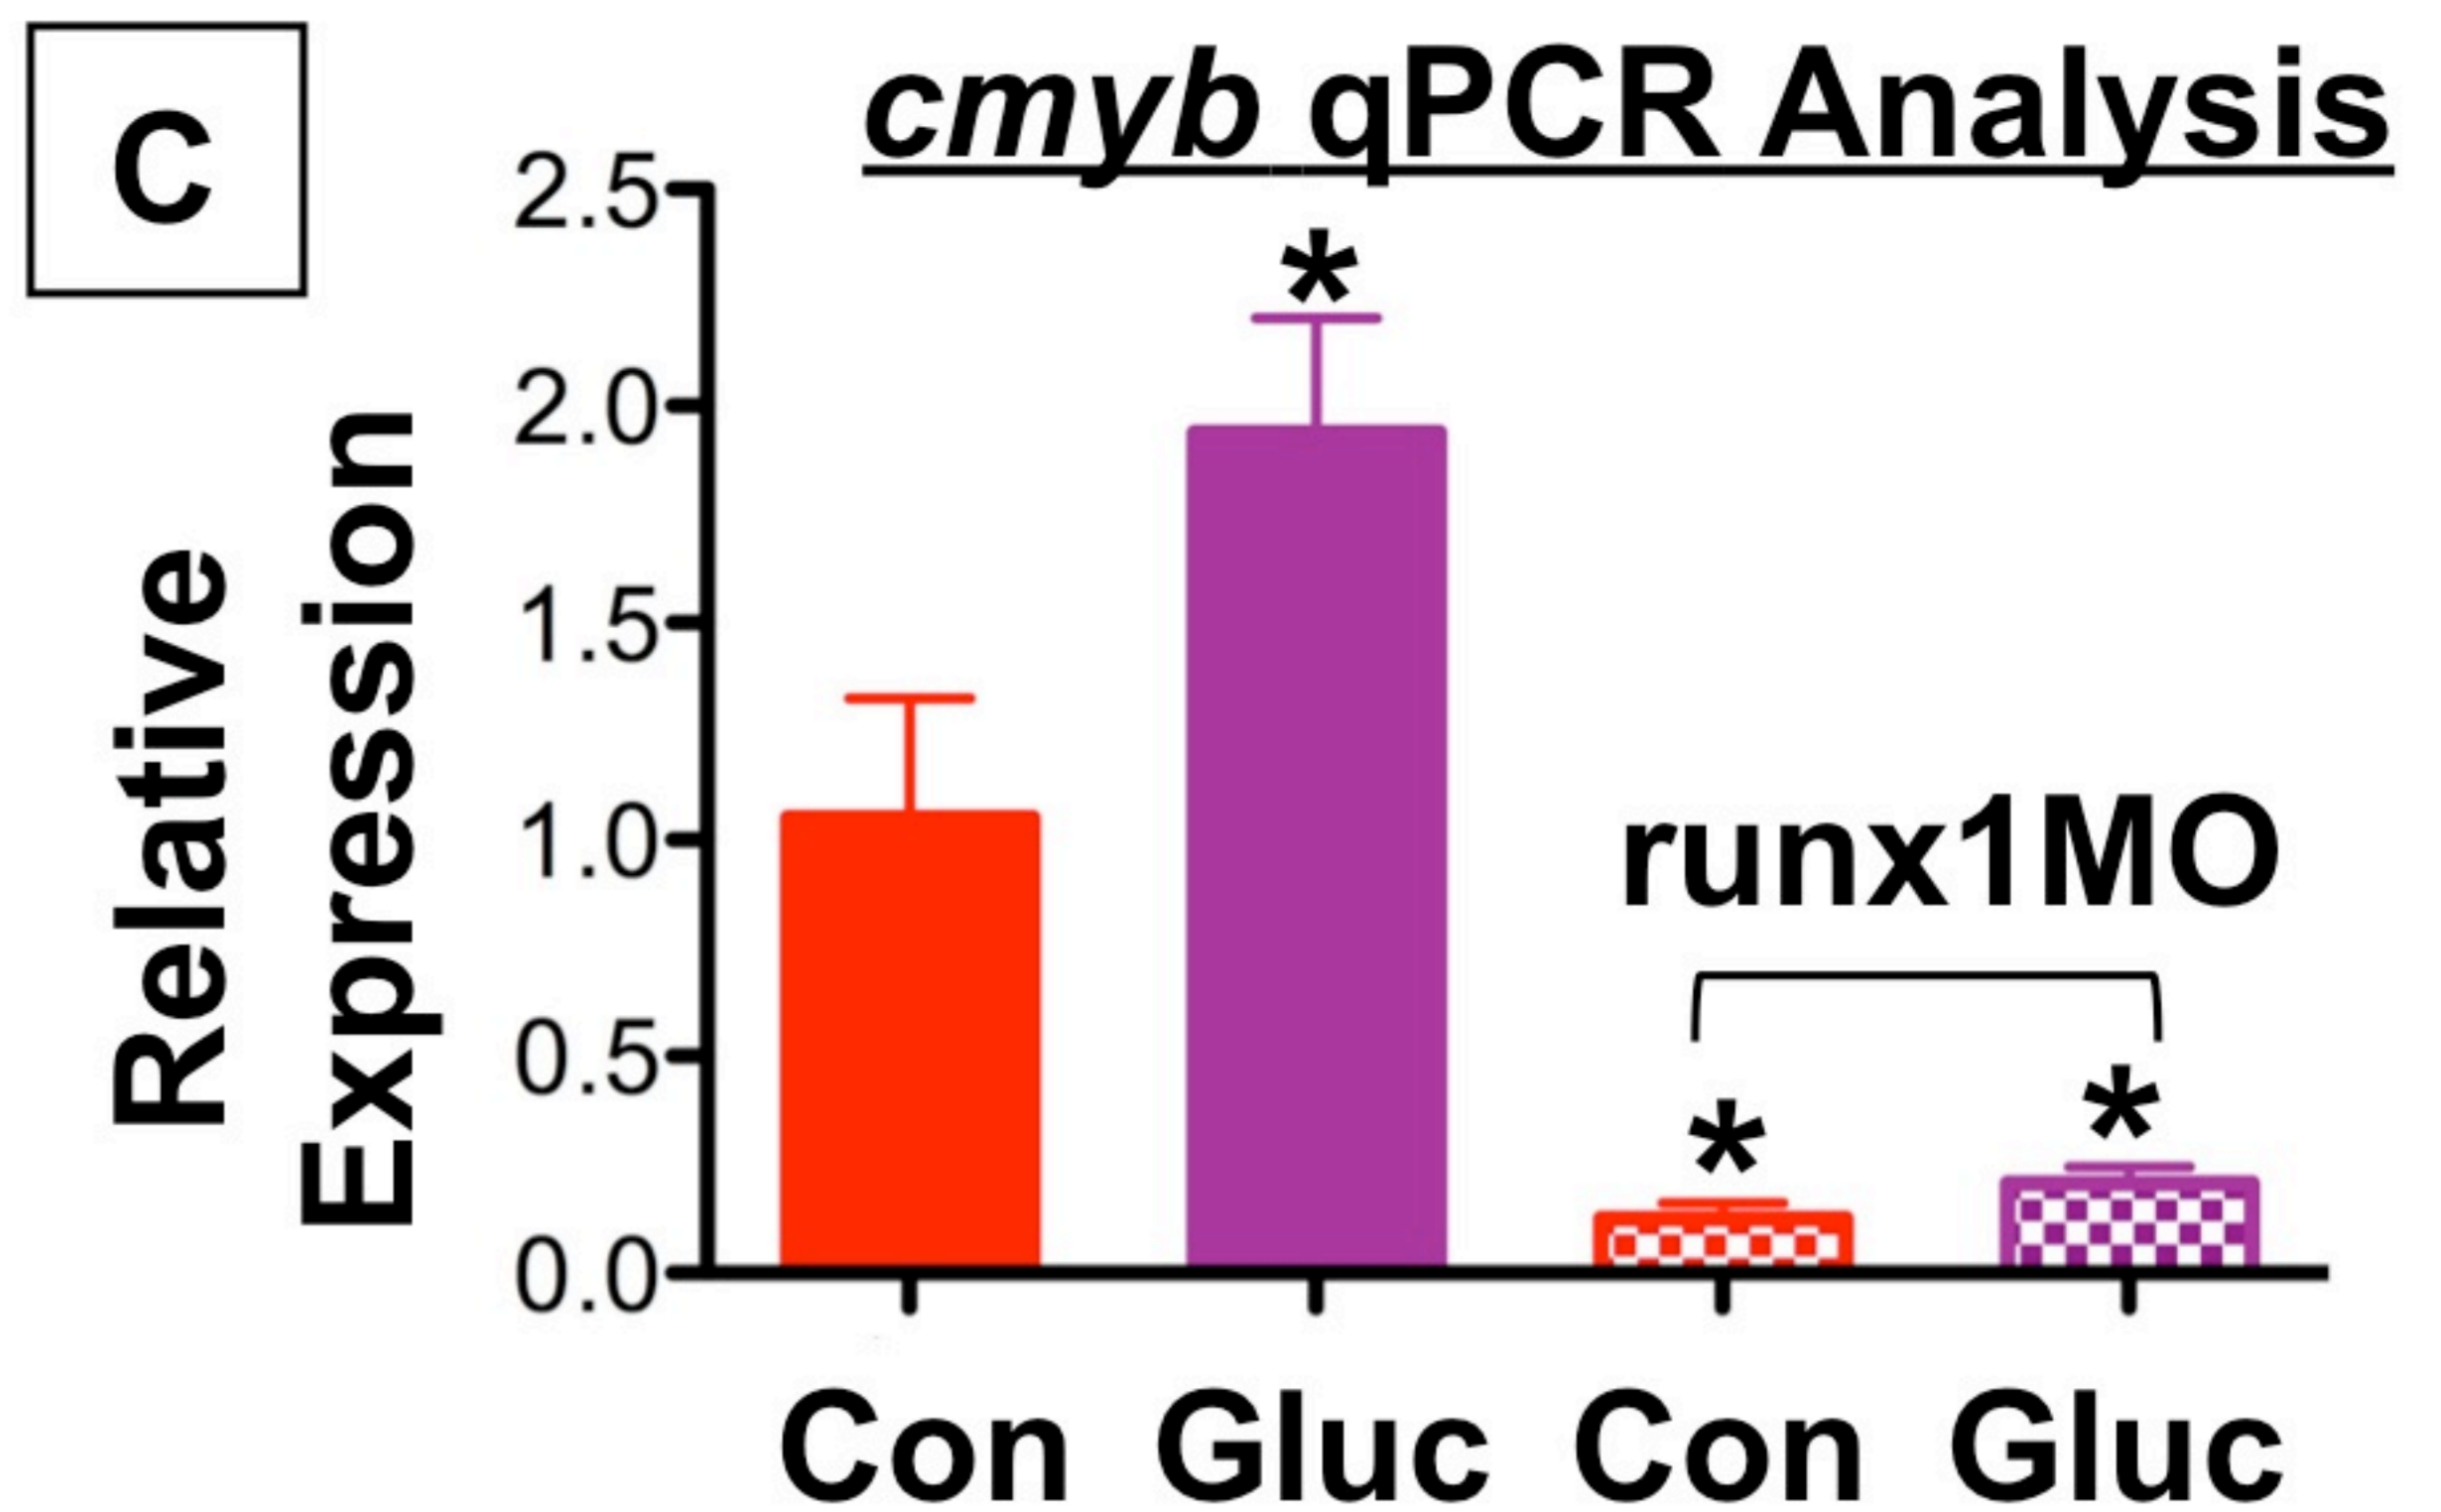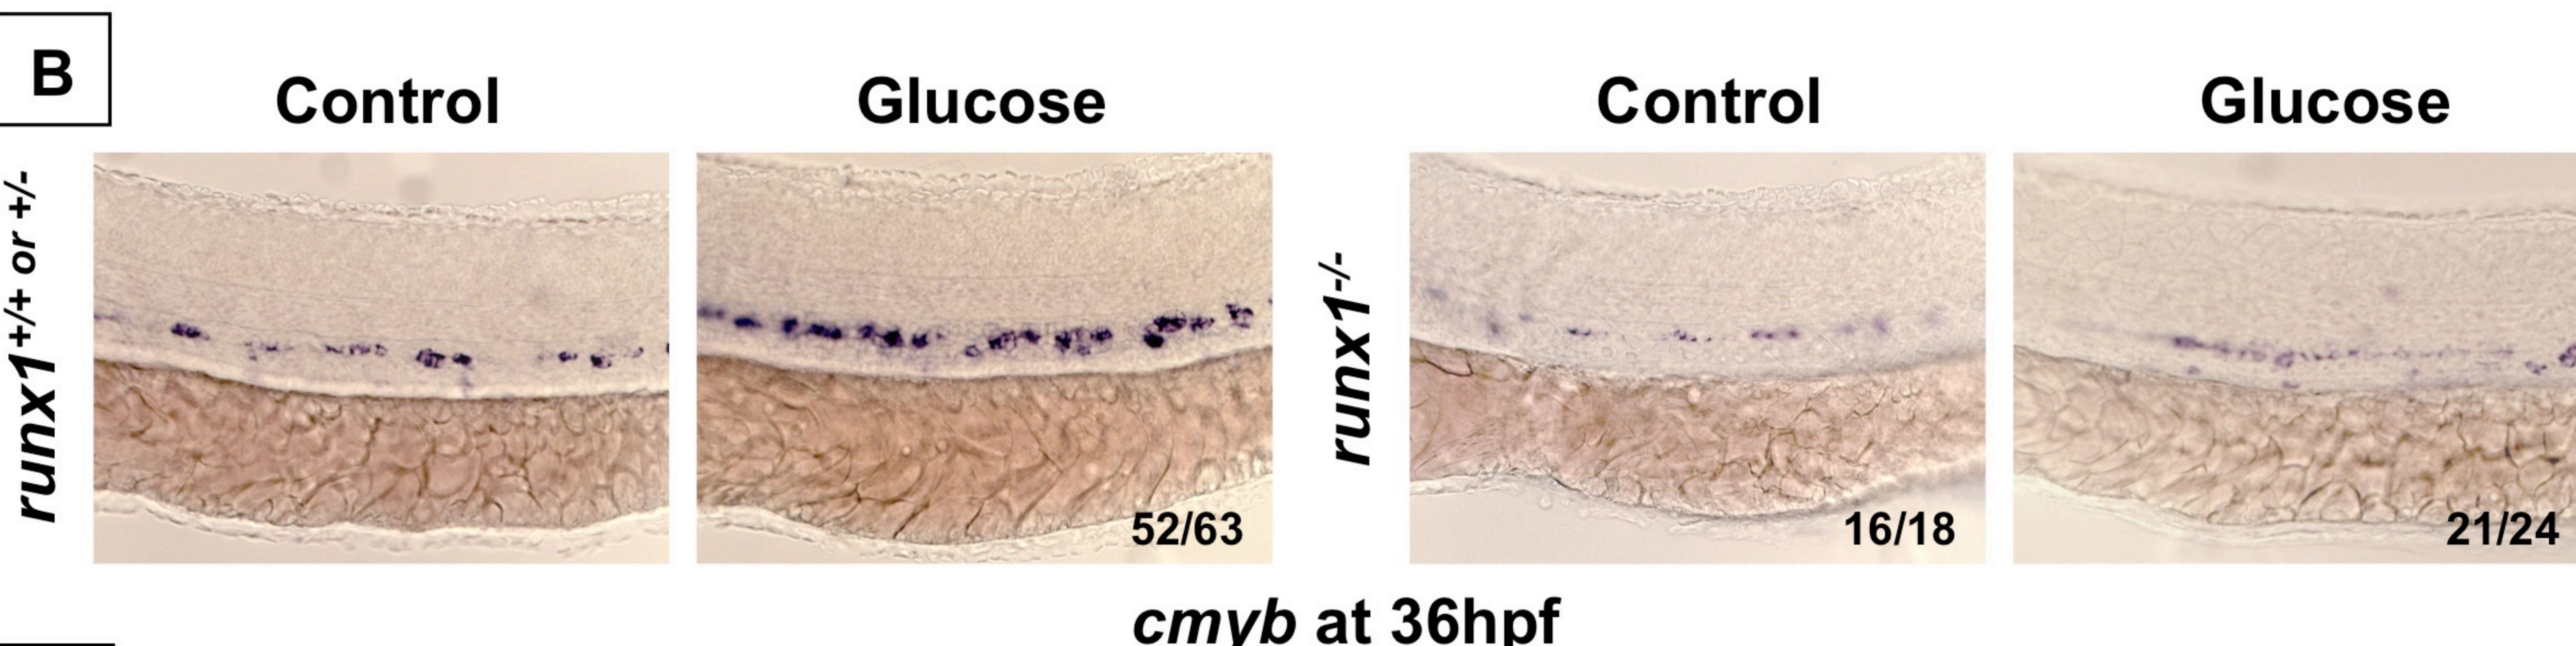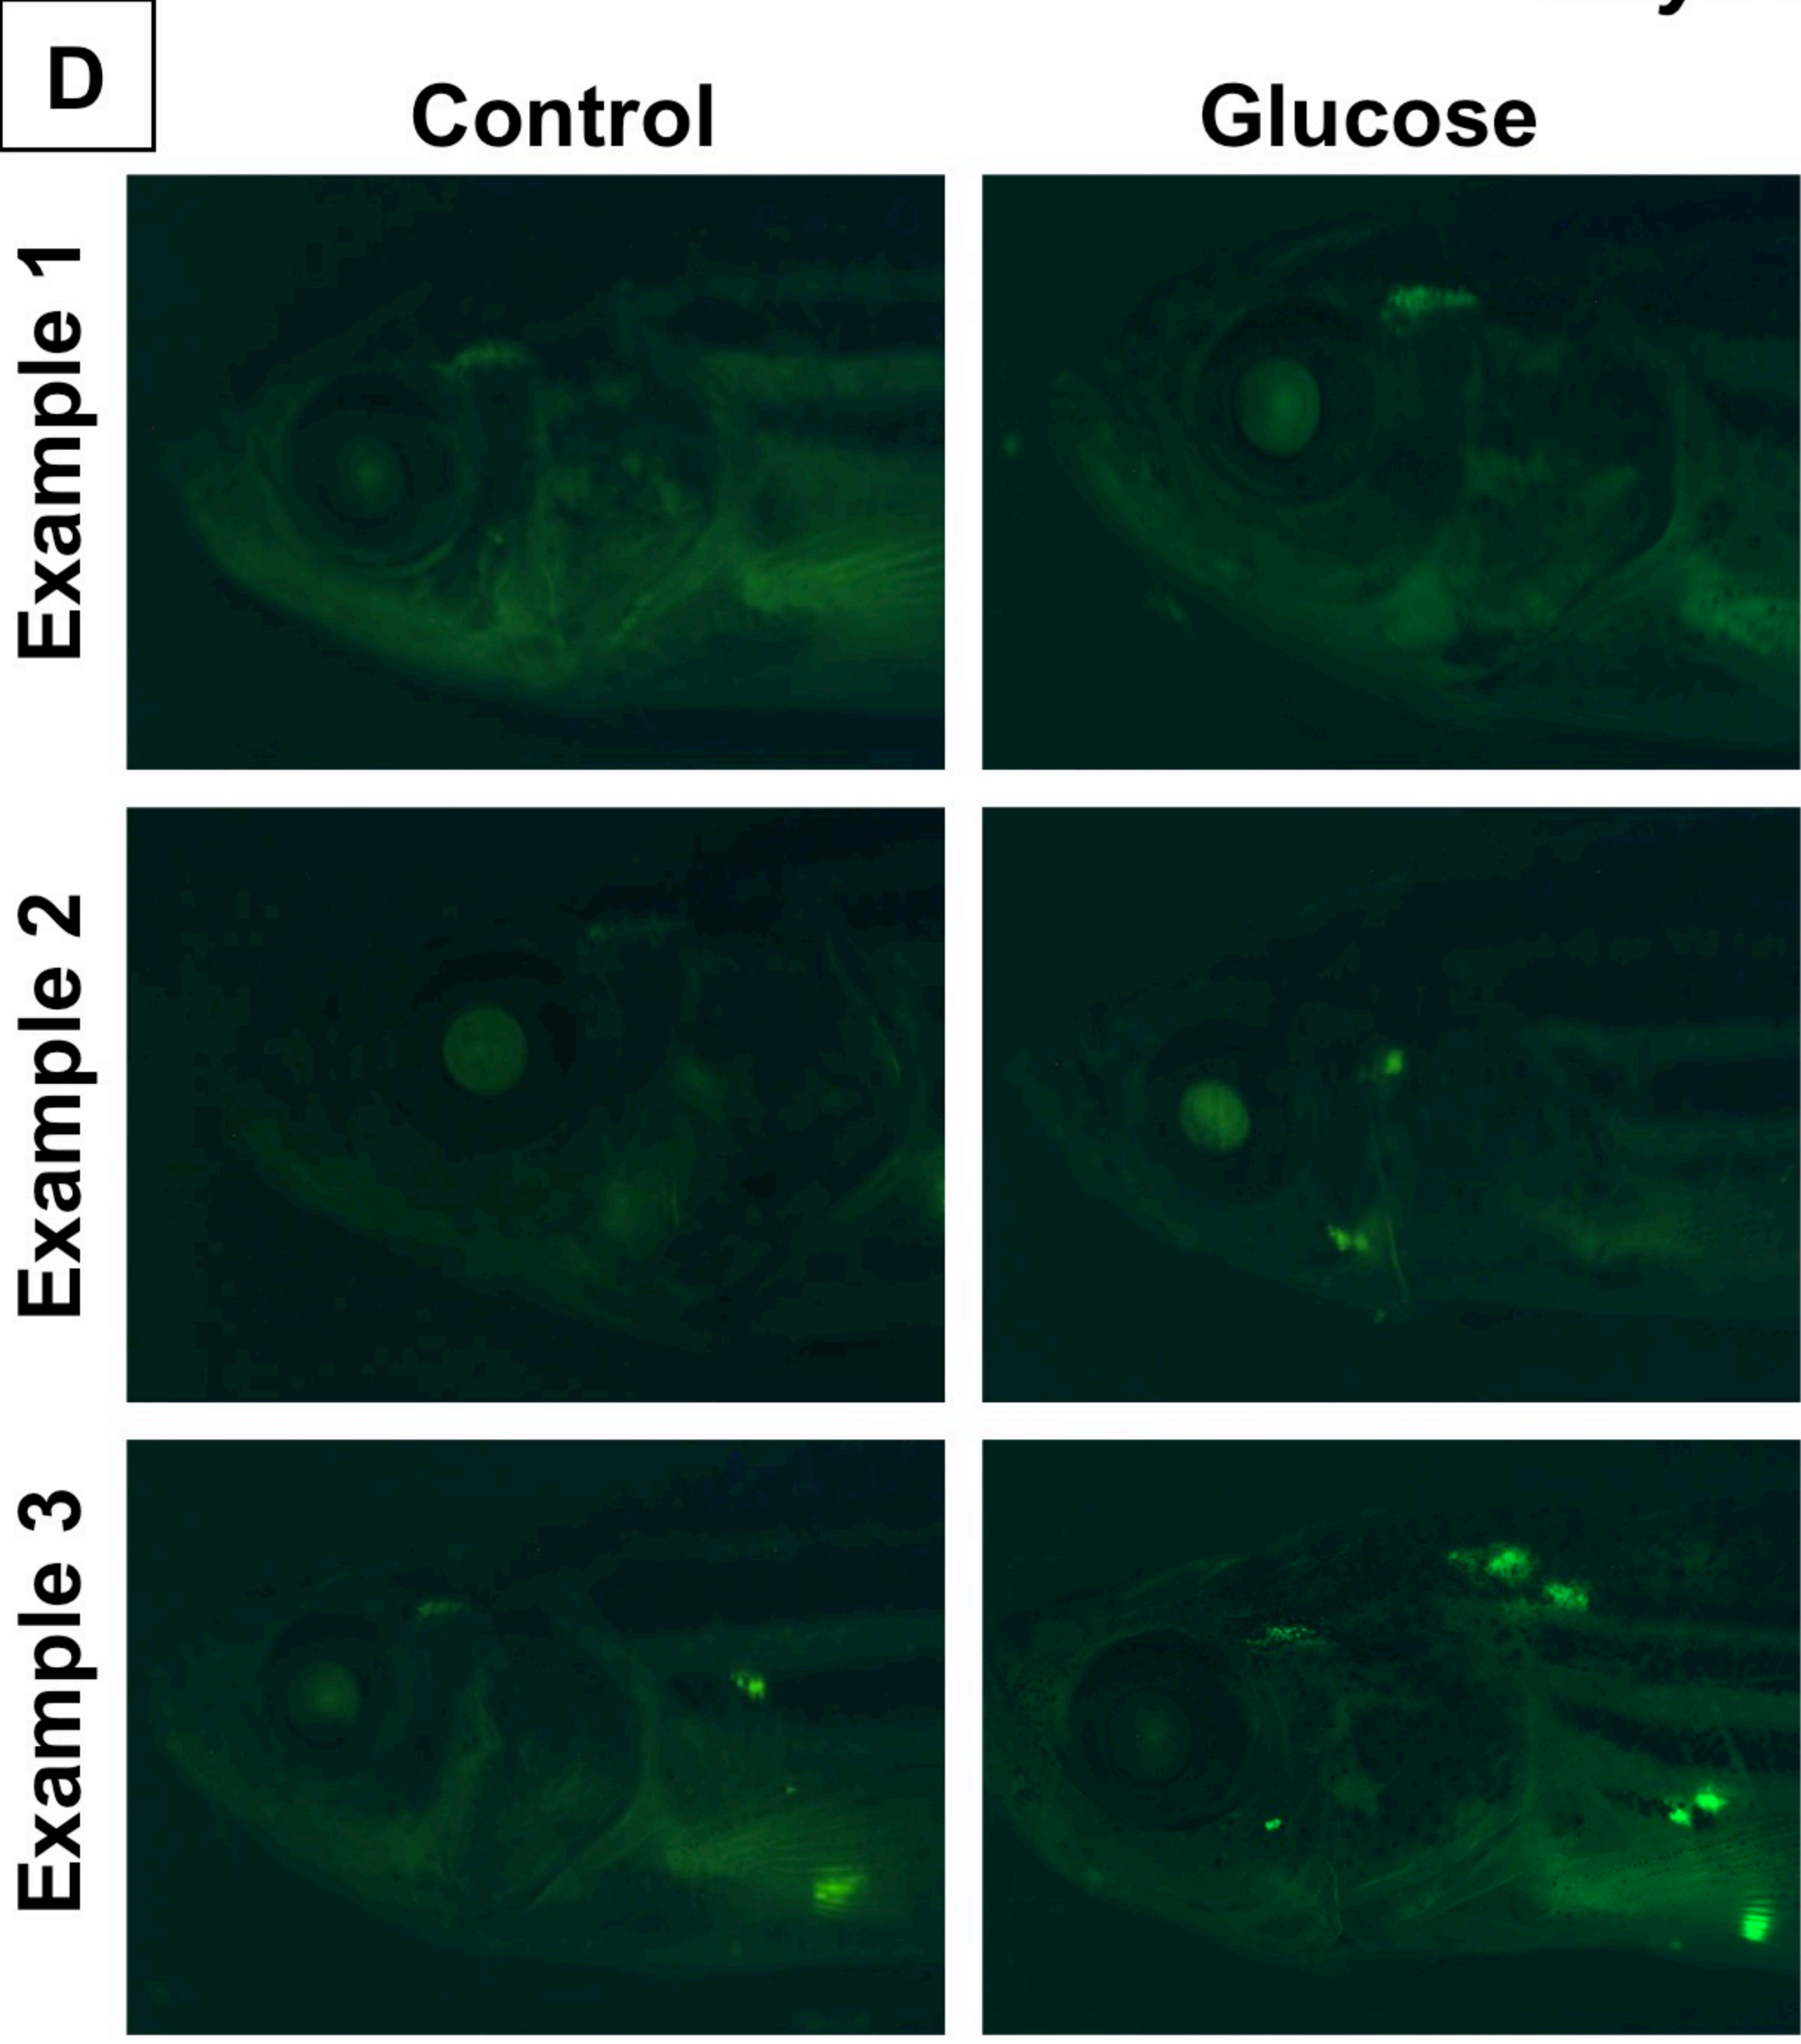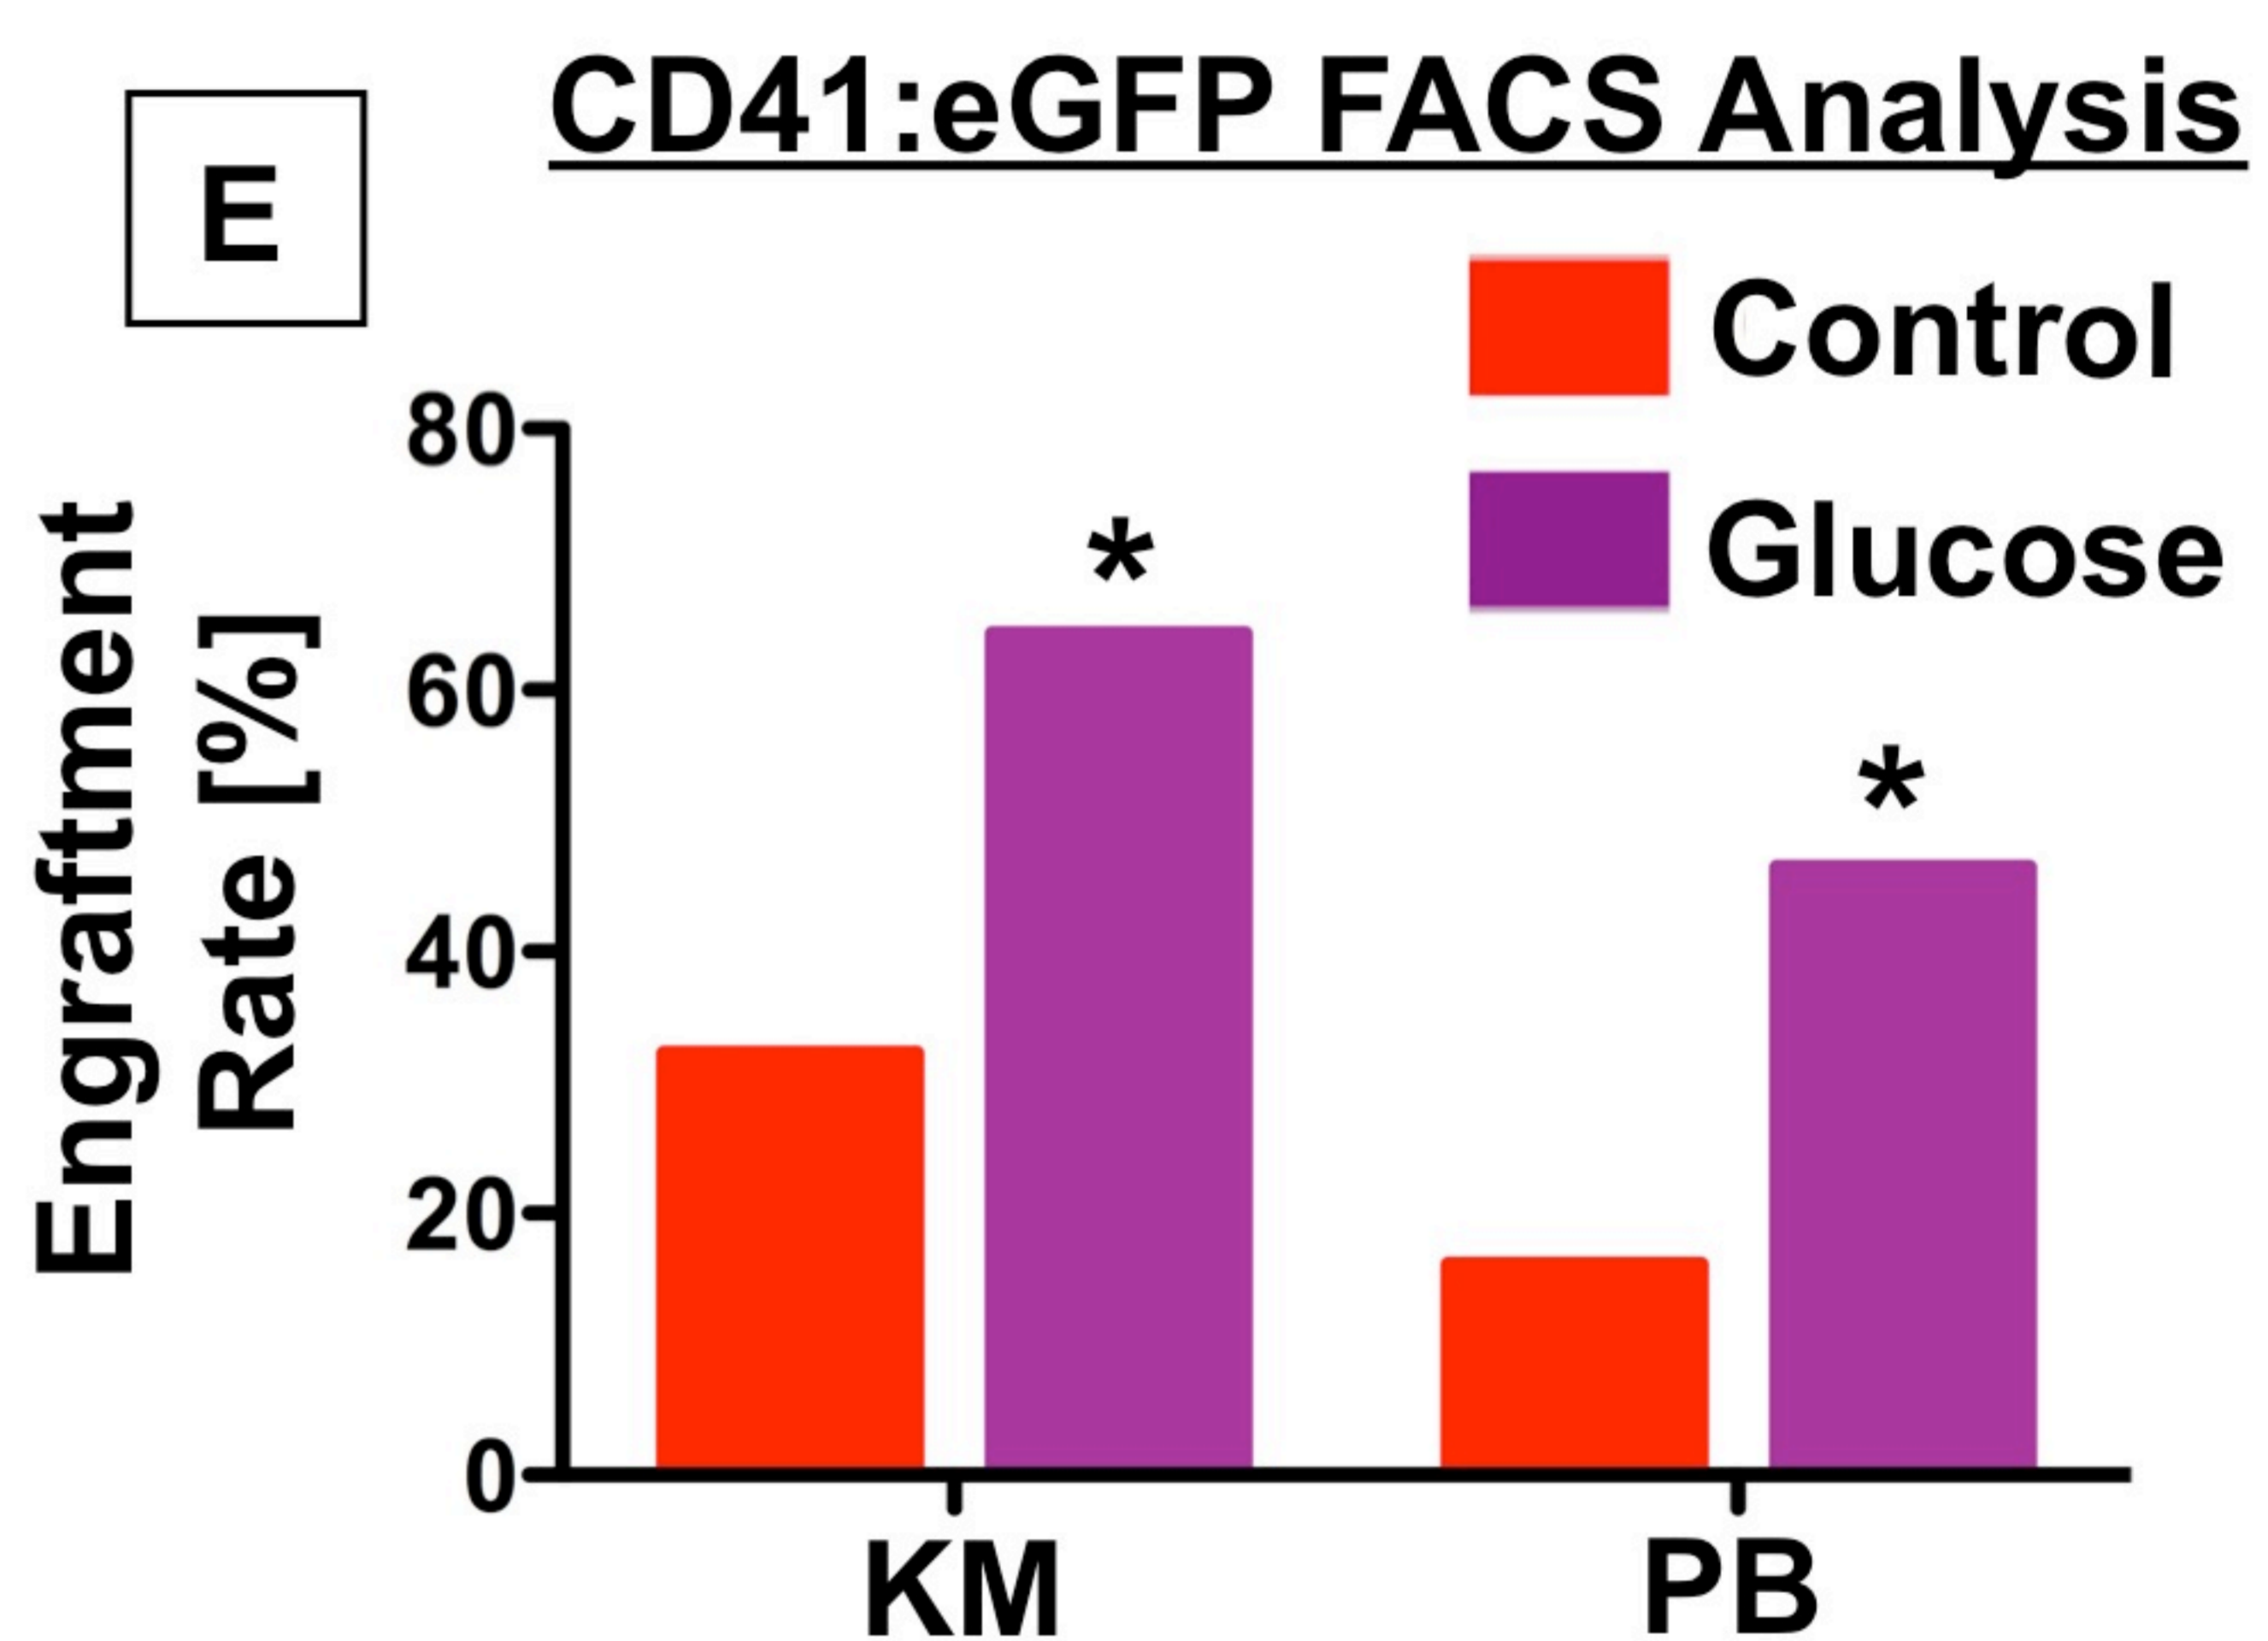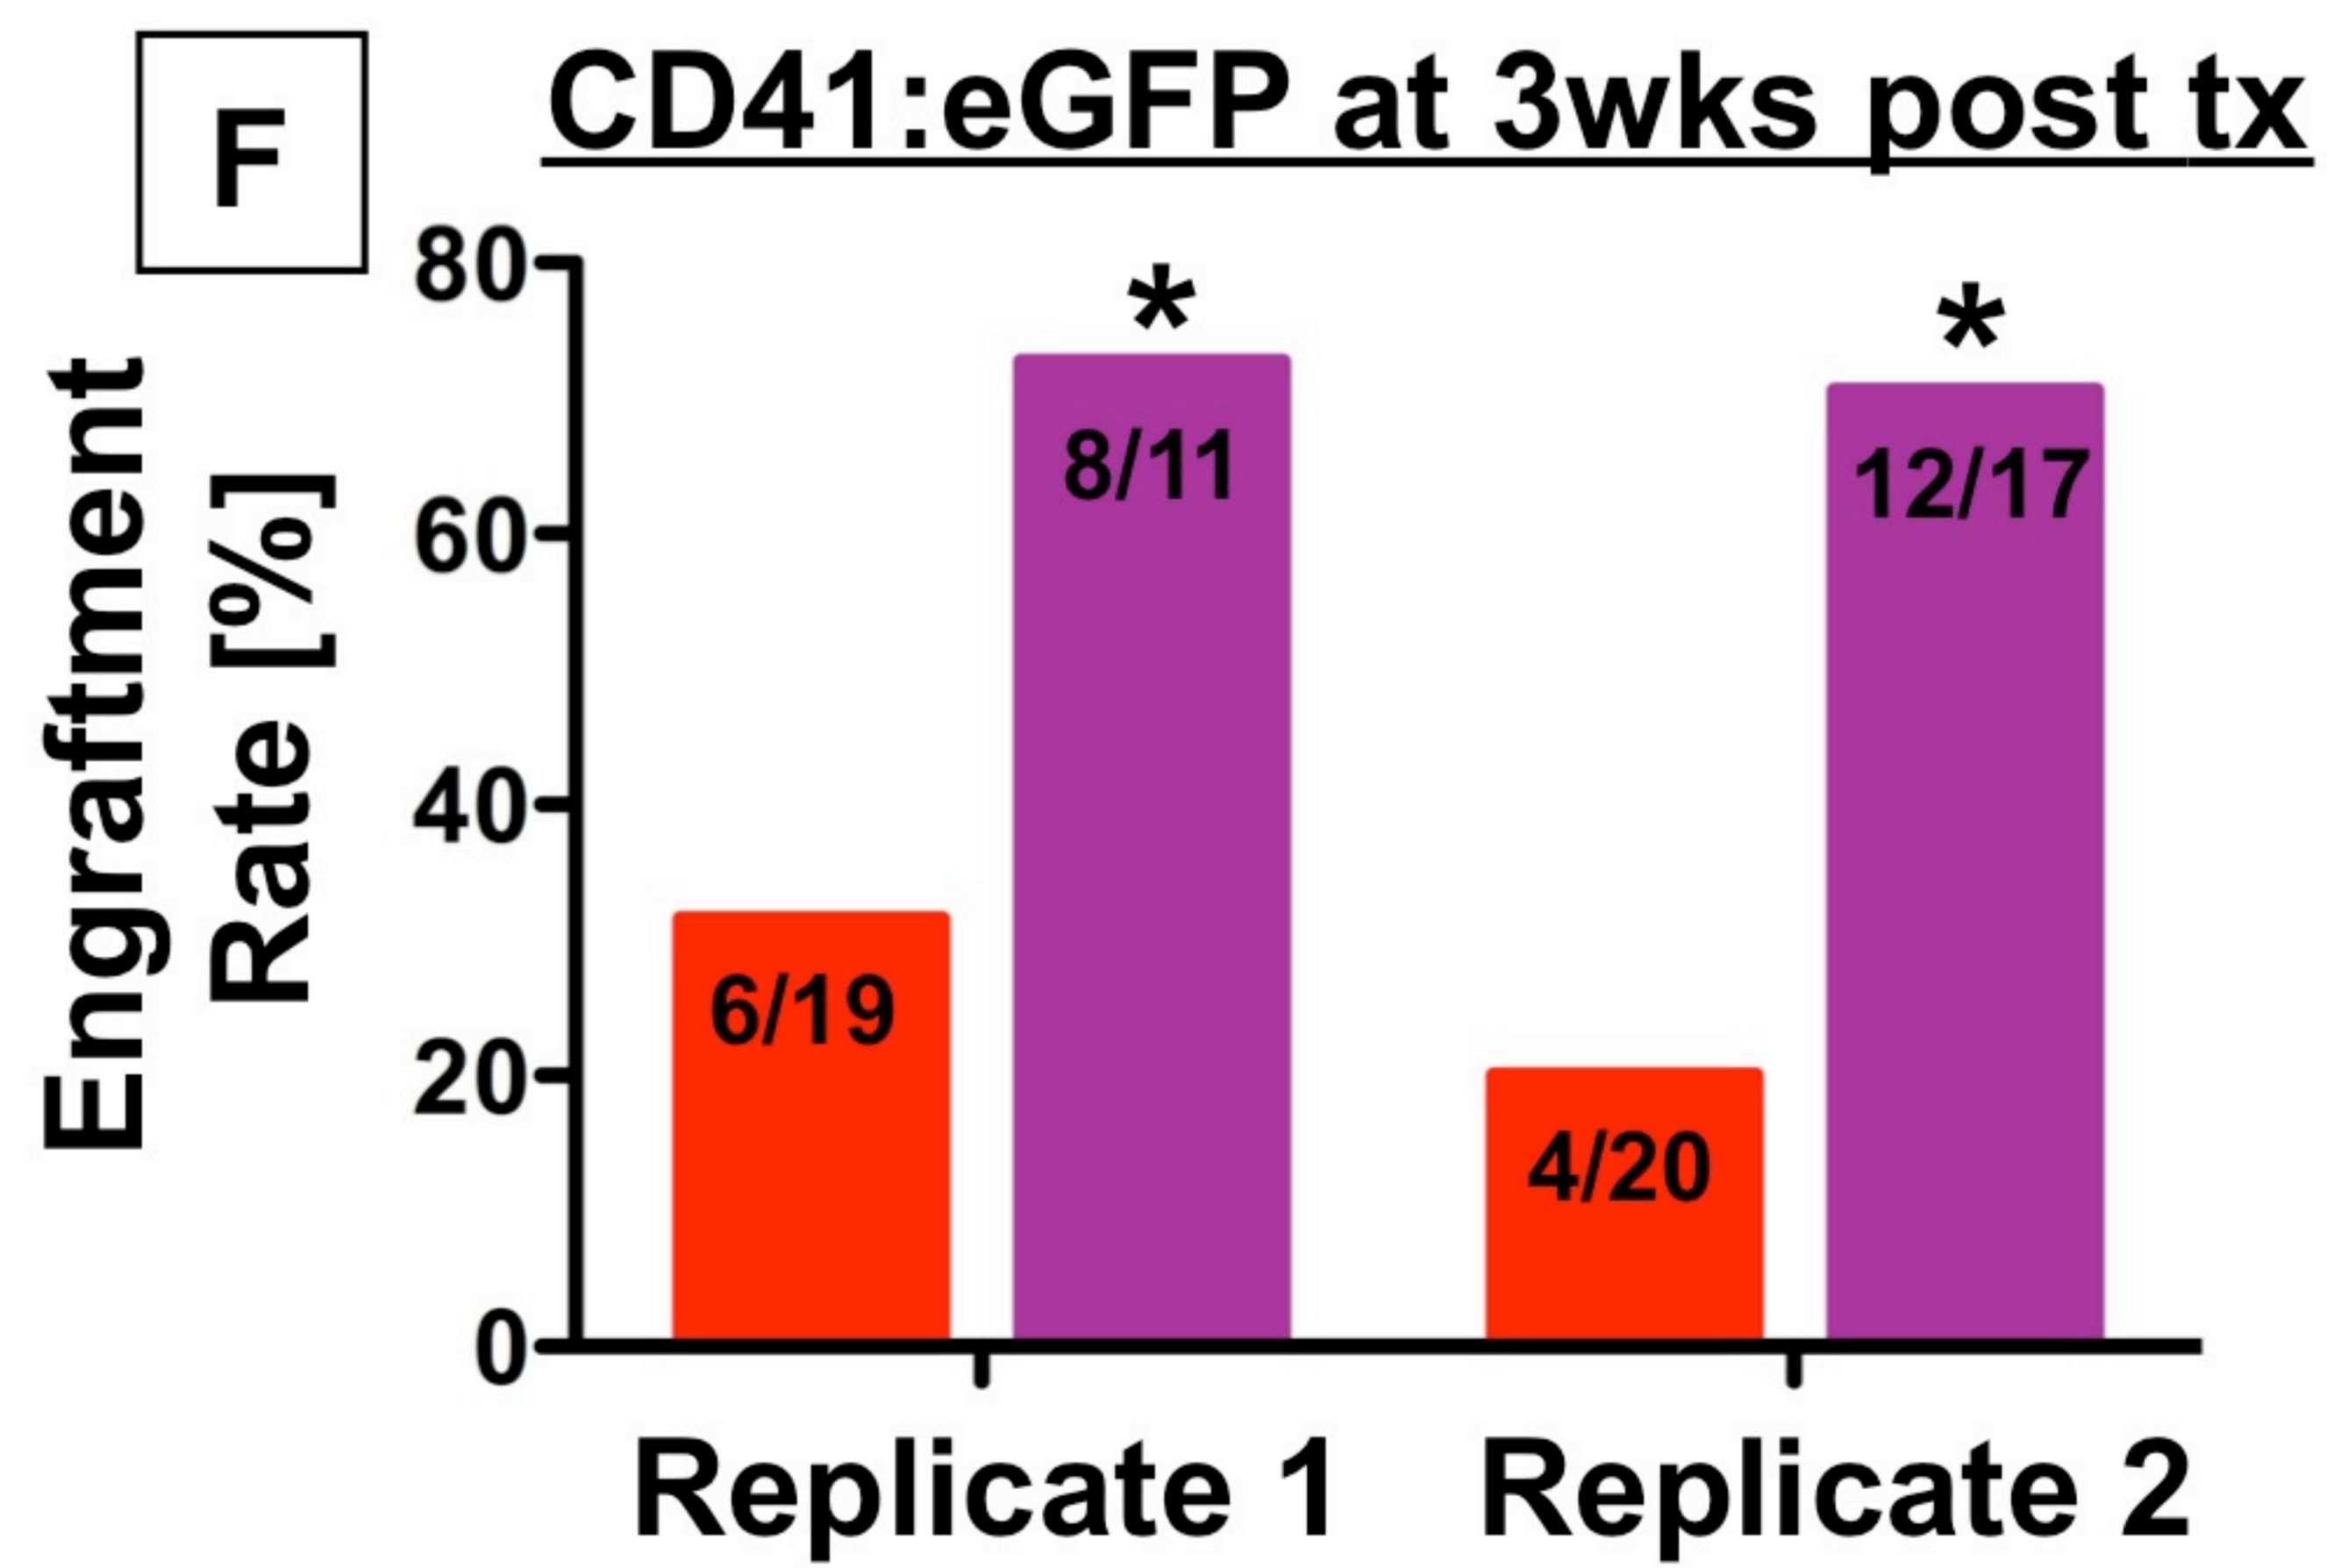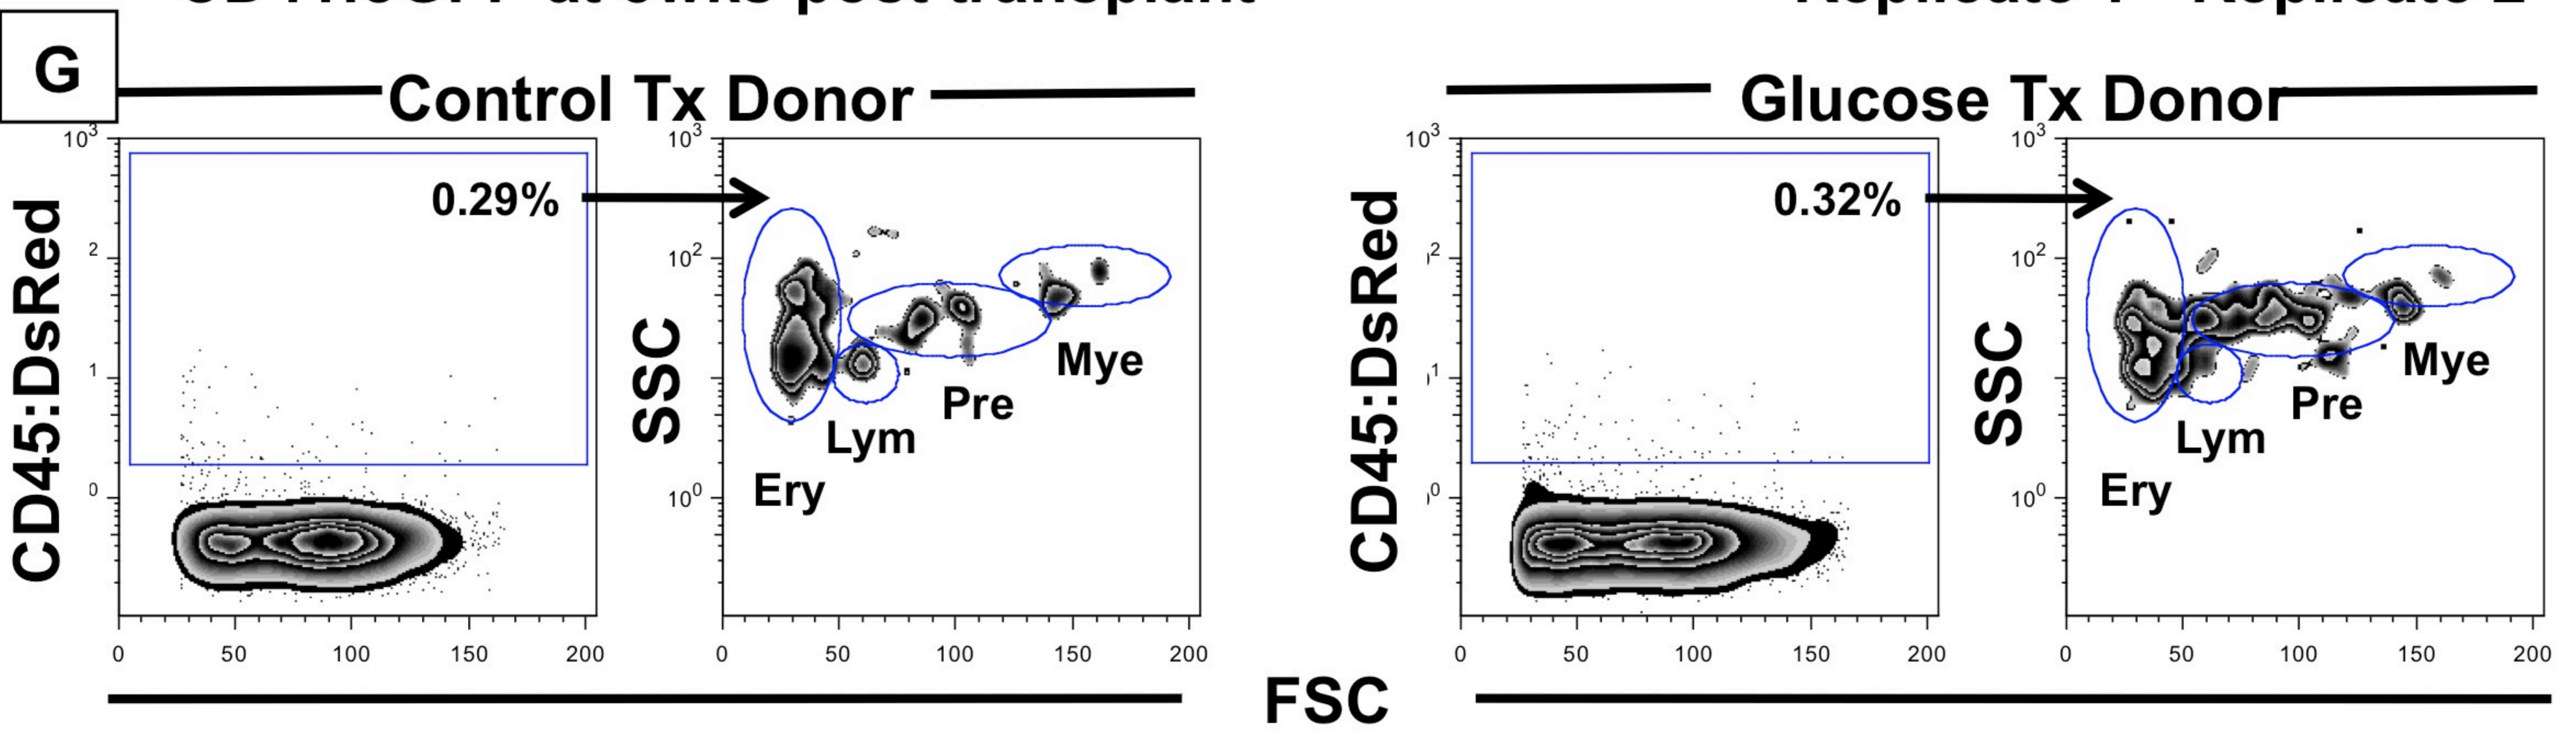

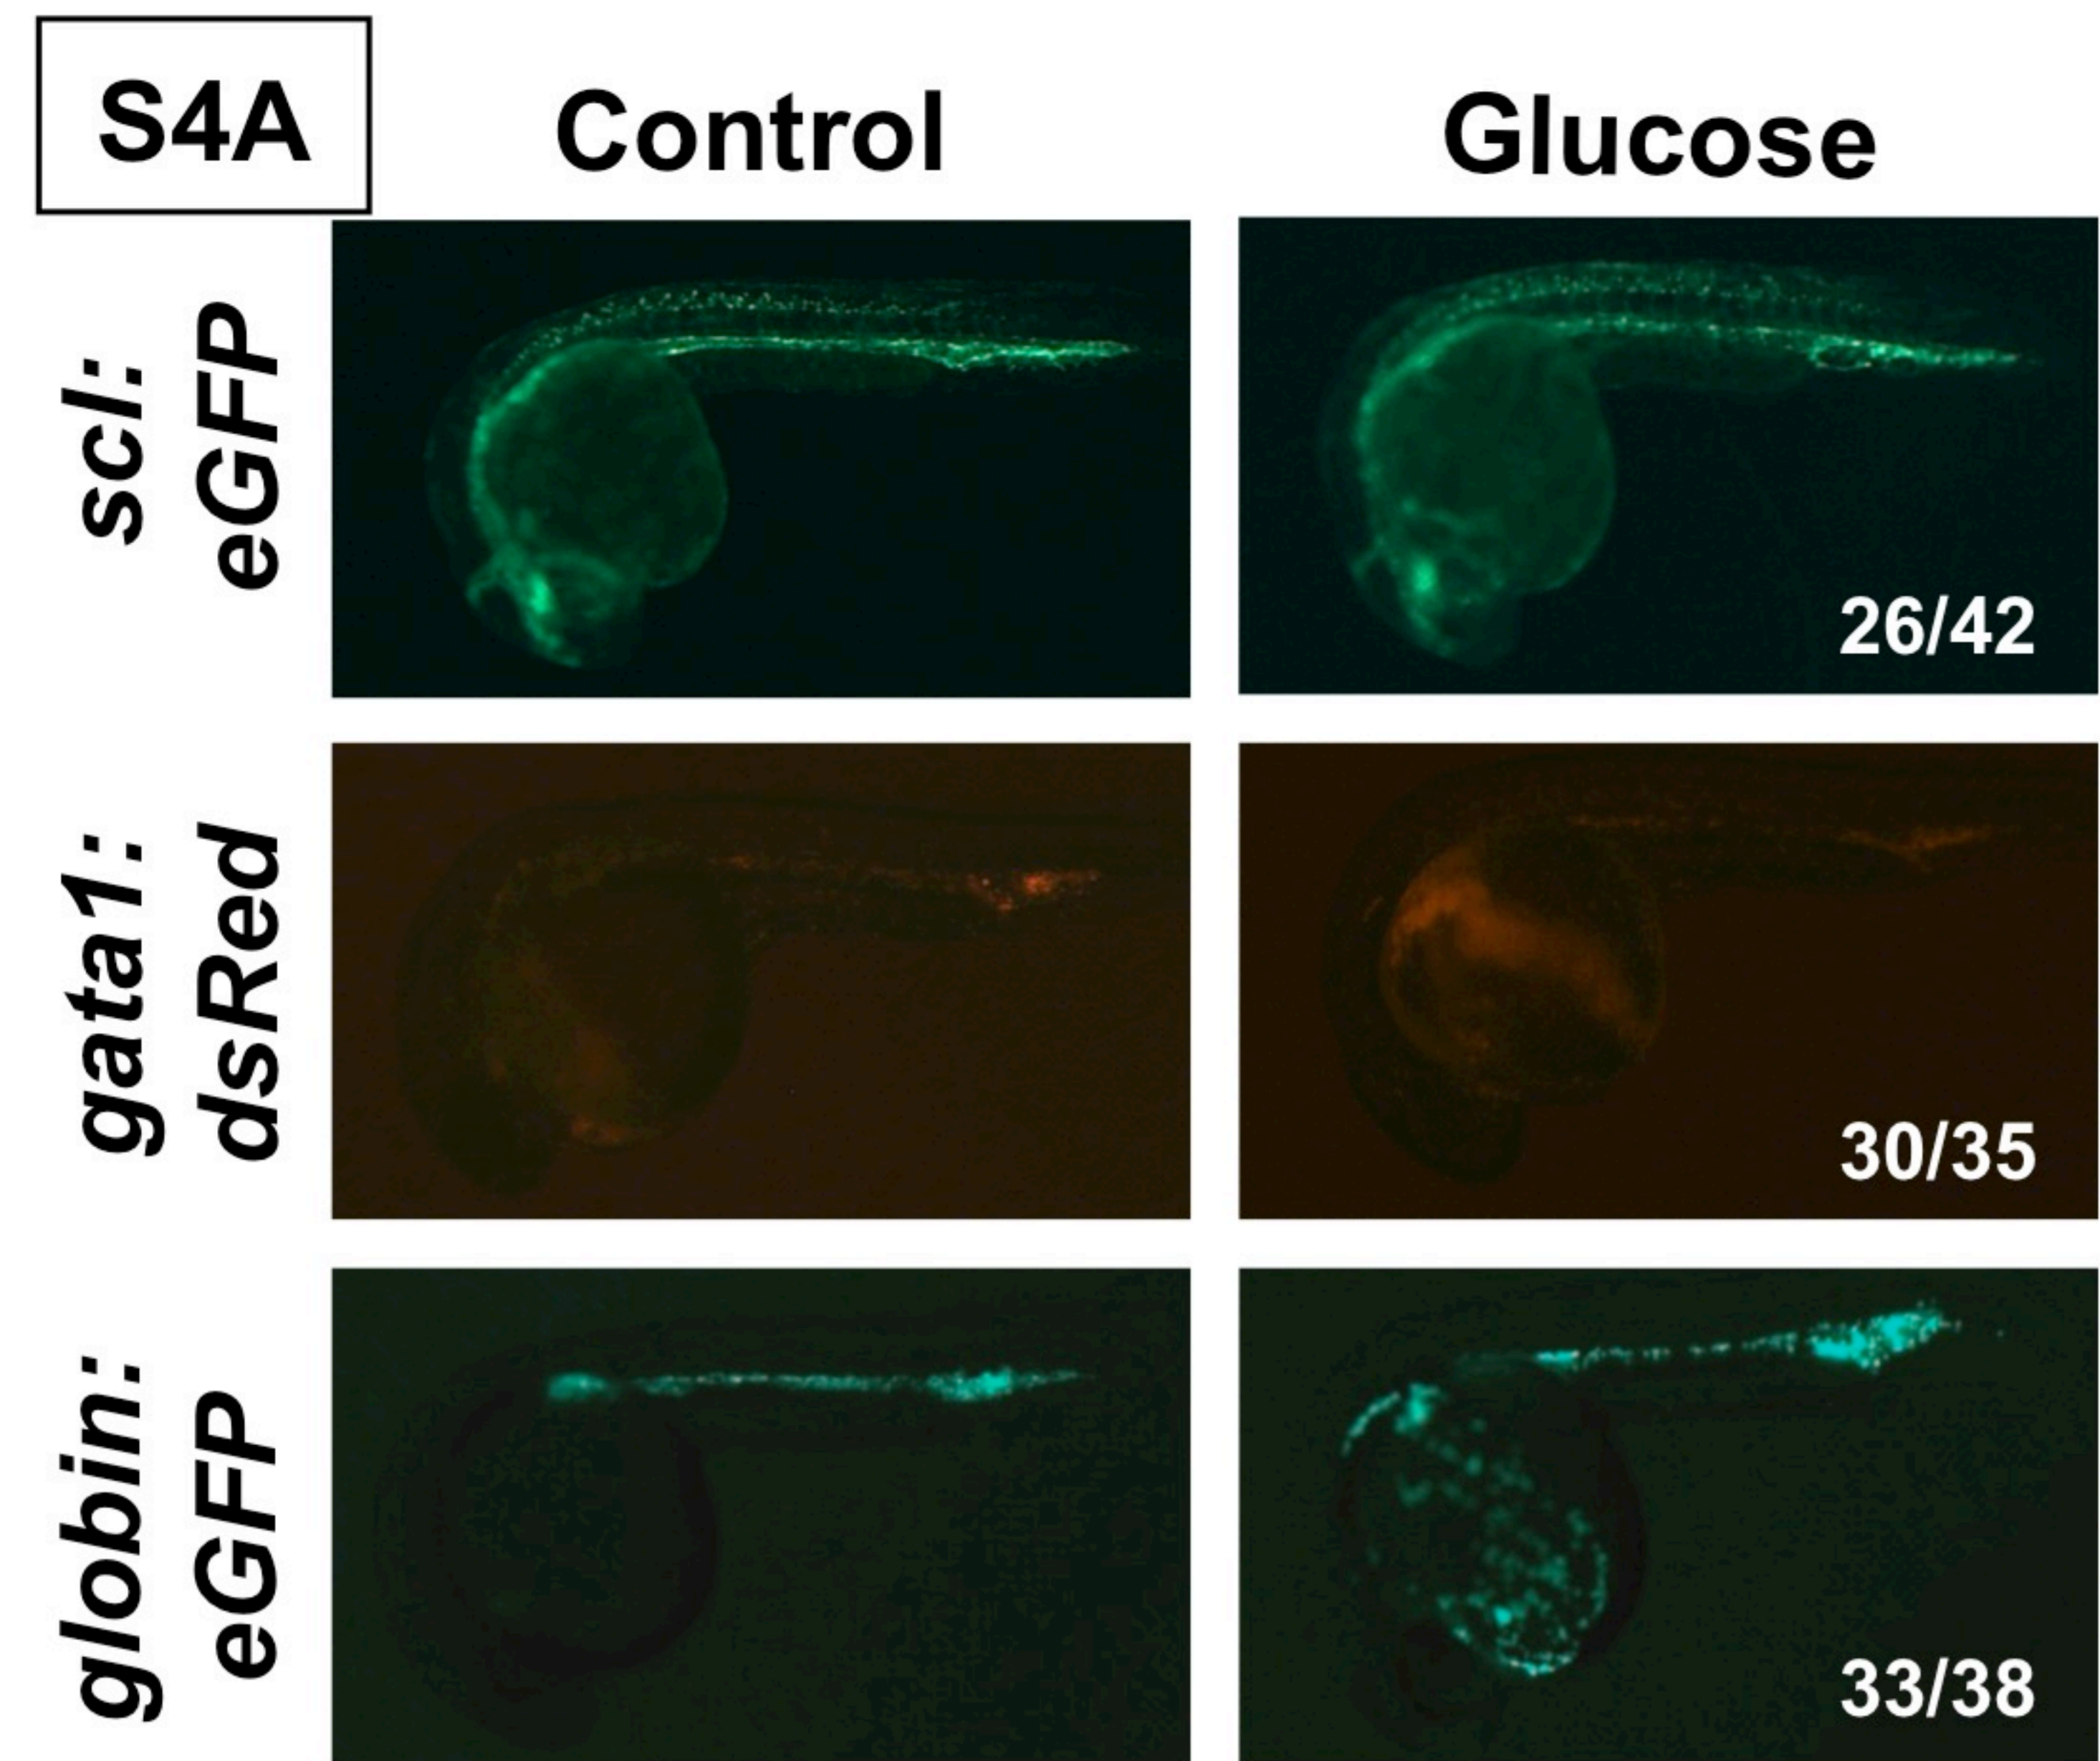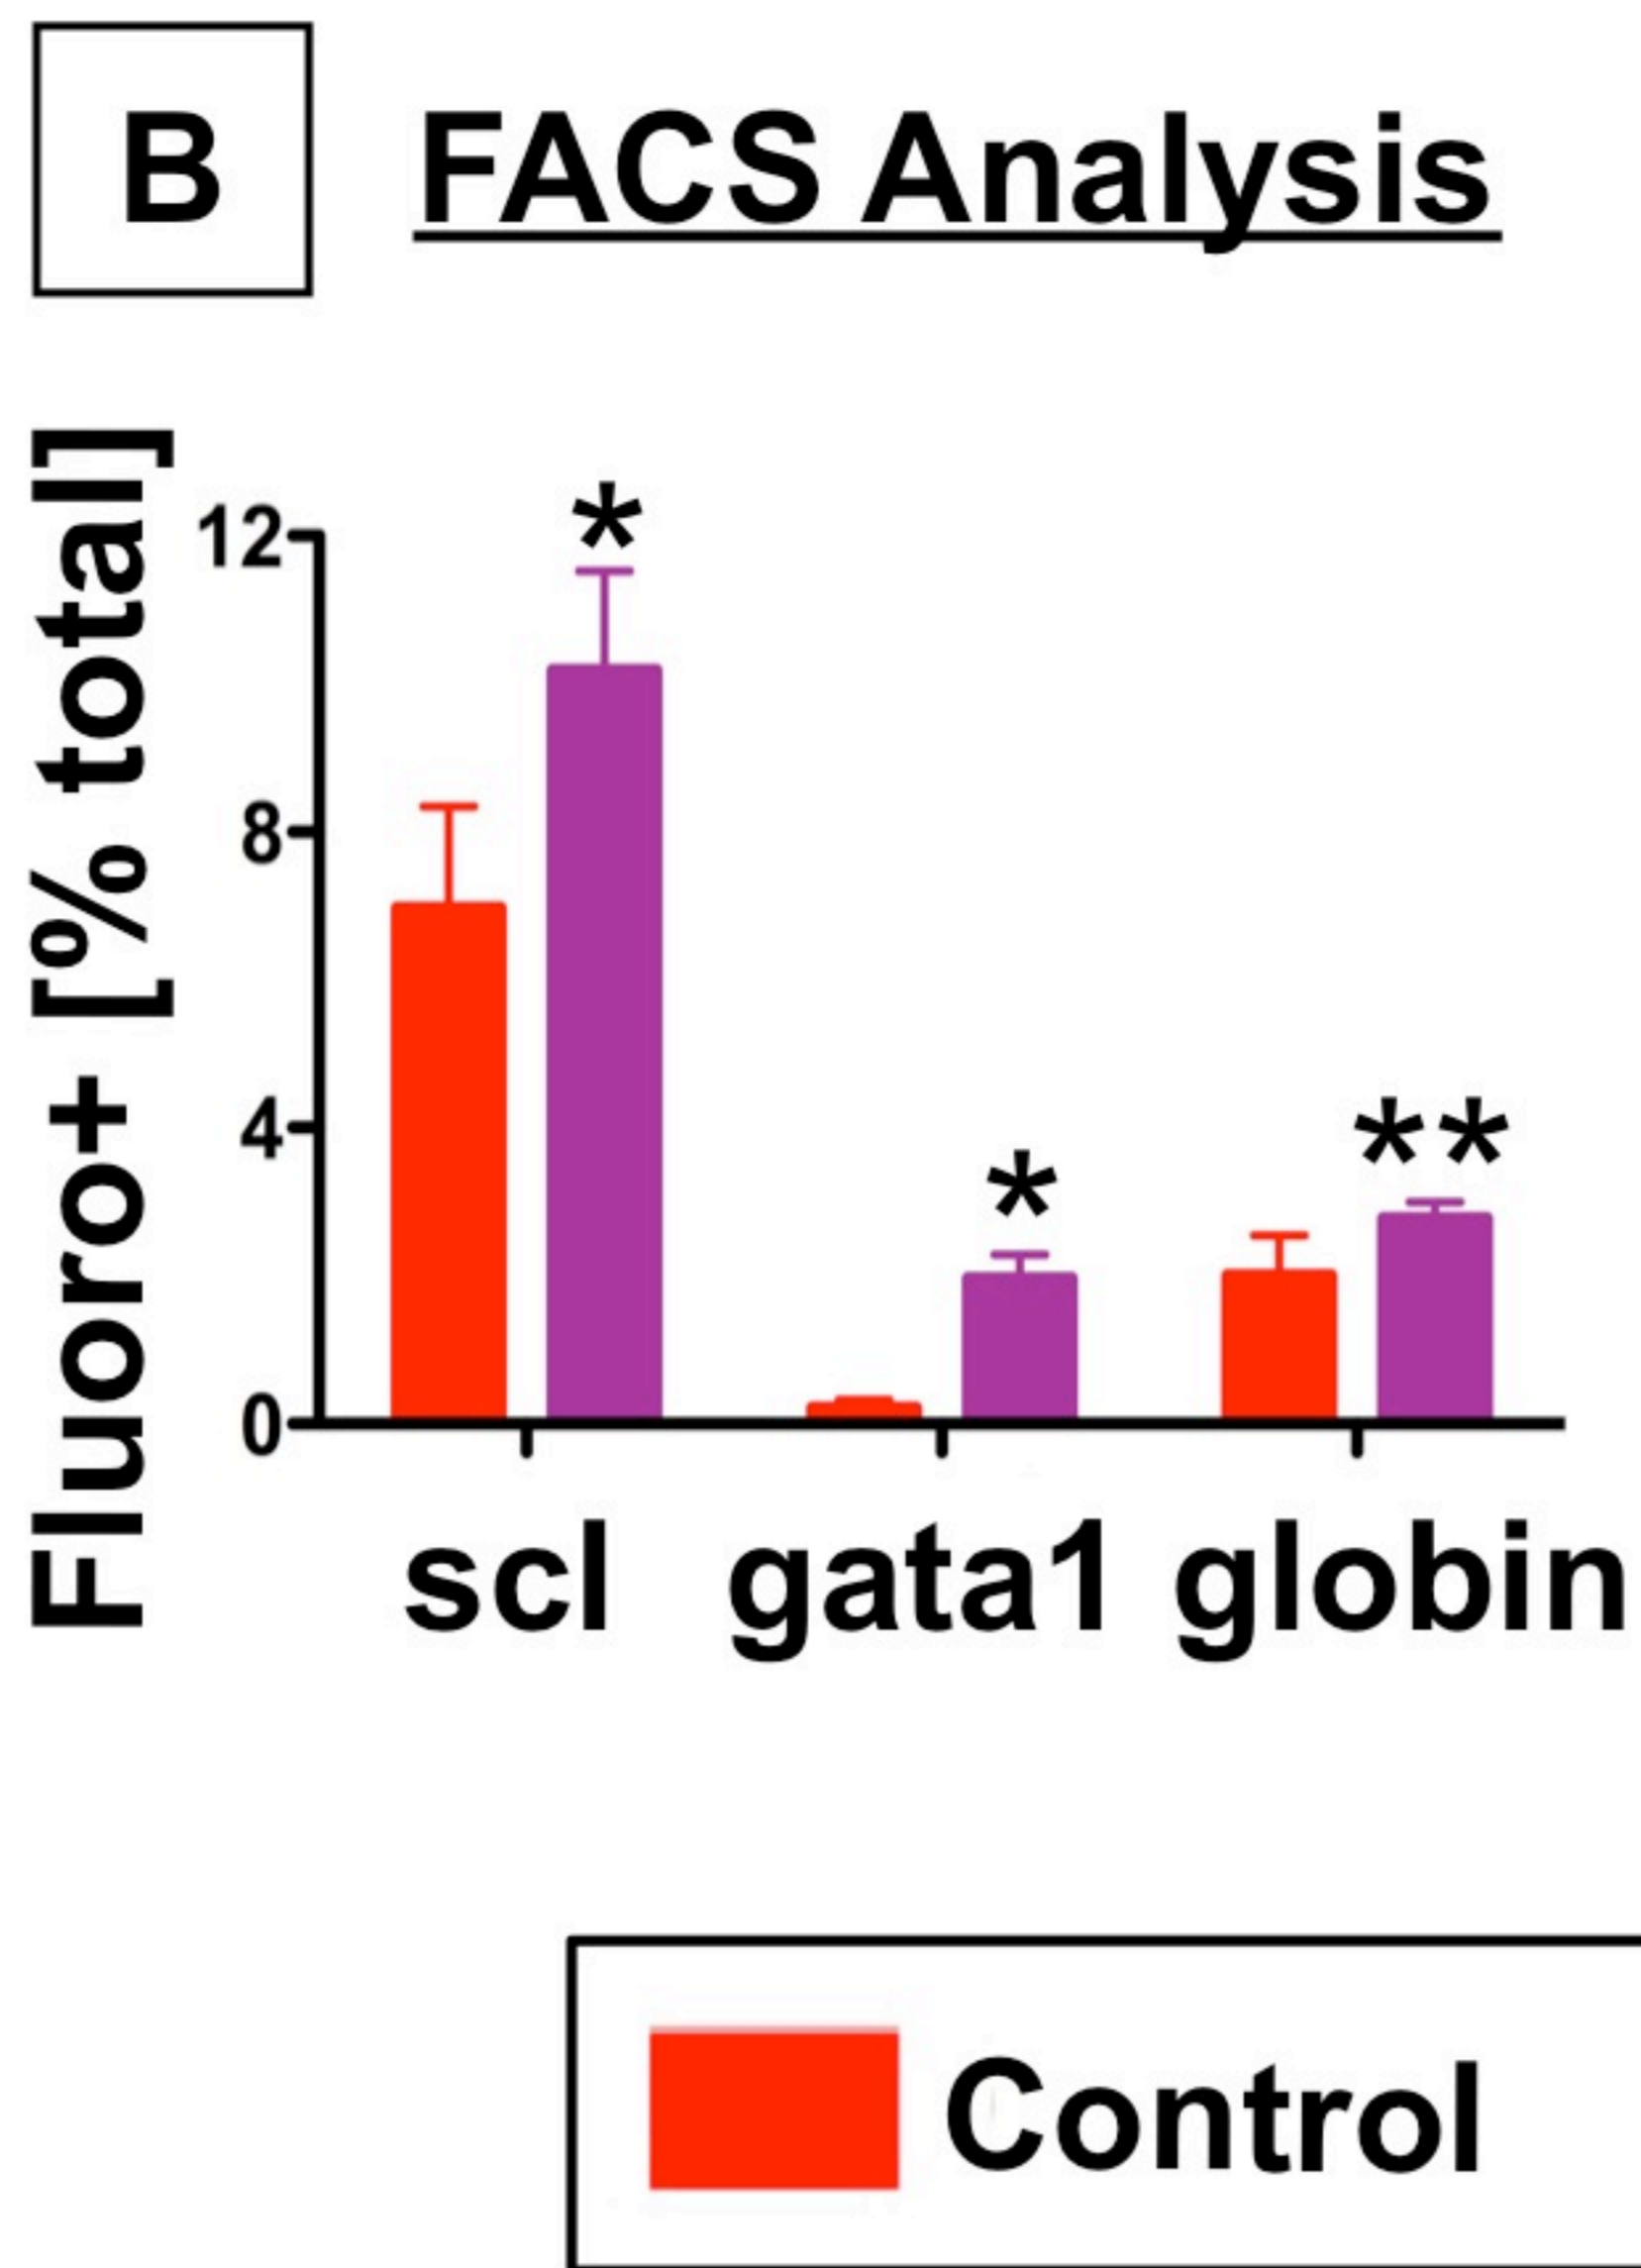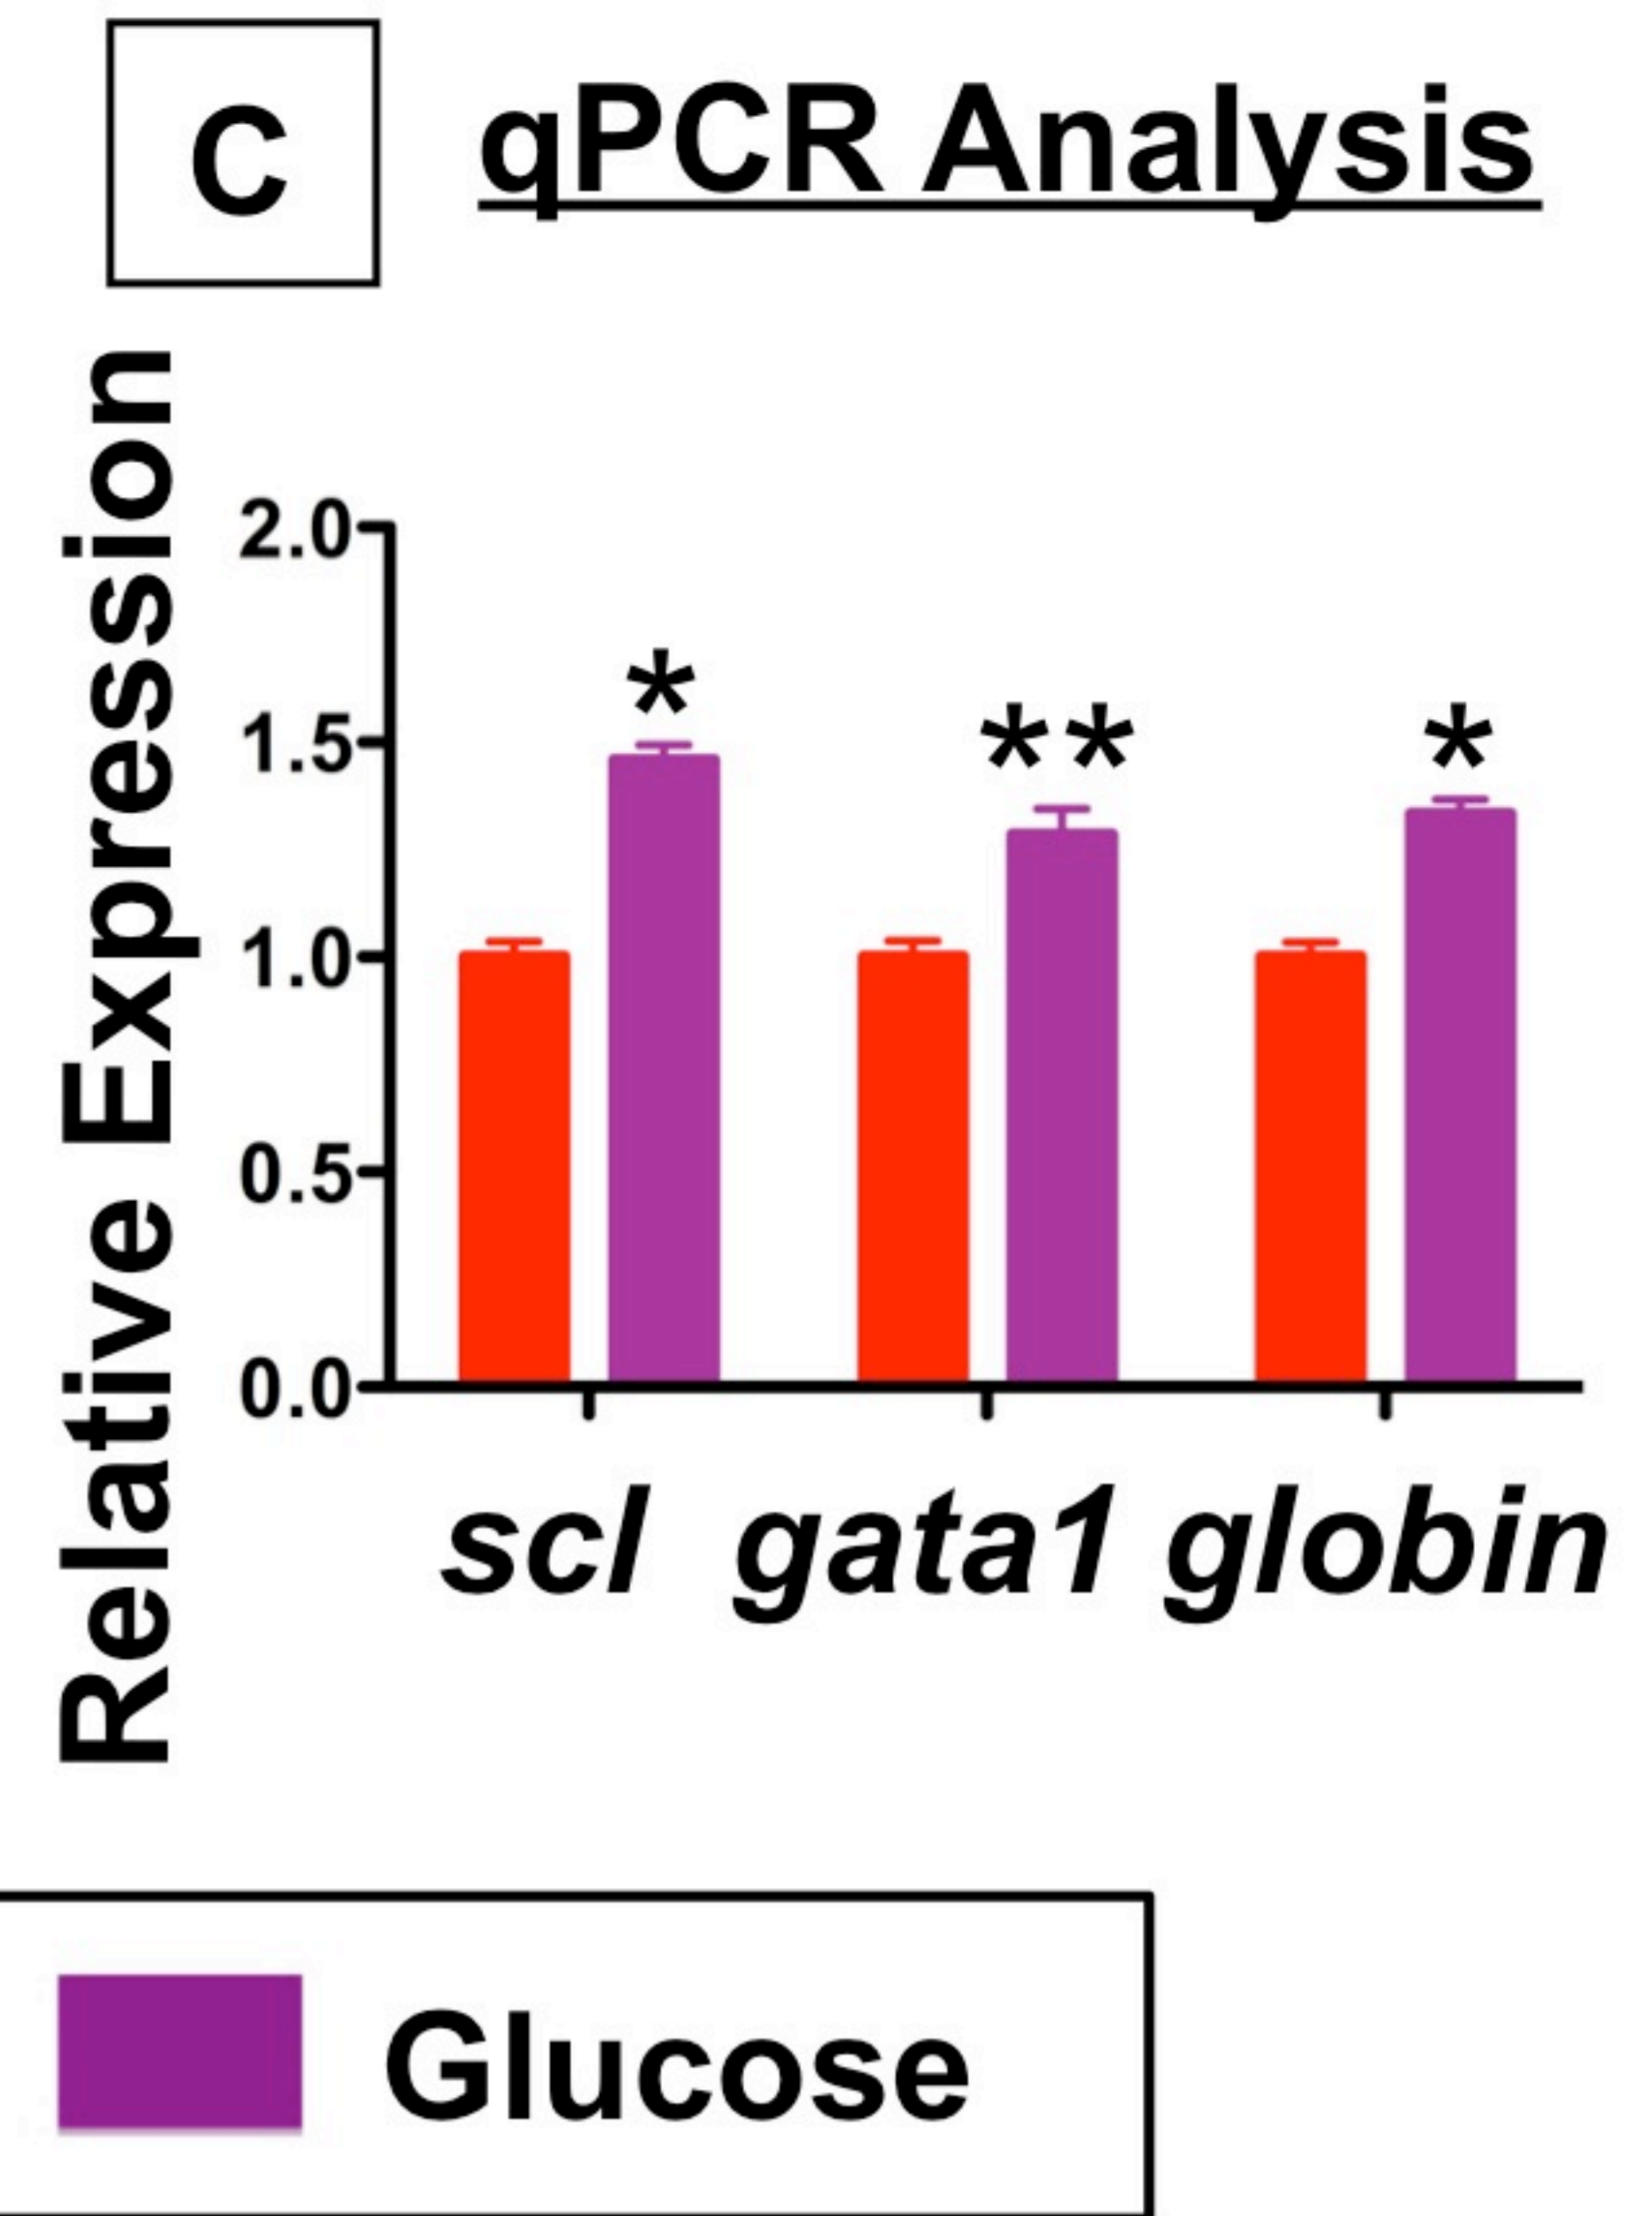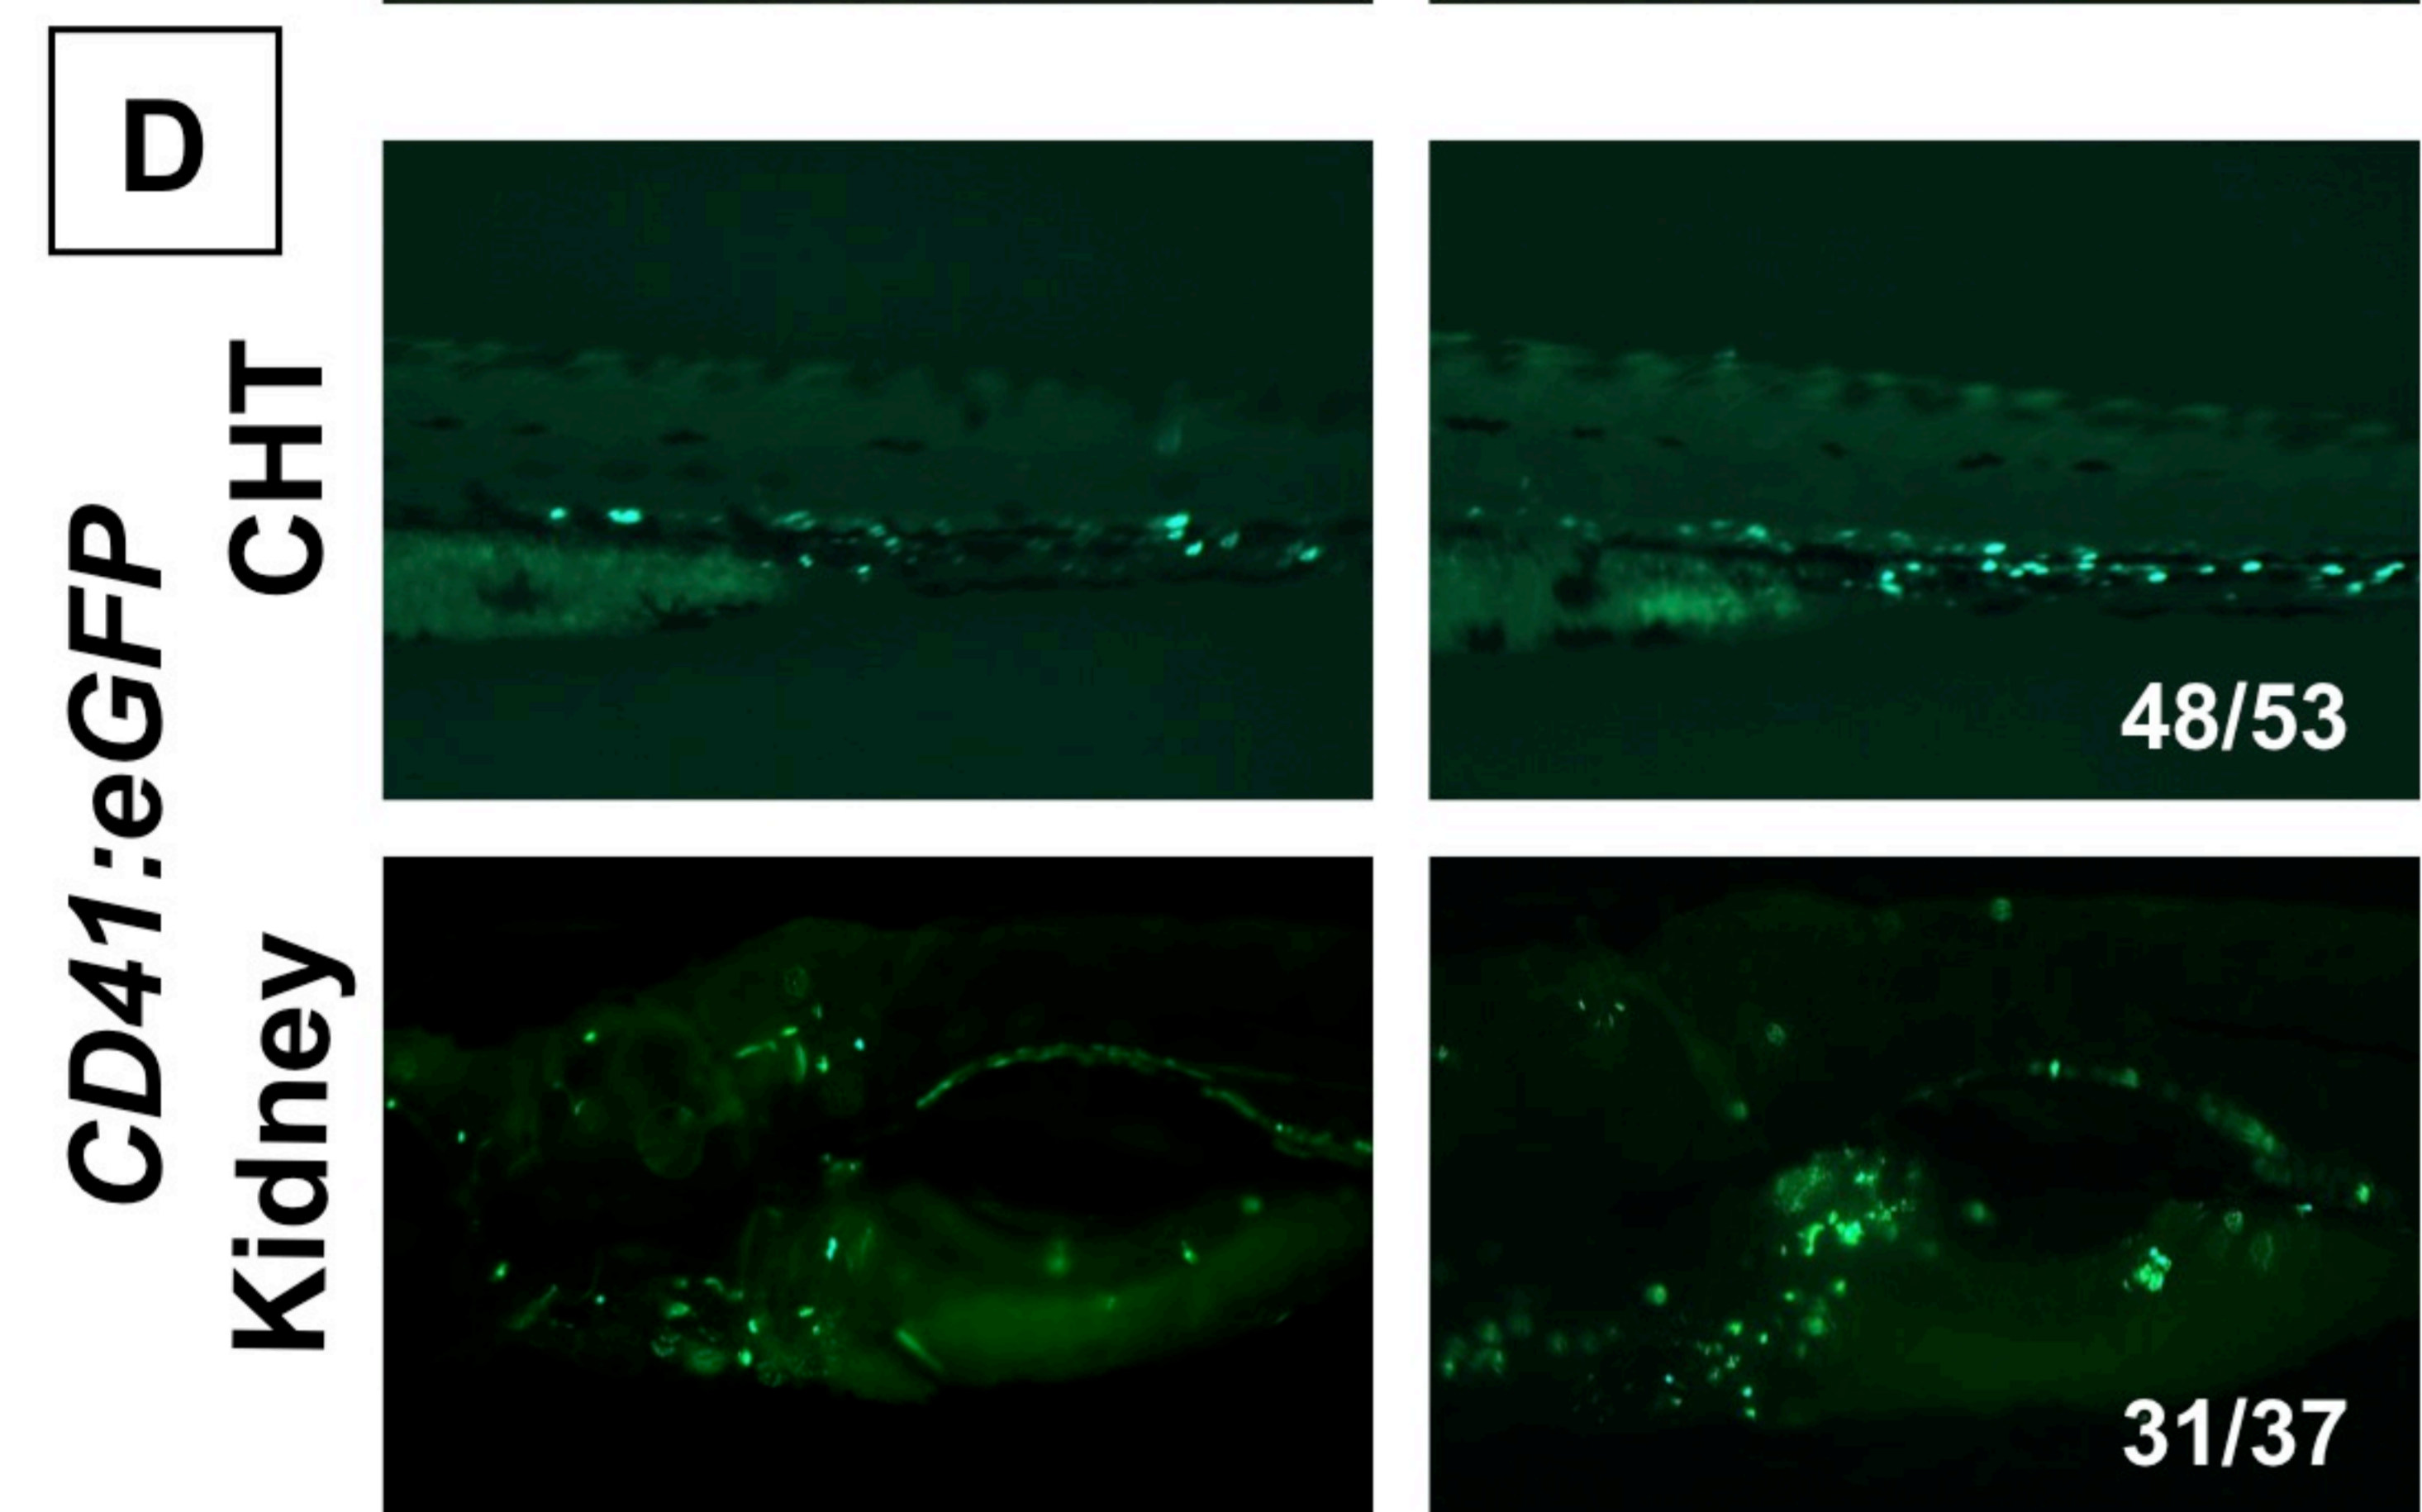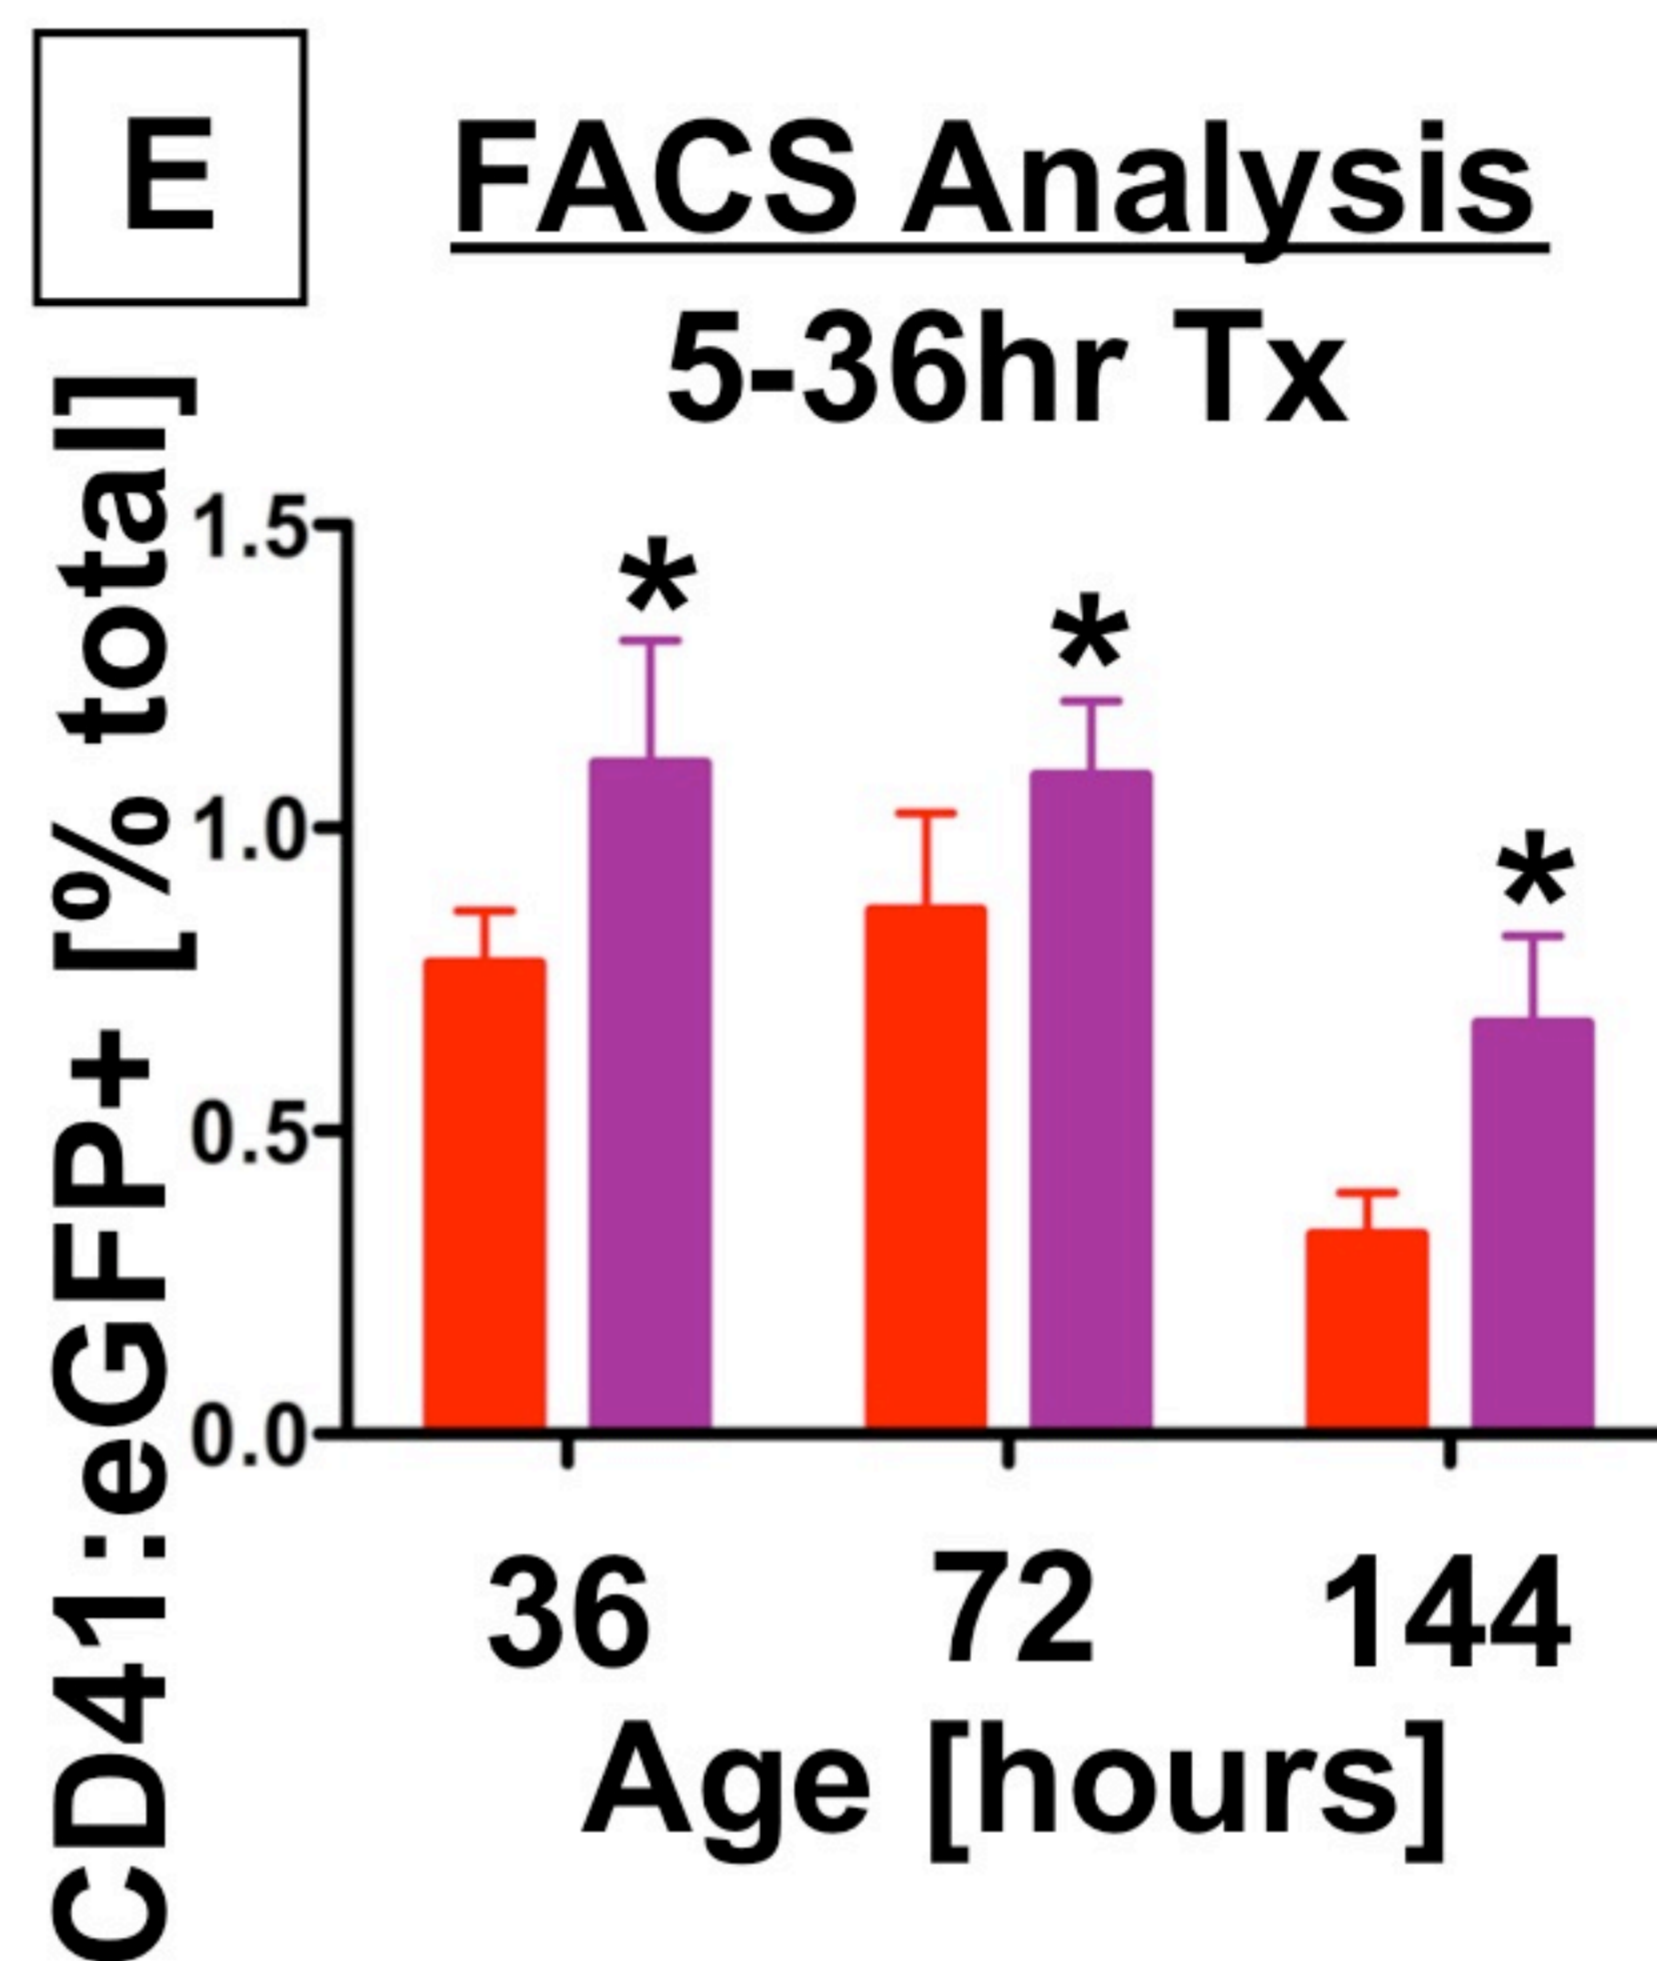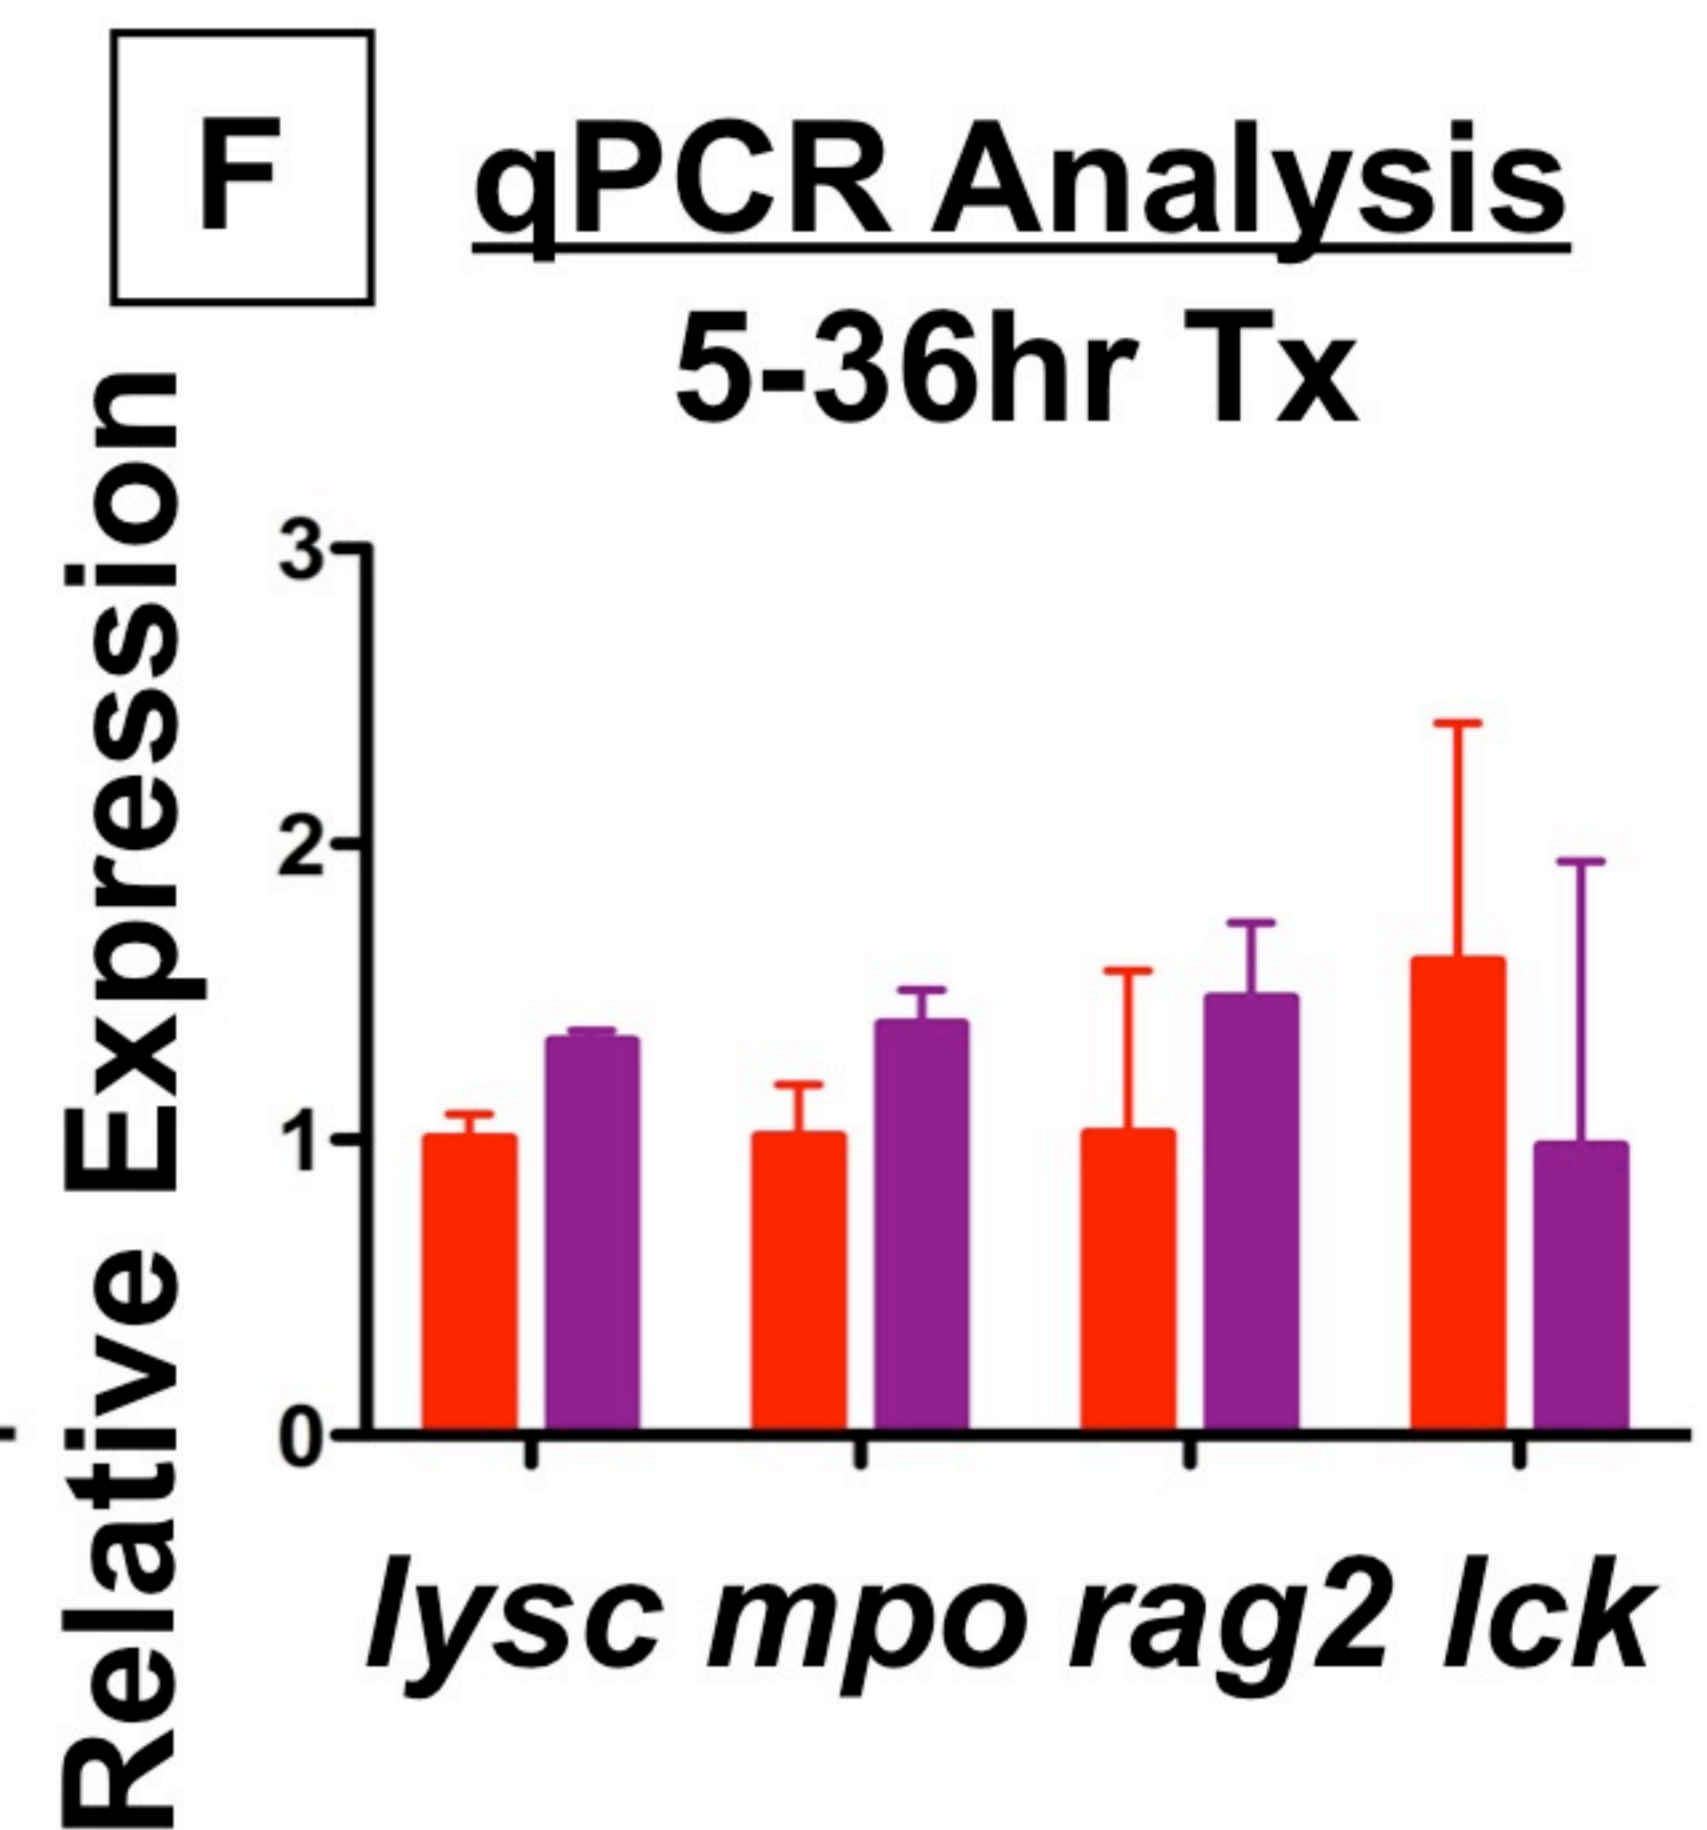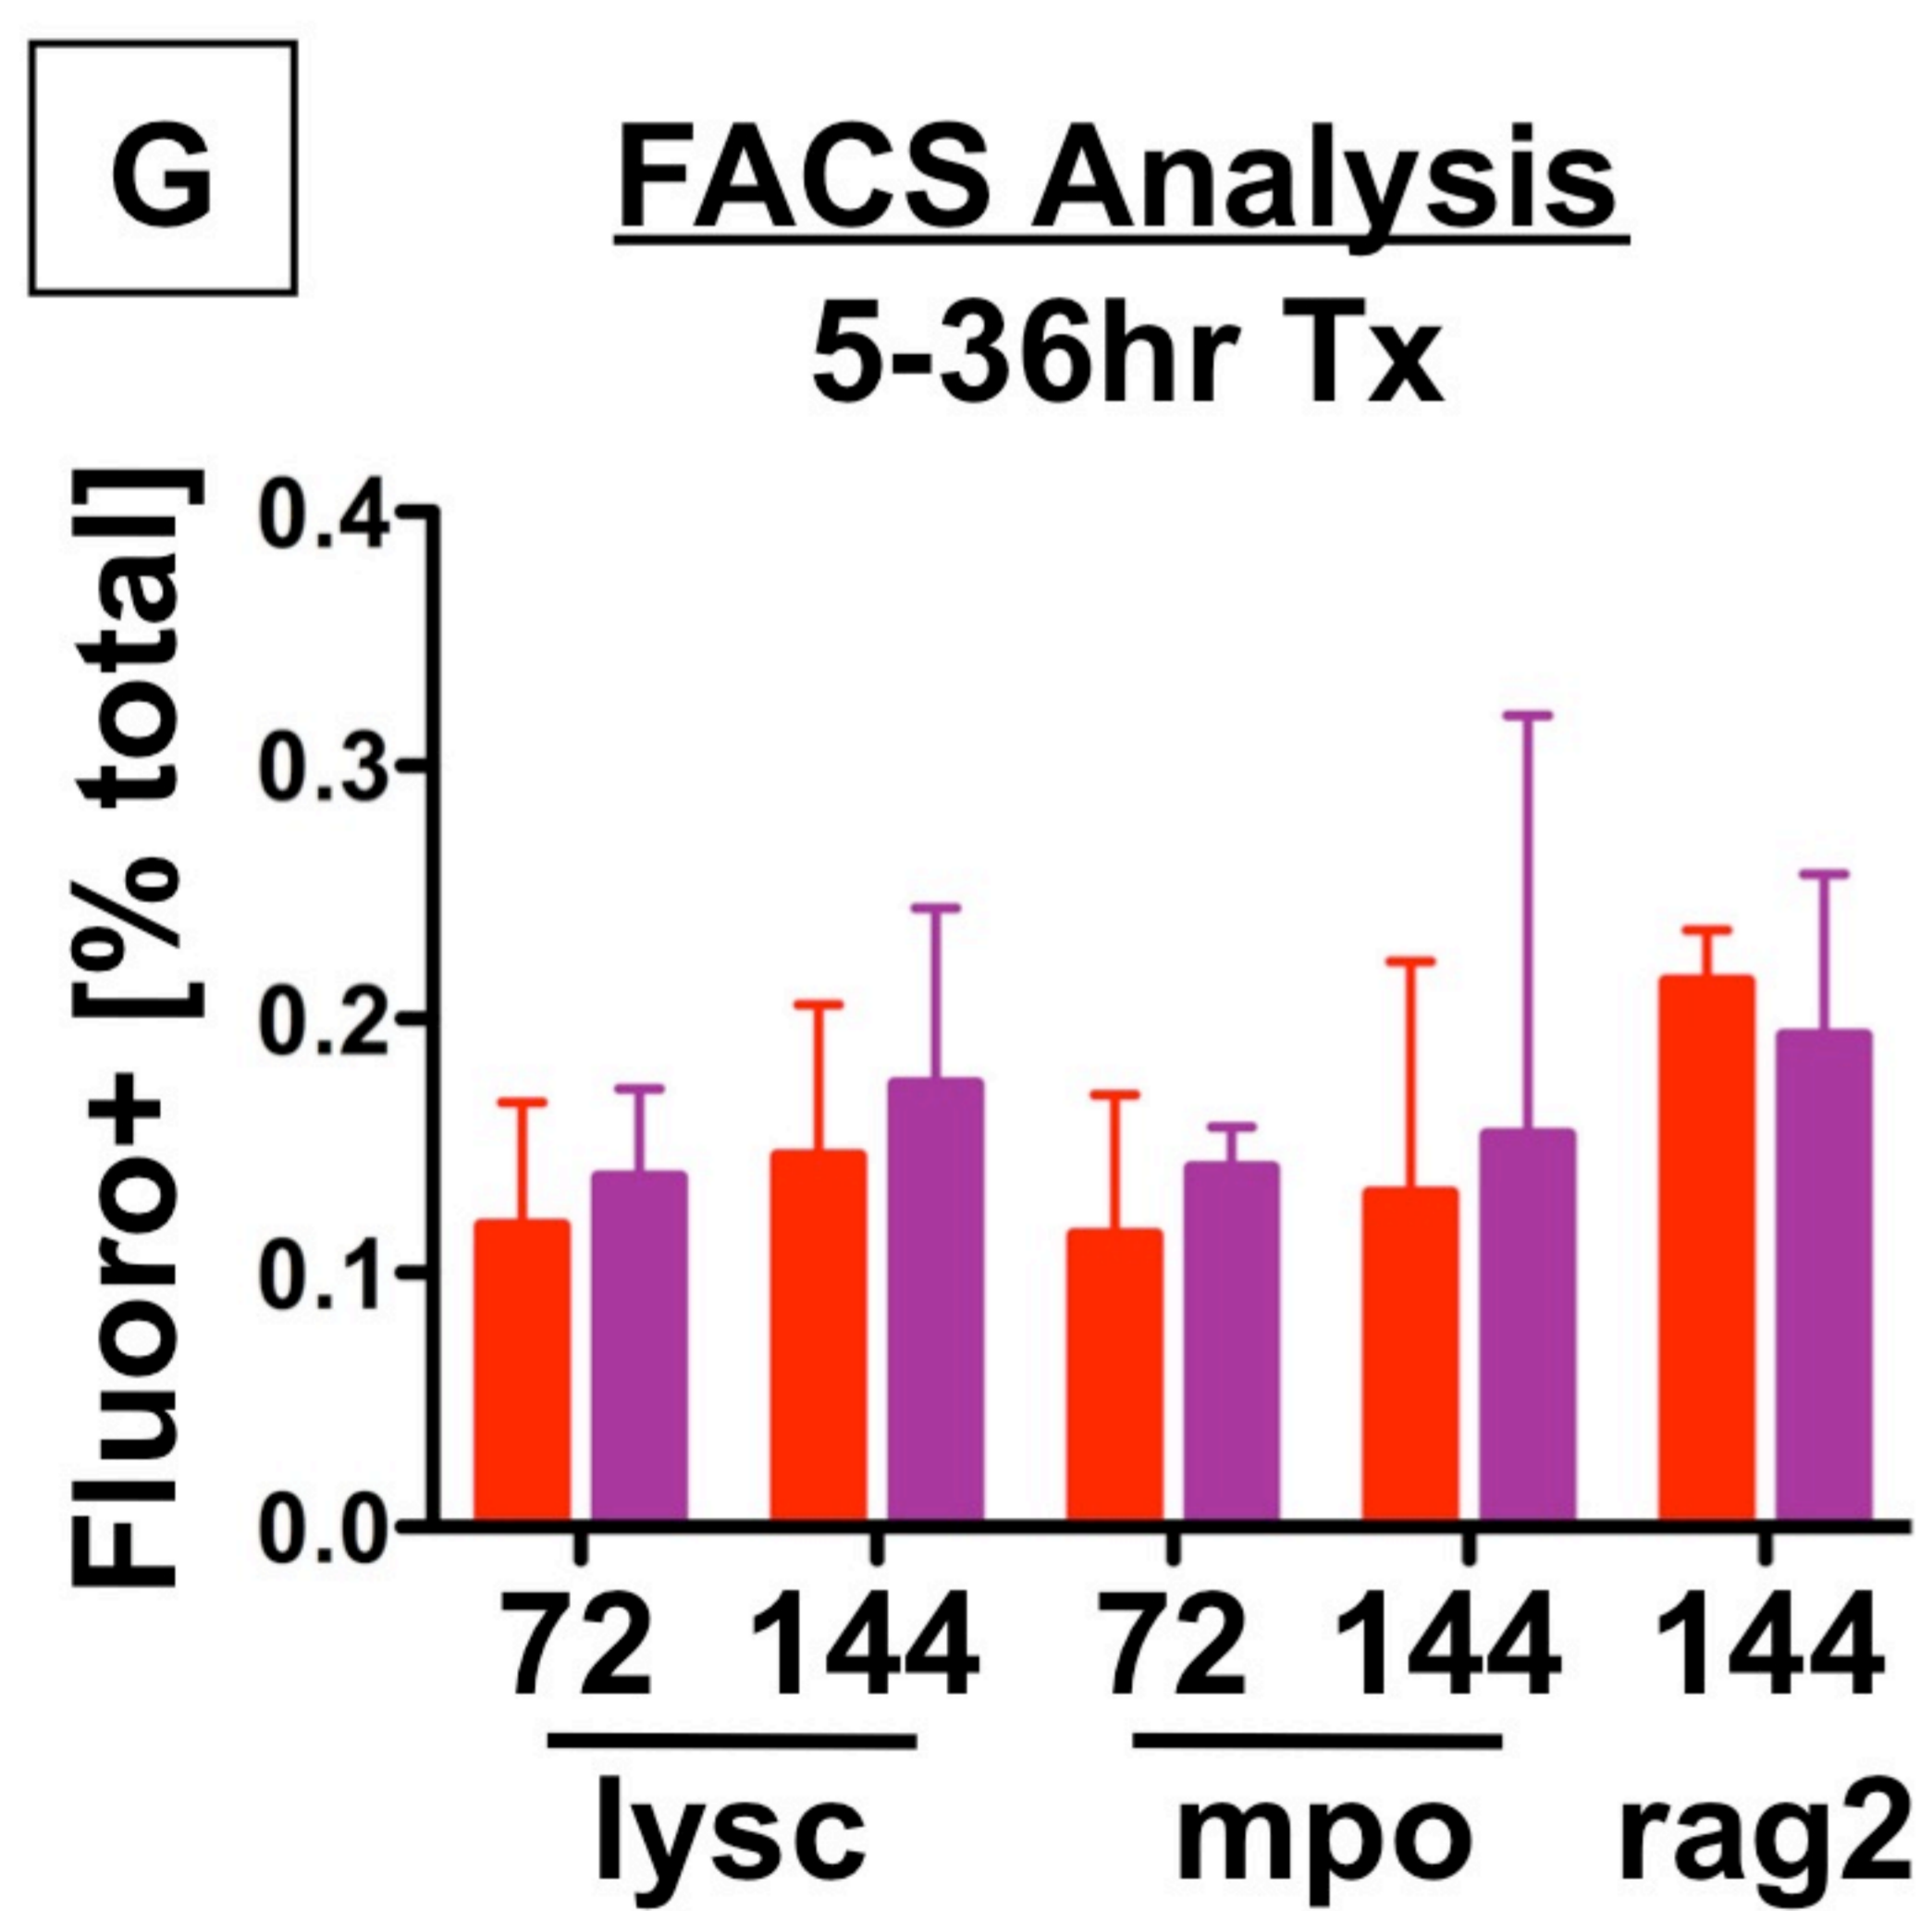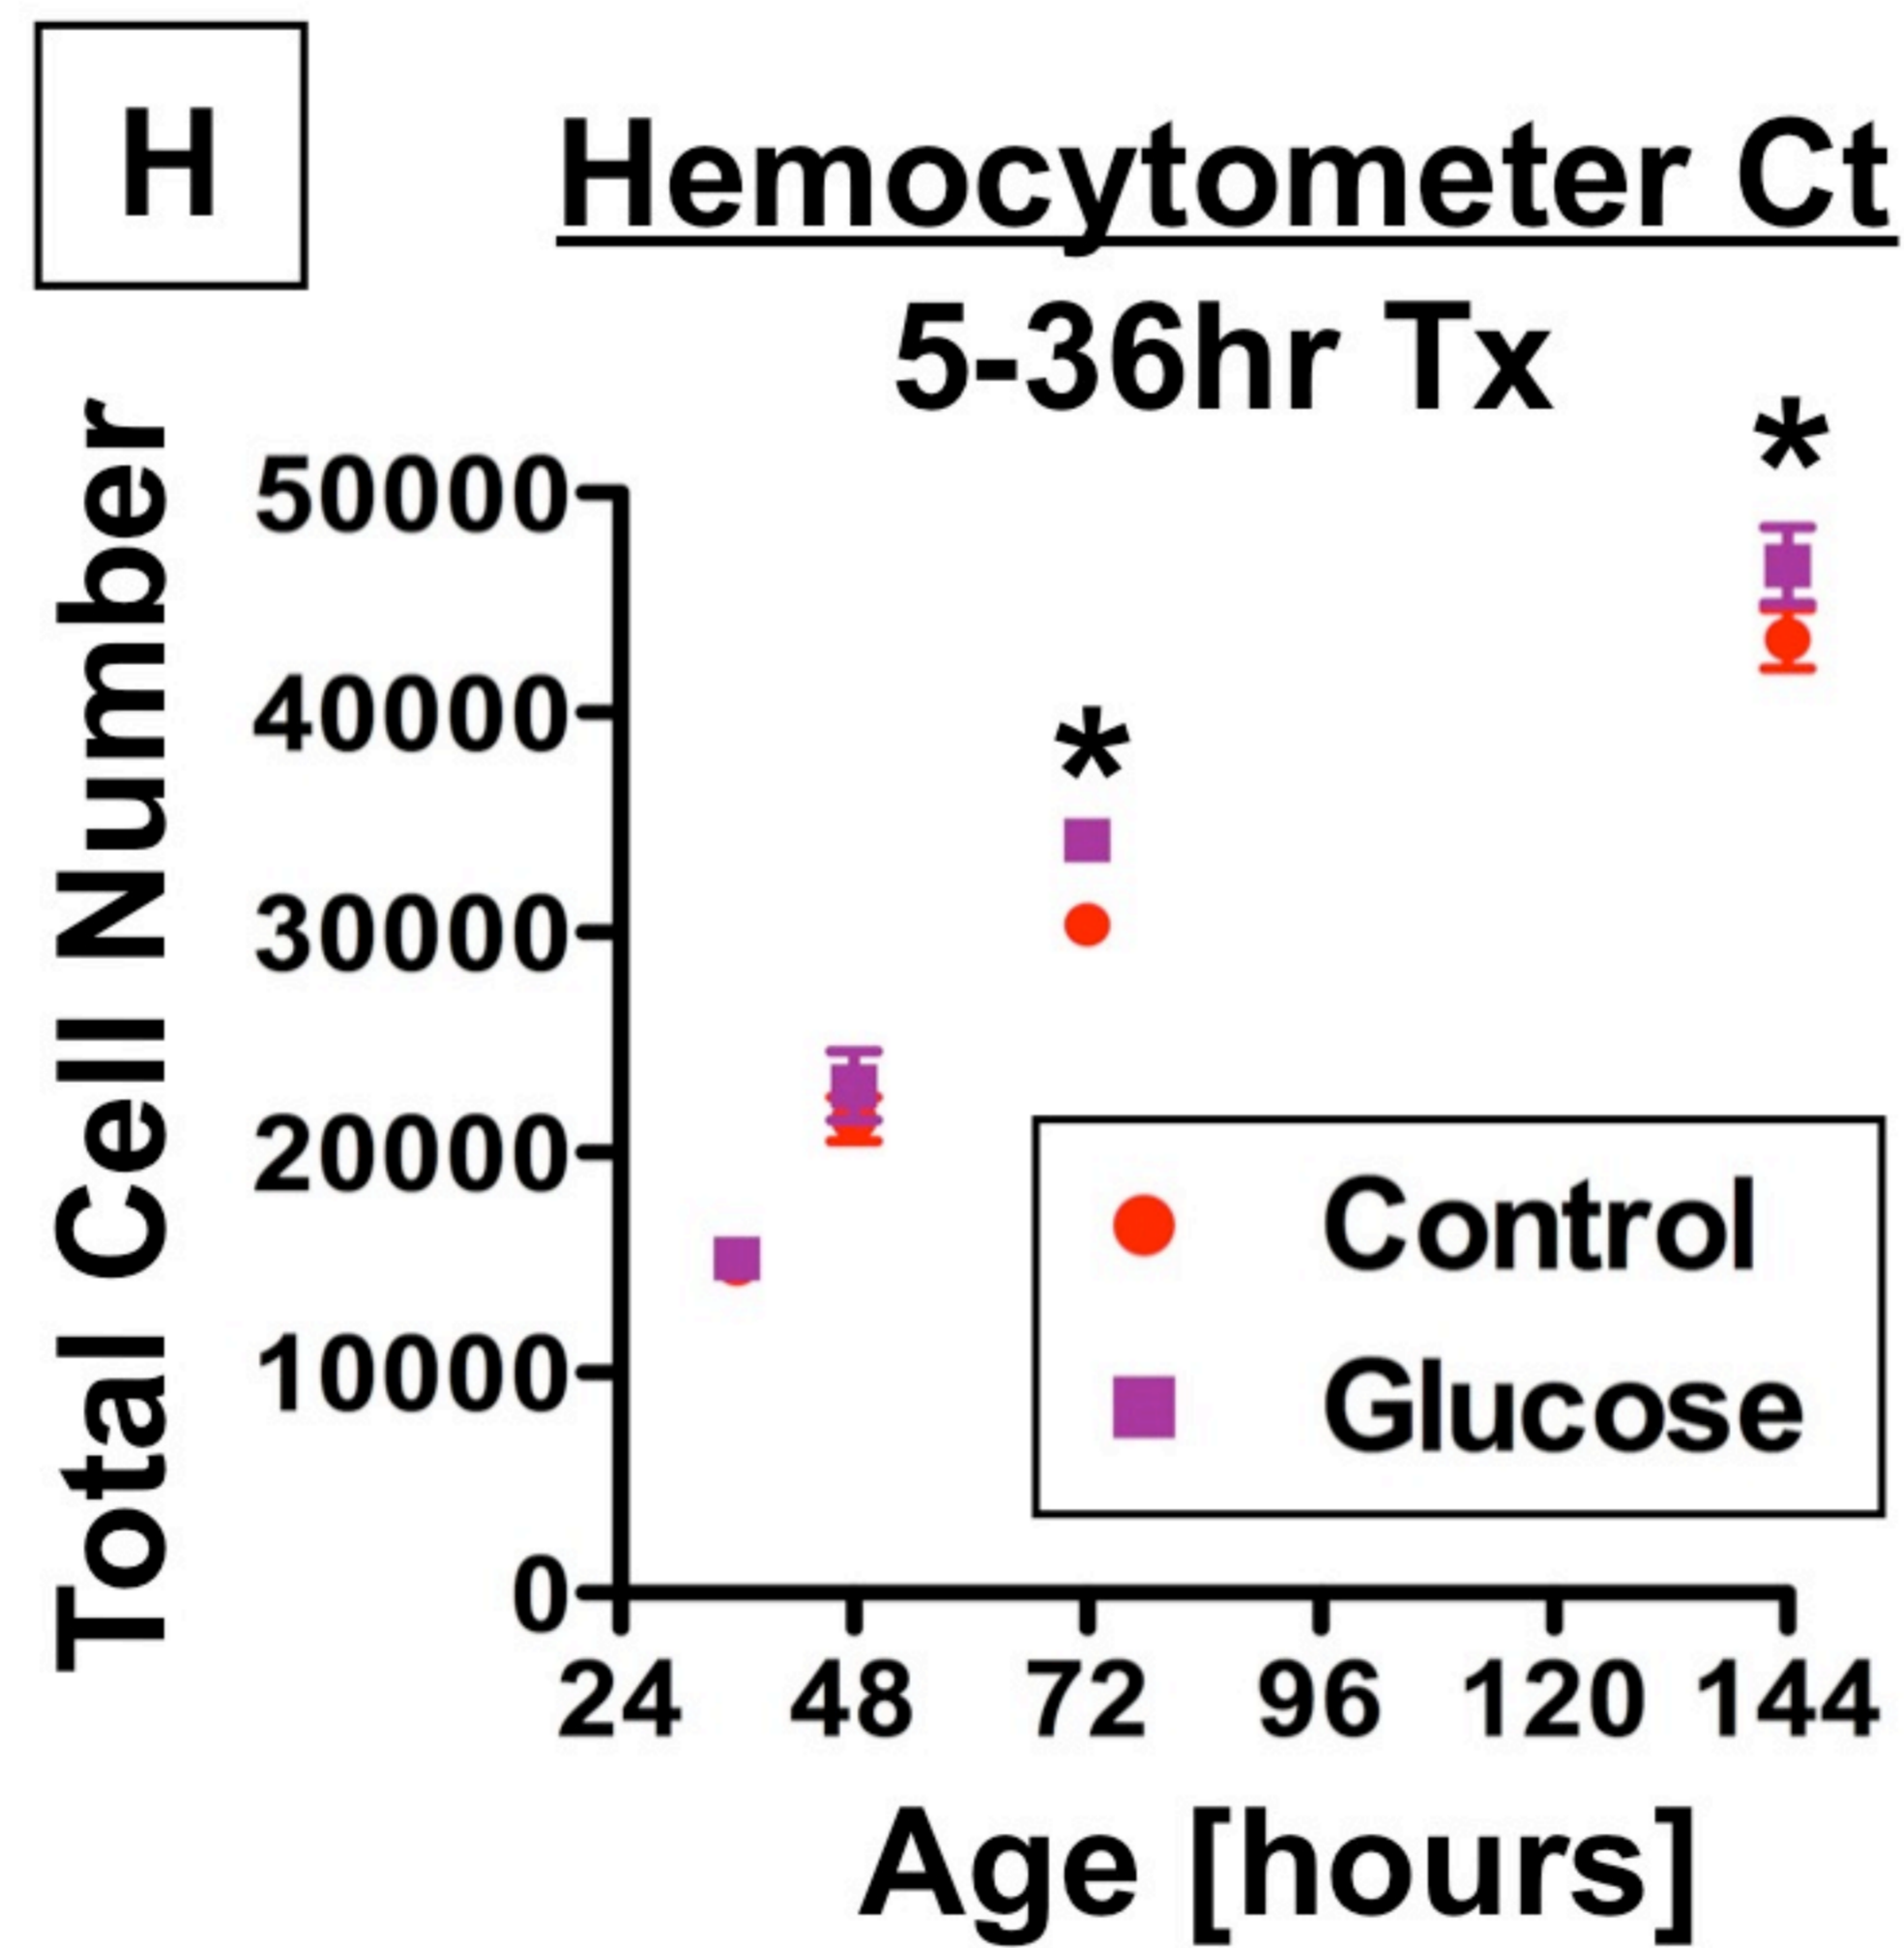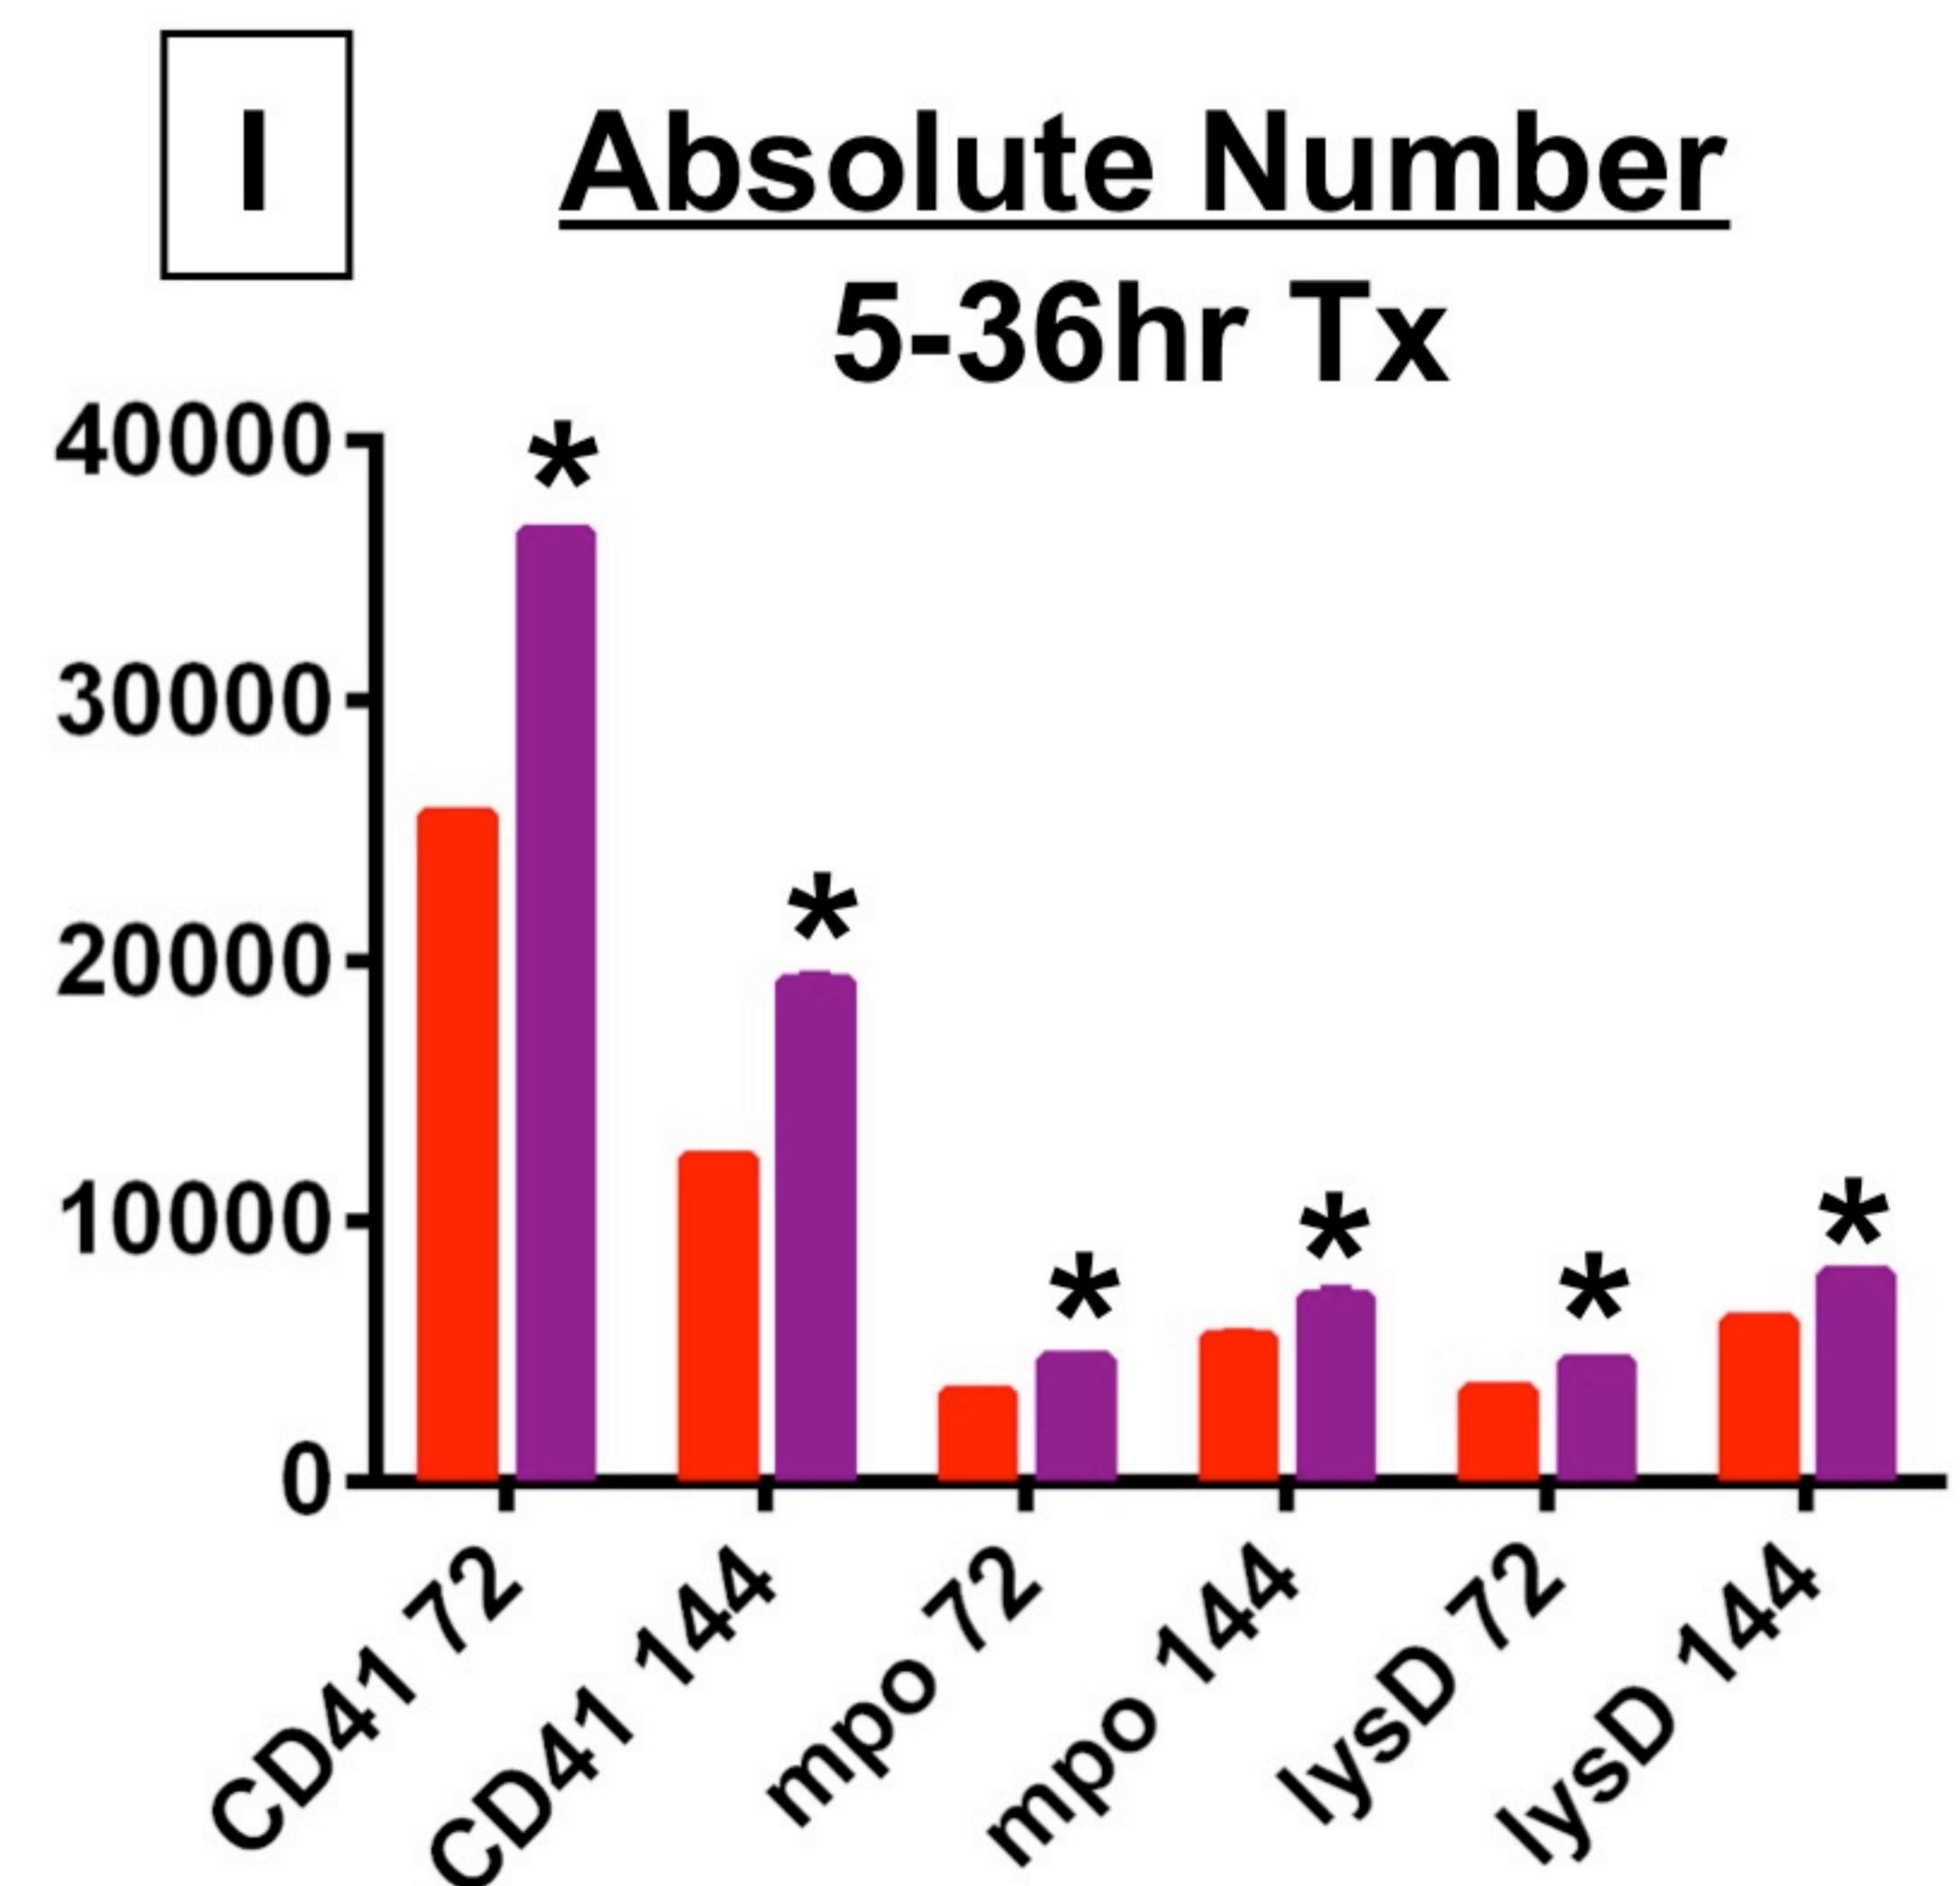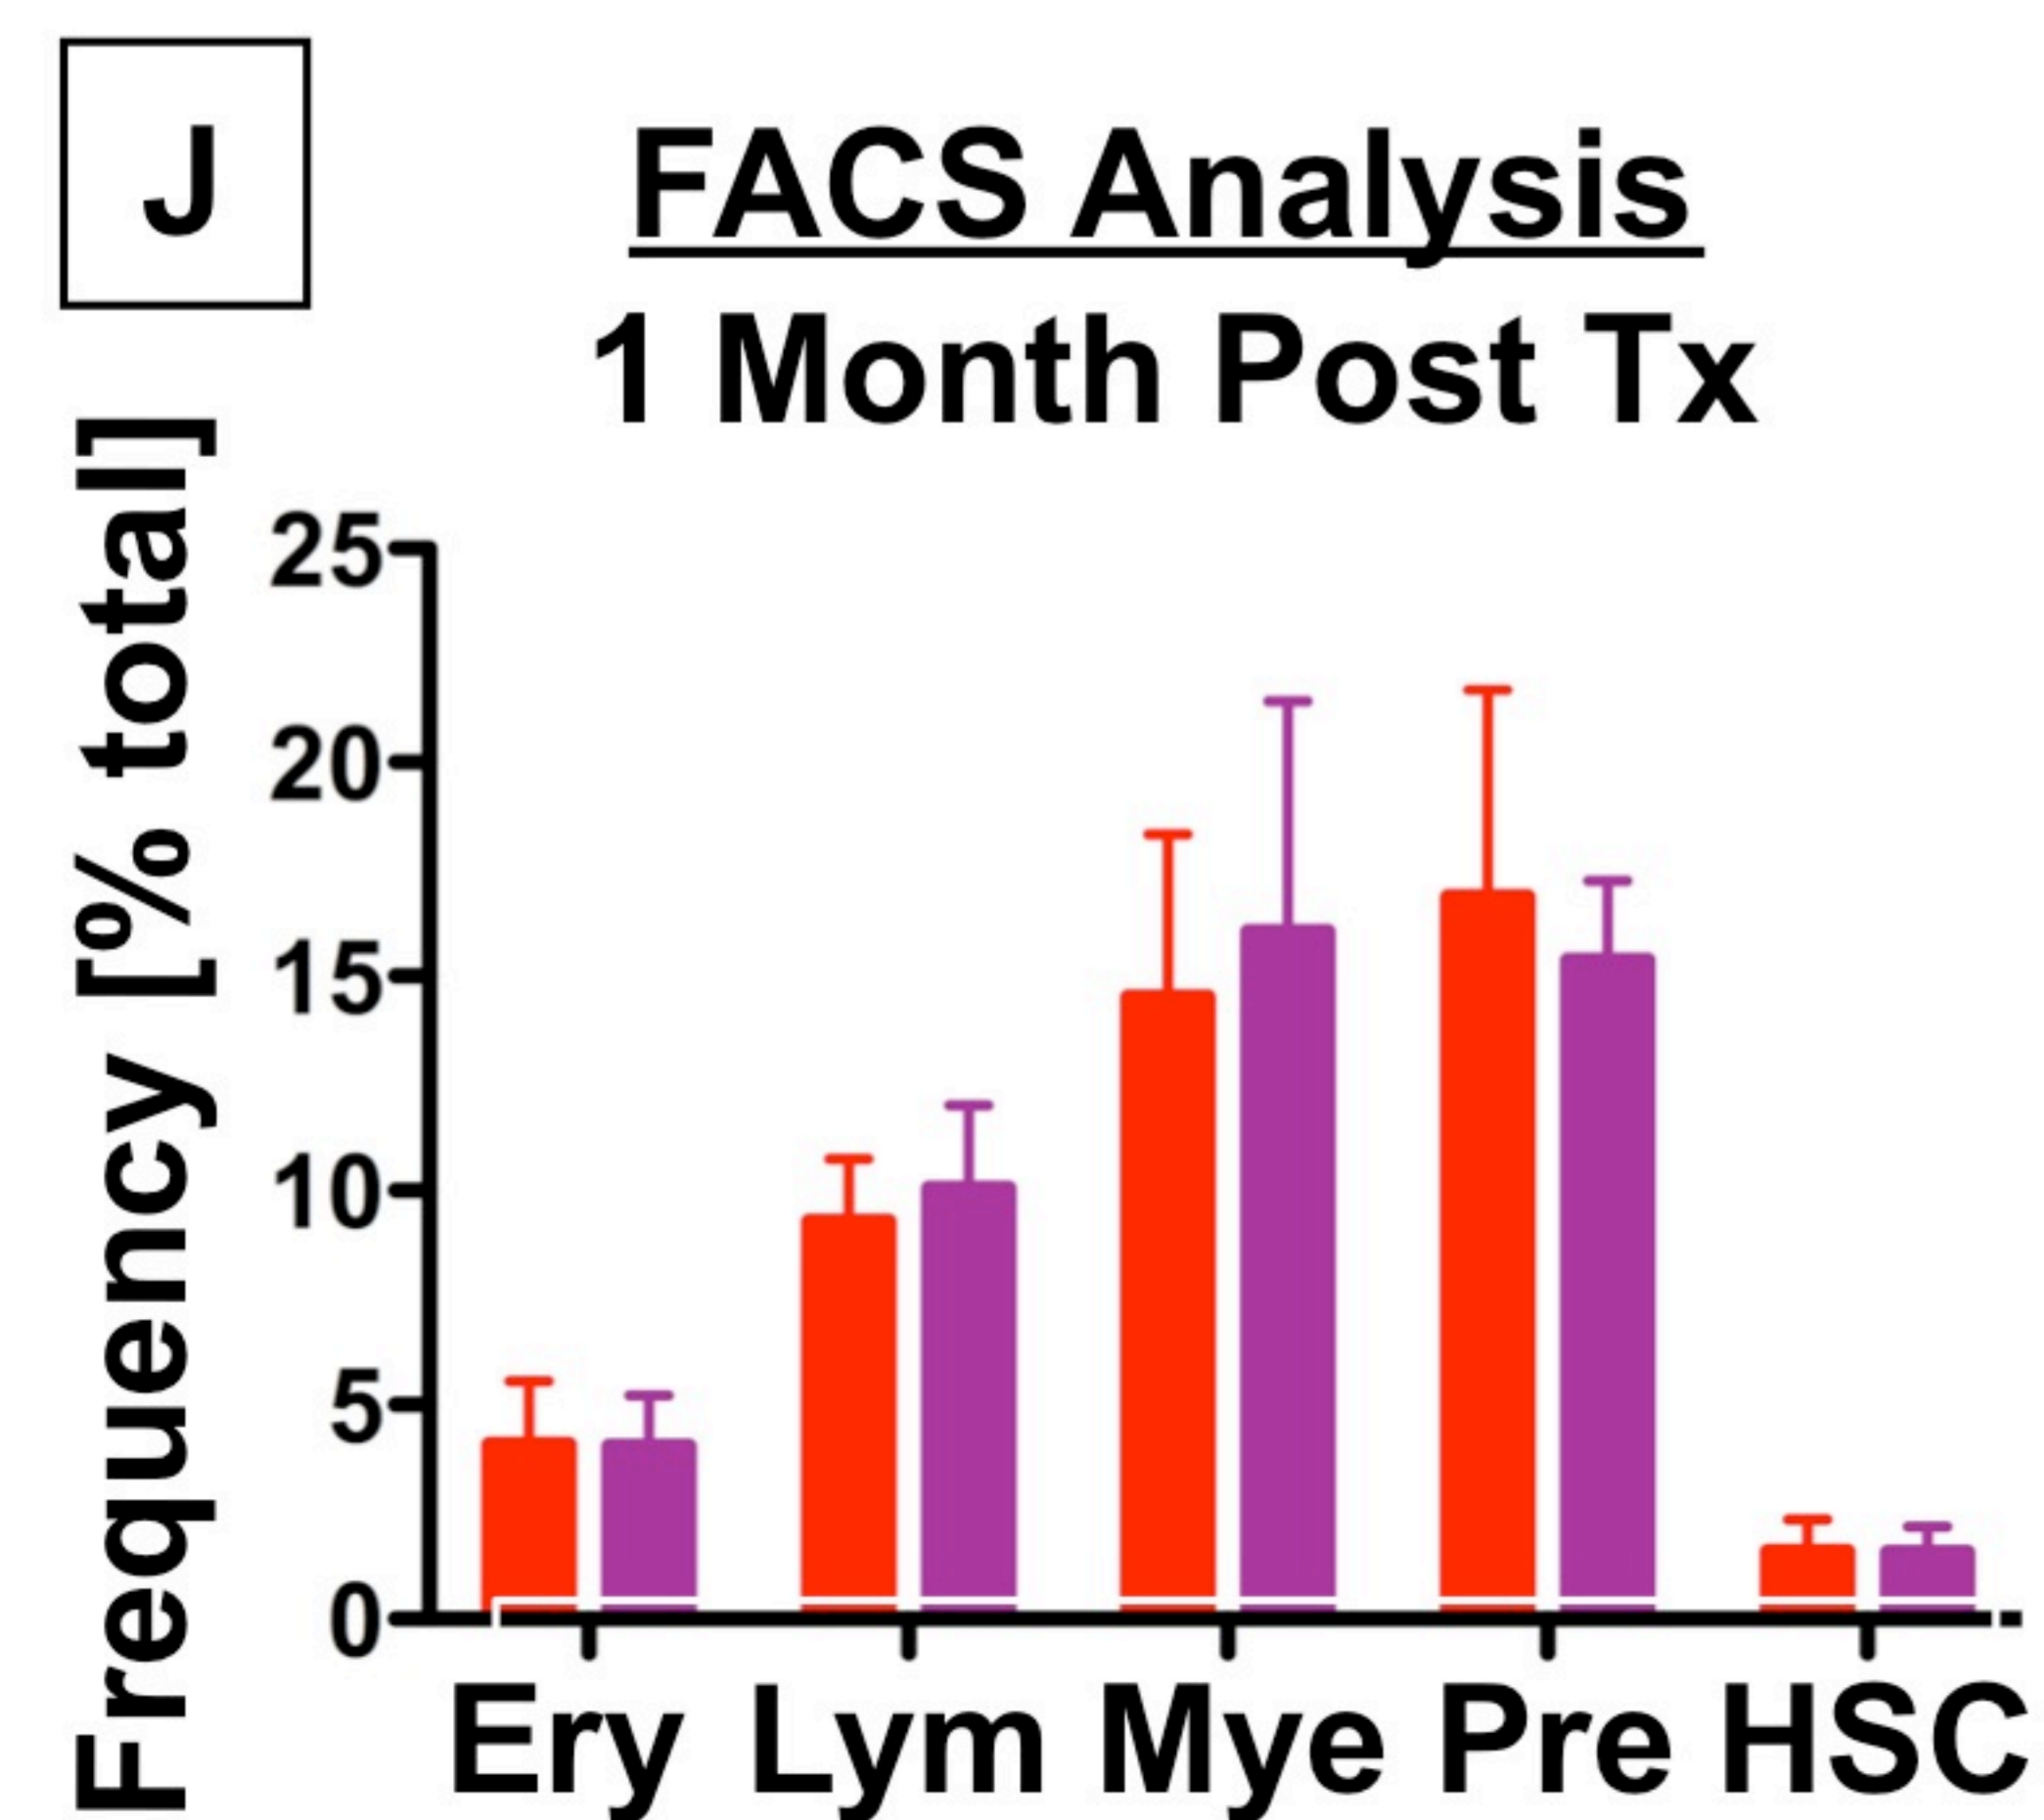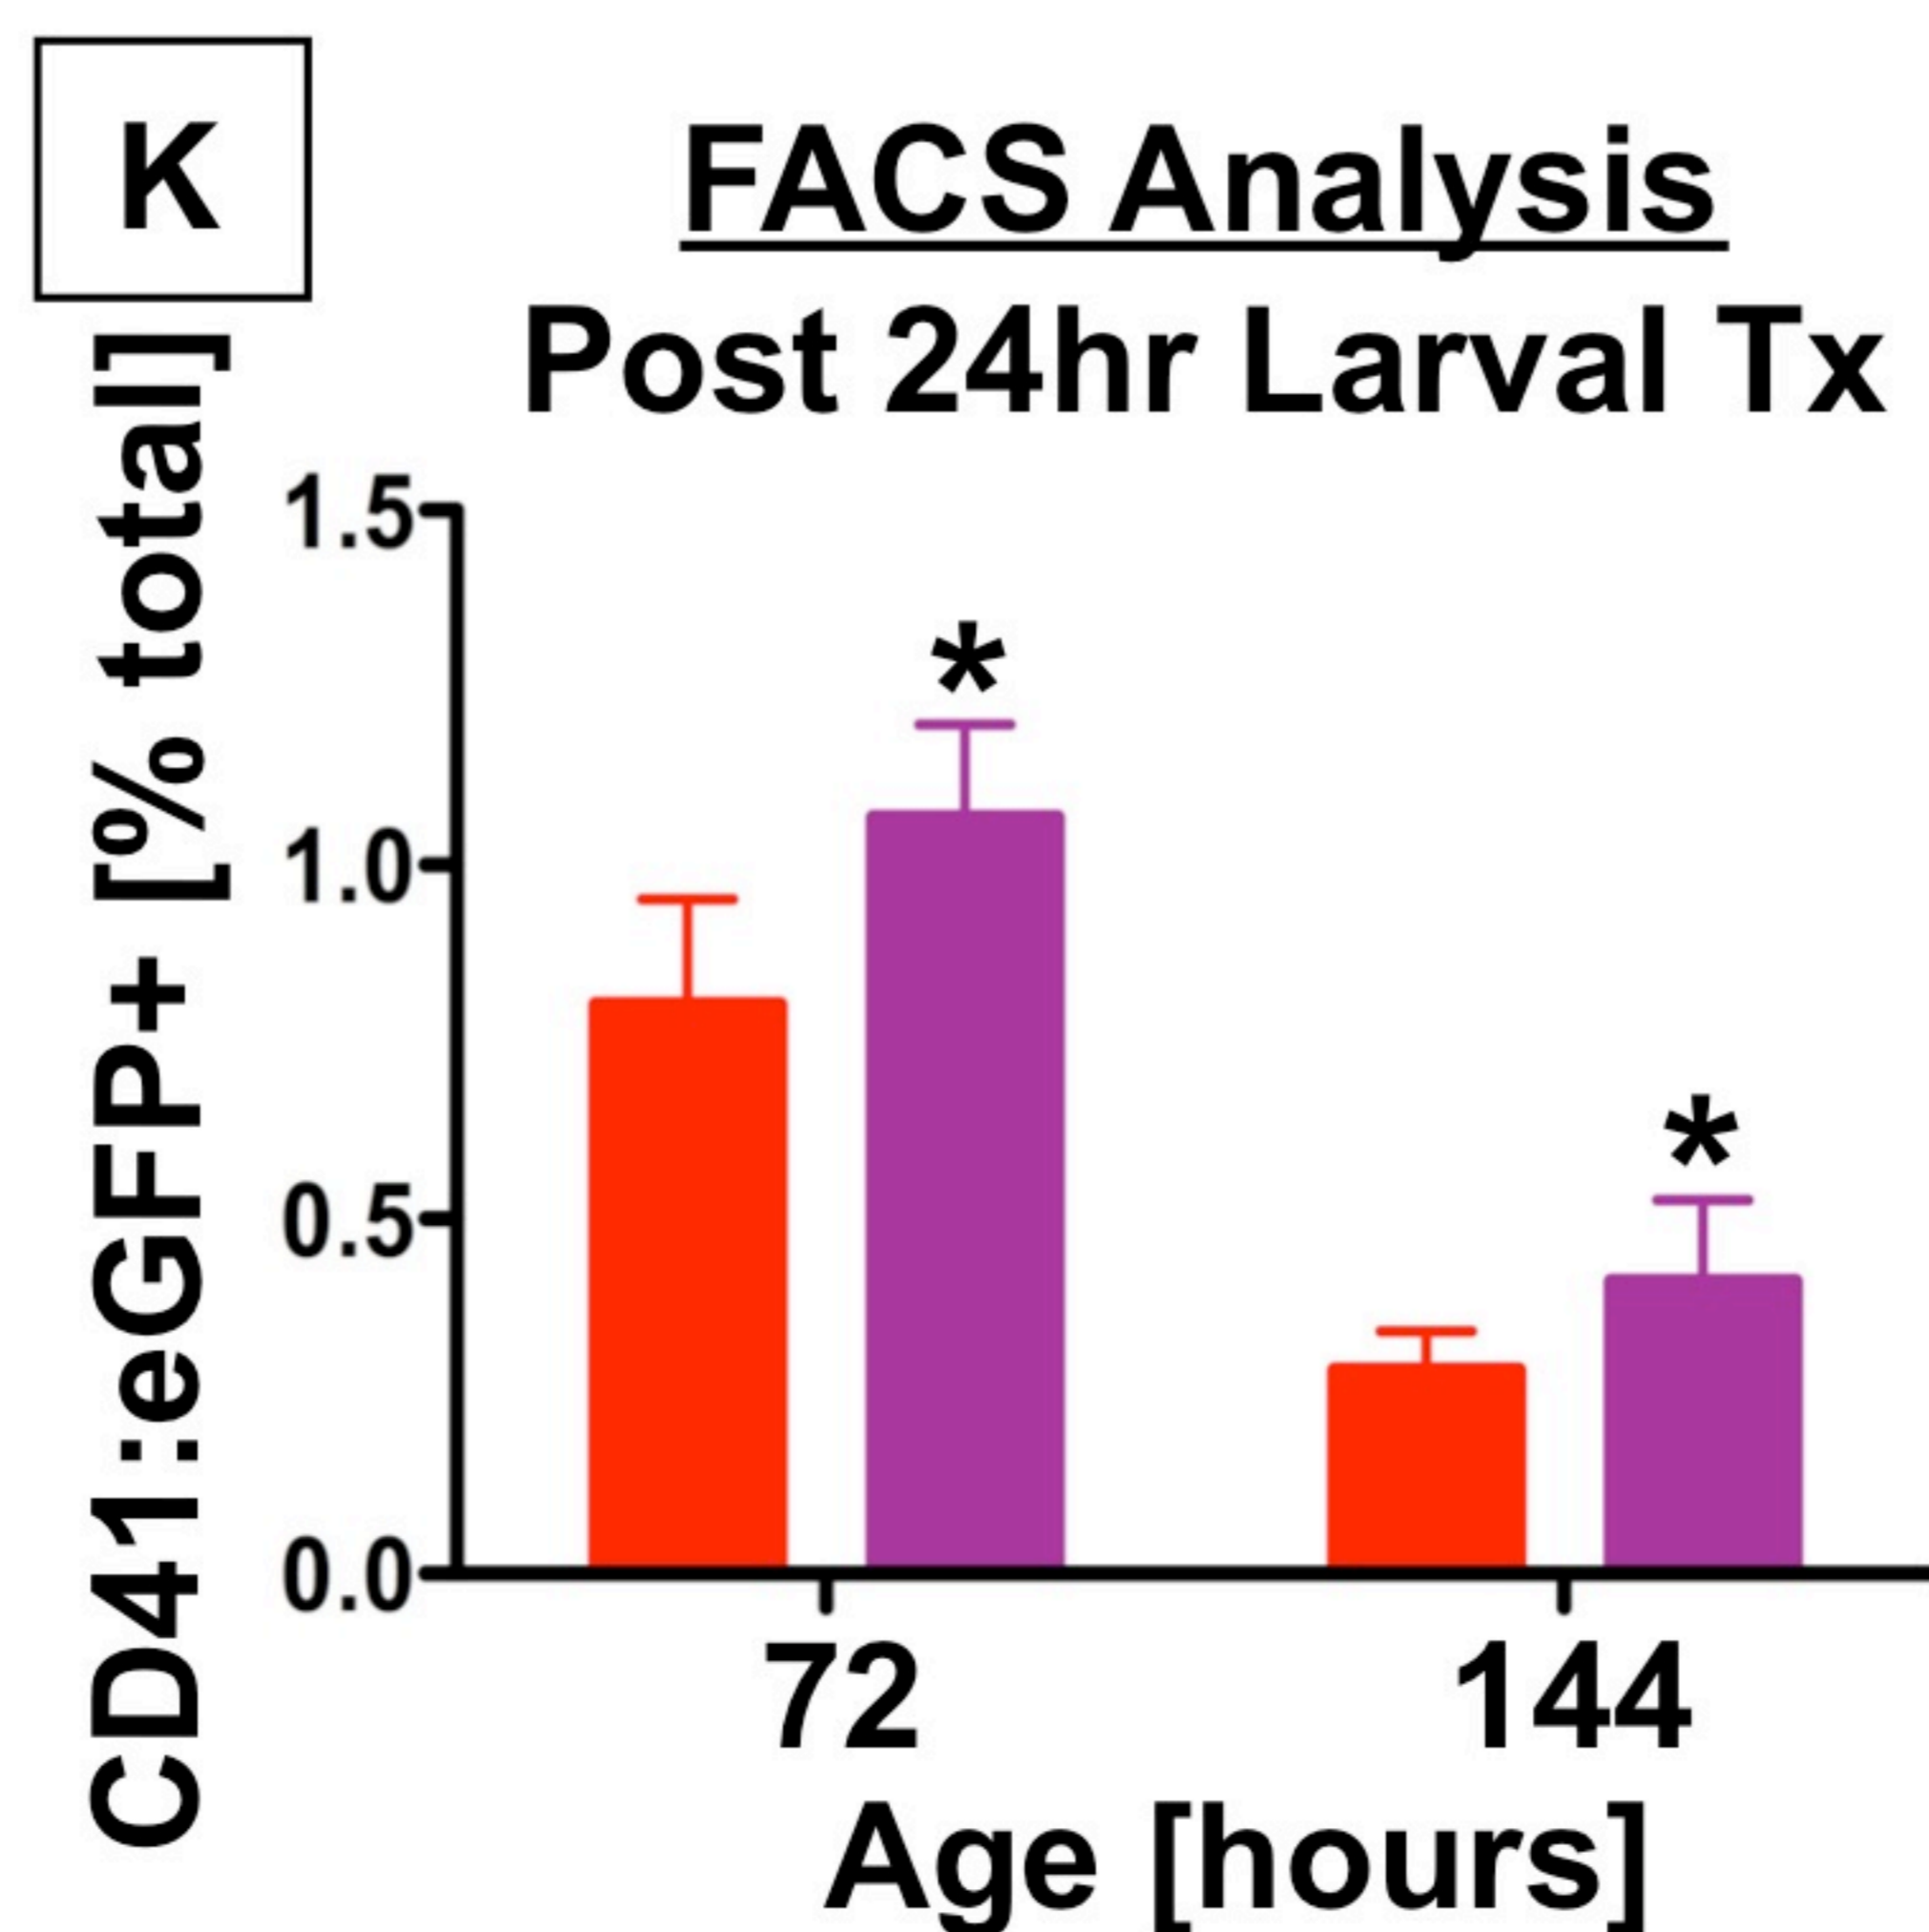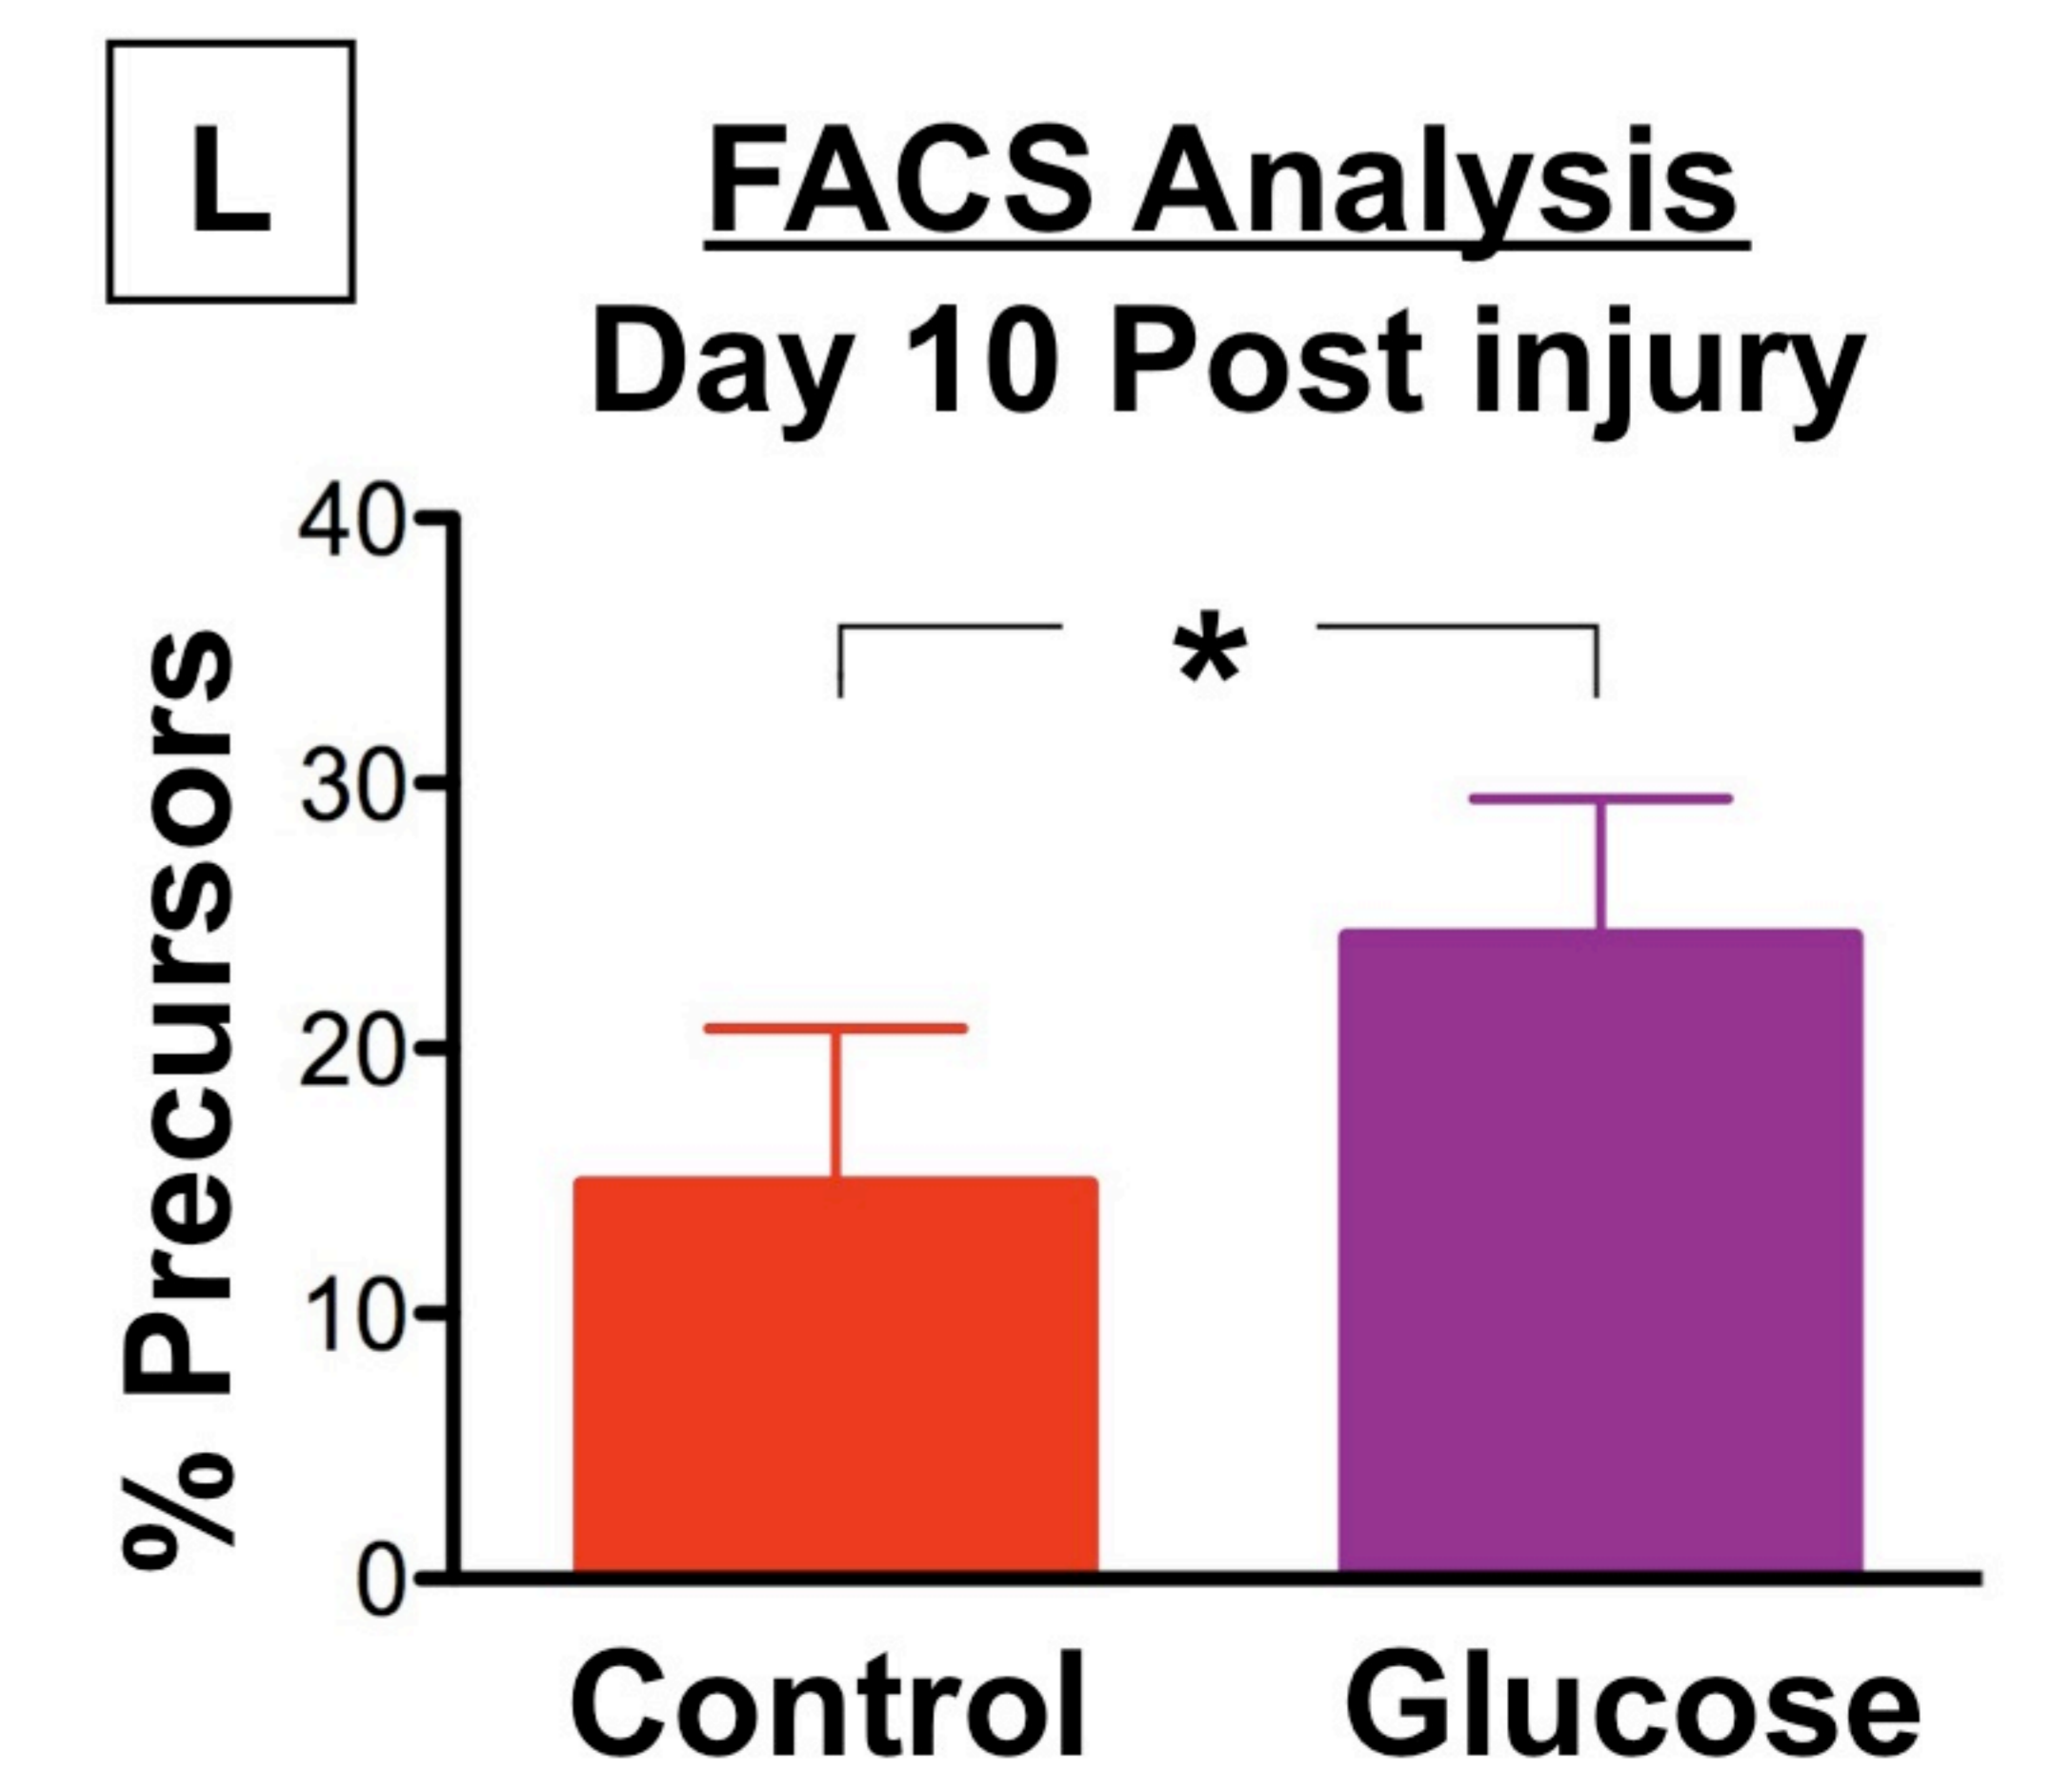

**S5A**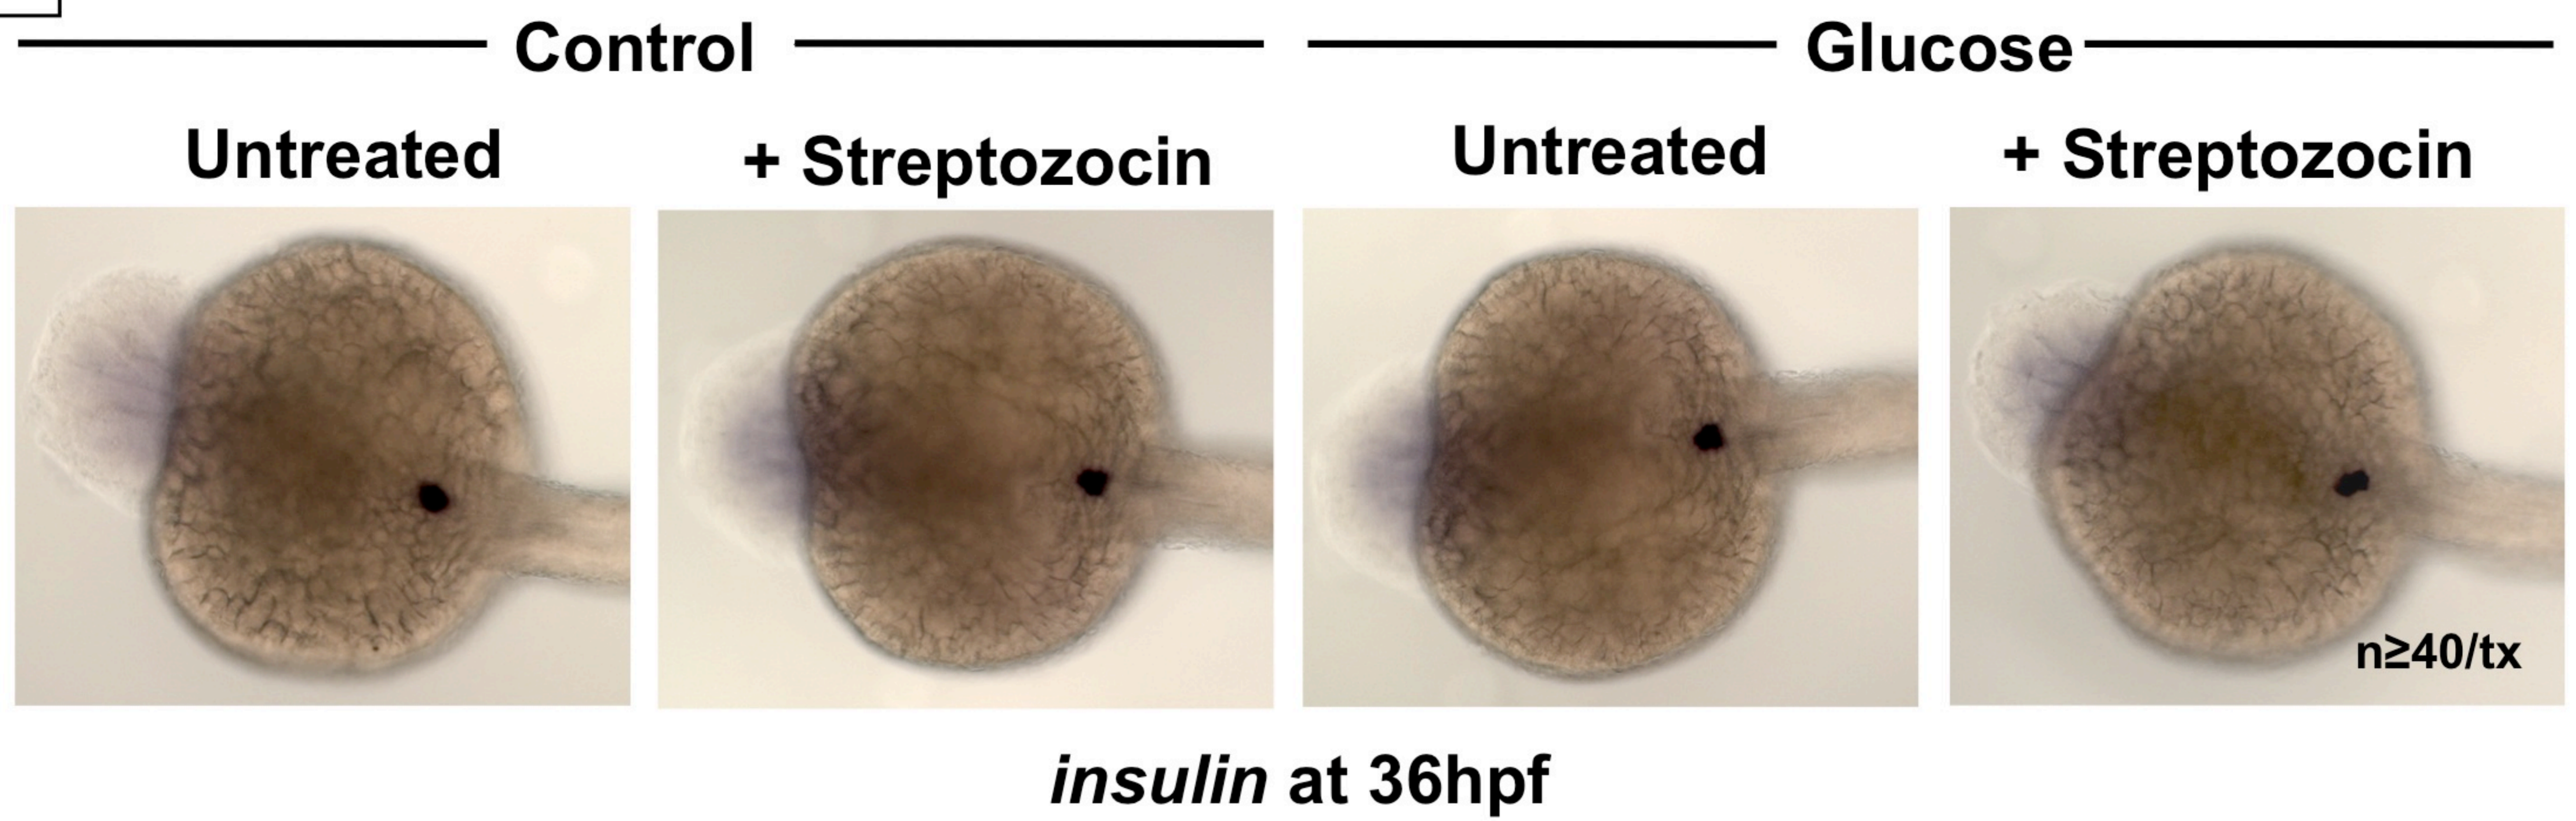**B**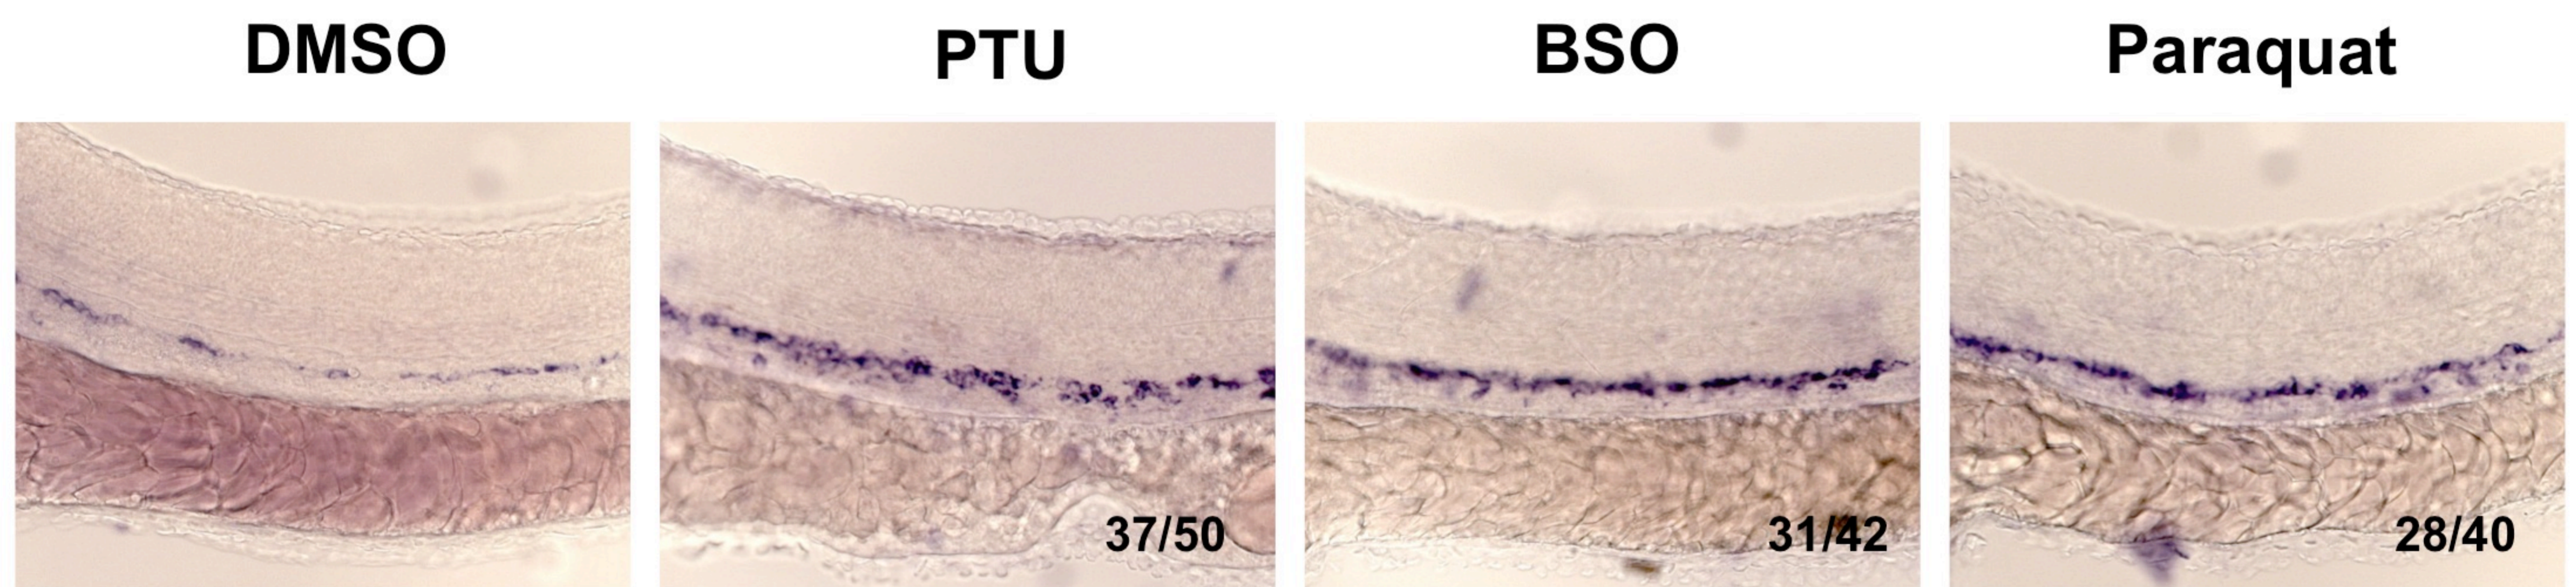**C**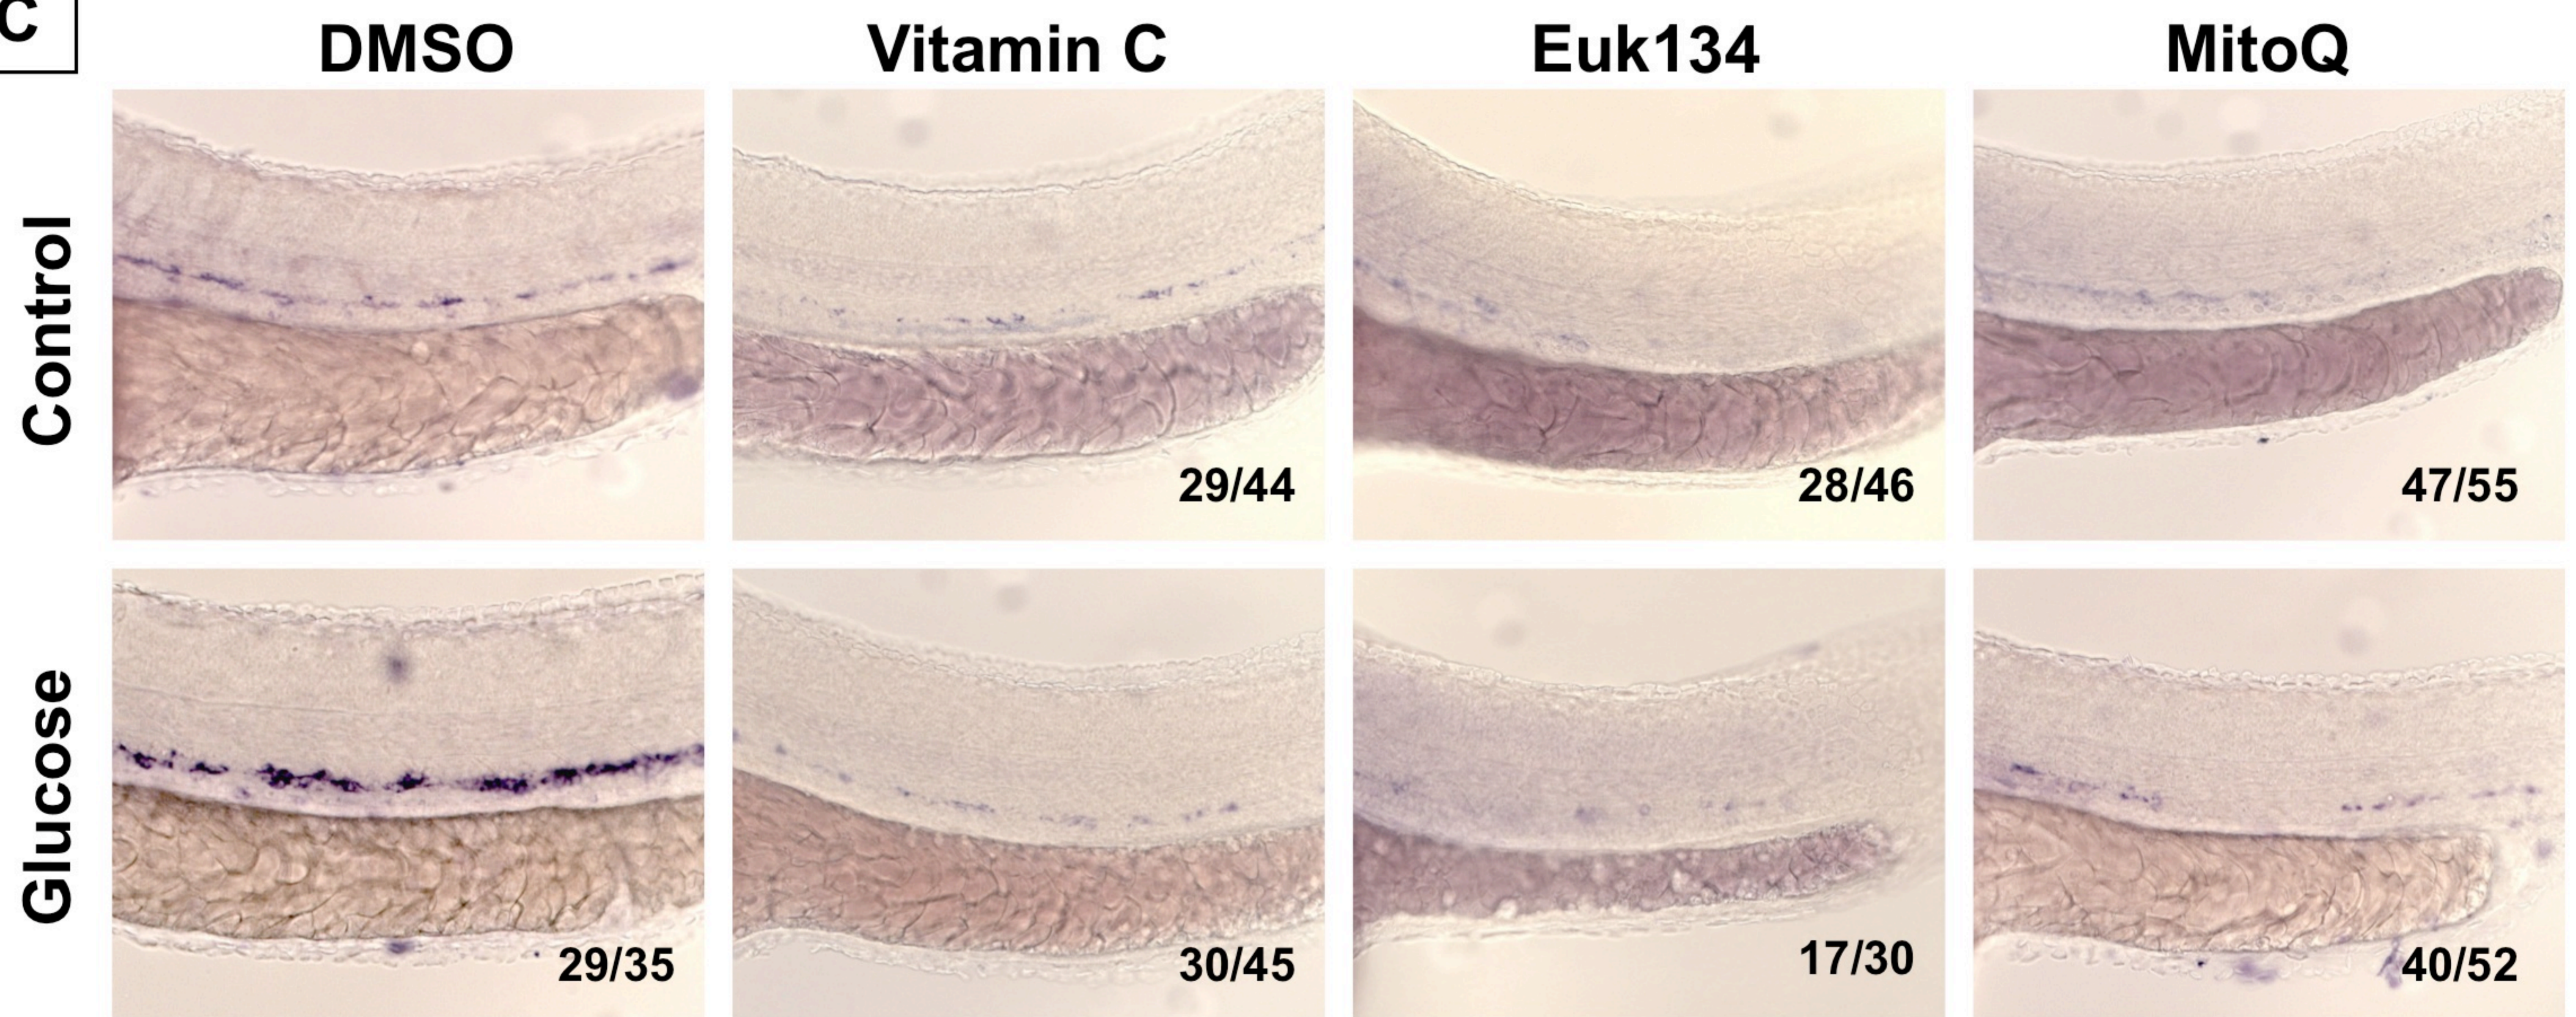*runx1/cmyb* at 36hpf**D**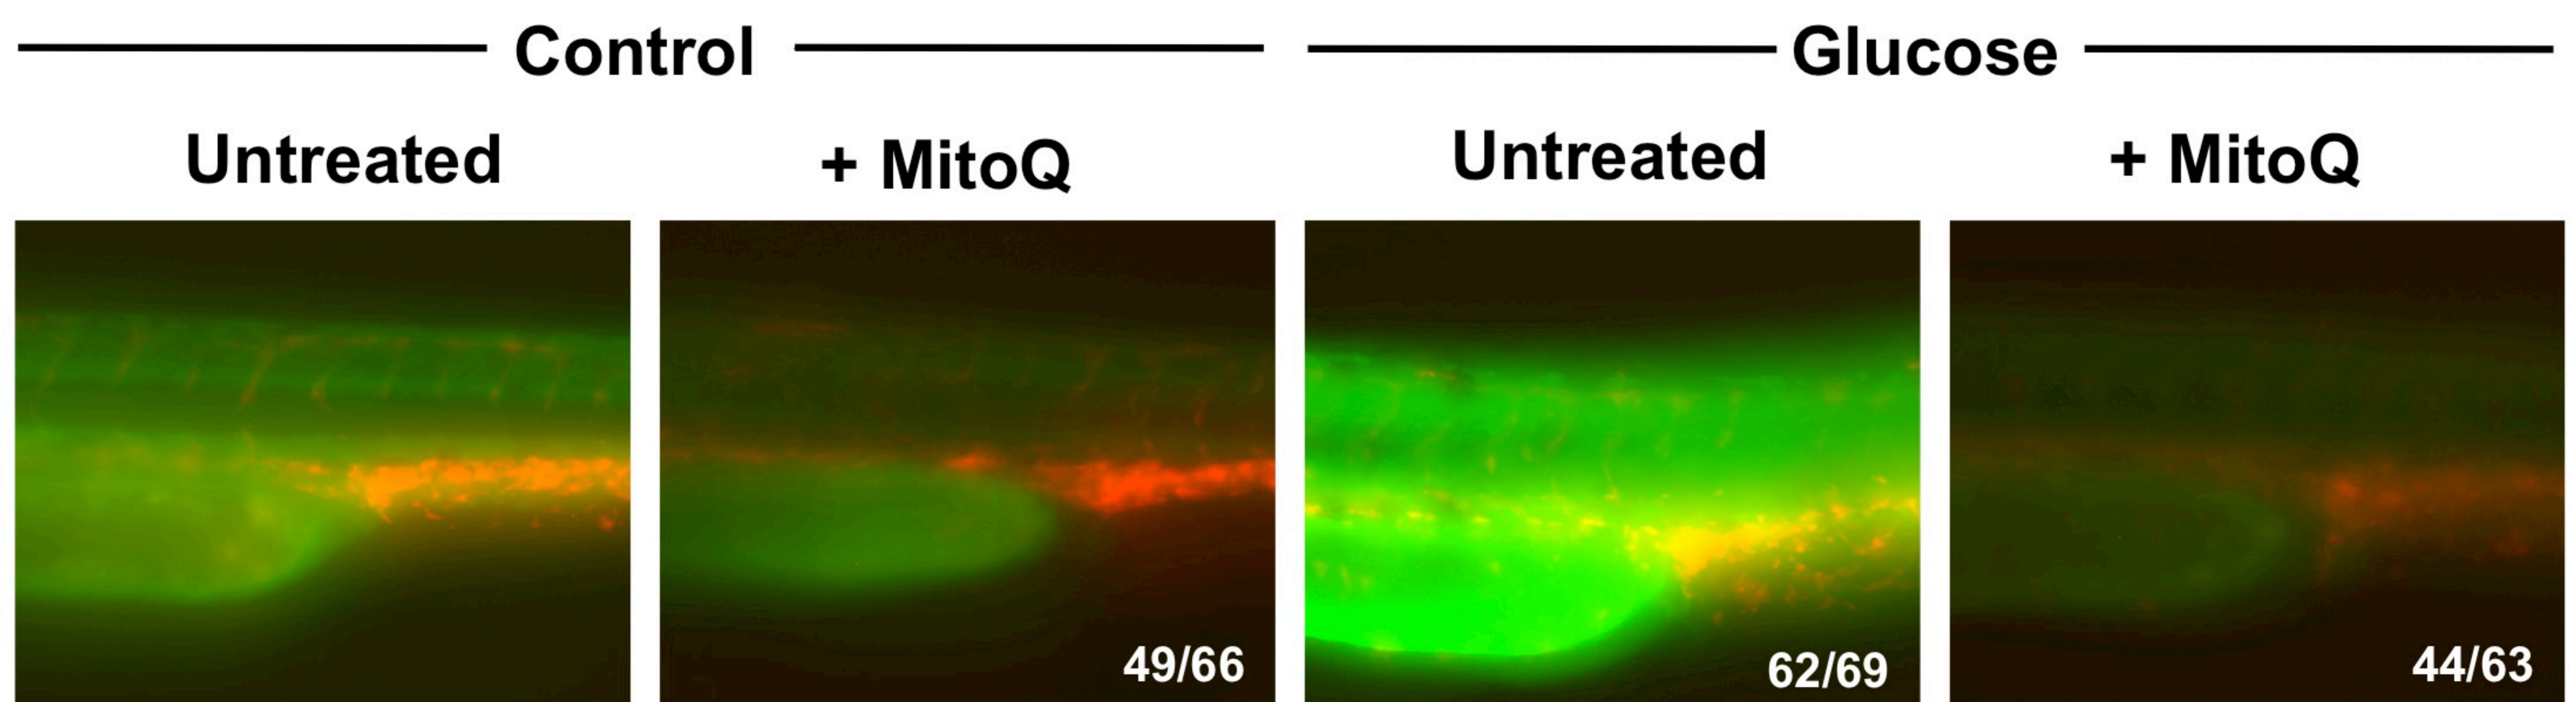PeroxyFluor 2 H<sub>2</sub>O<sub>2</sub>-reporter; *Imo2:dsRed* at 36hpf



**S7A****Control****Glucose**View  
side  
AGM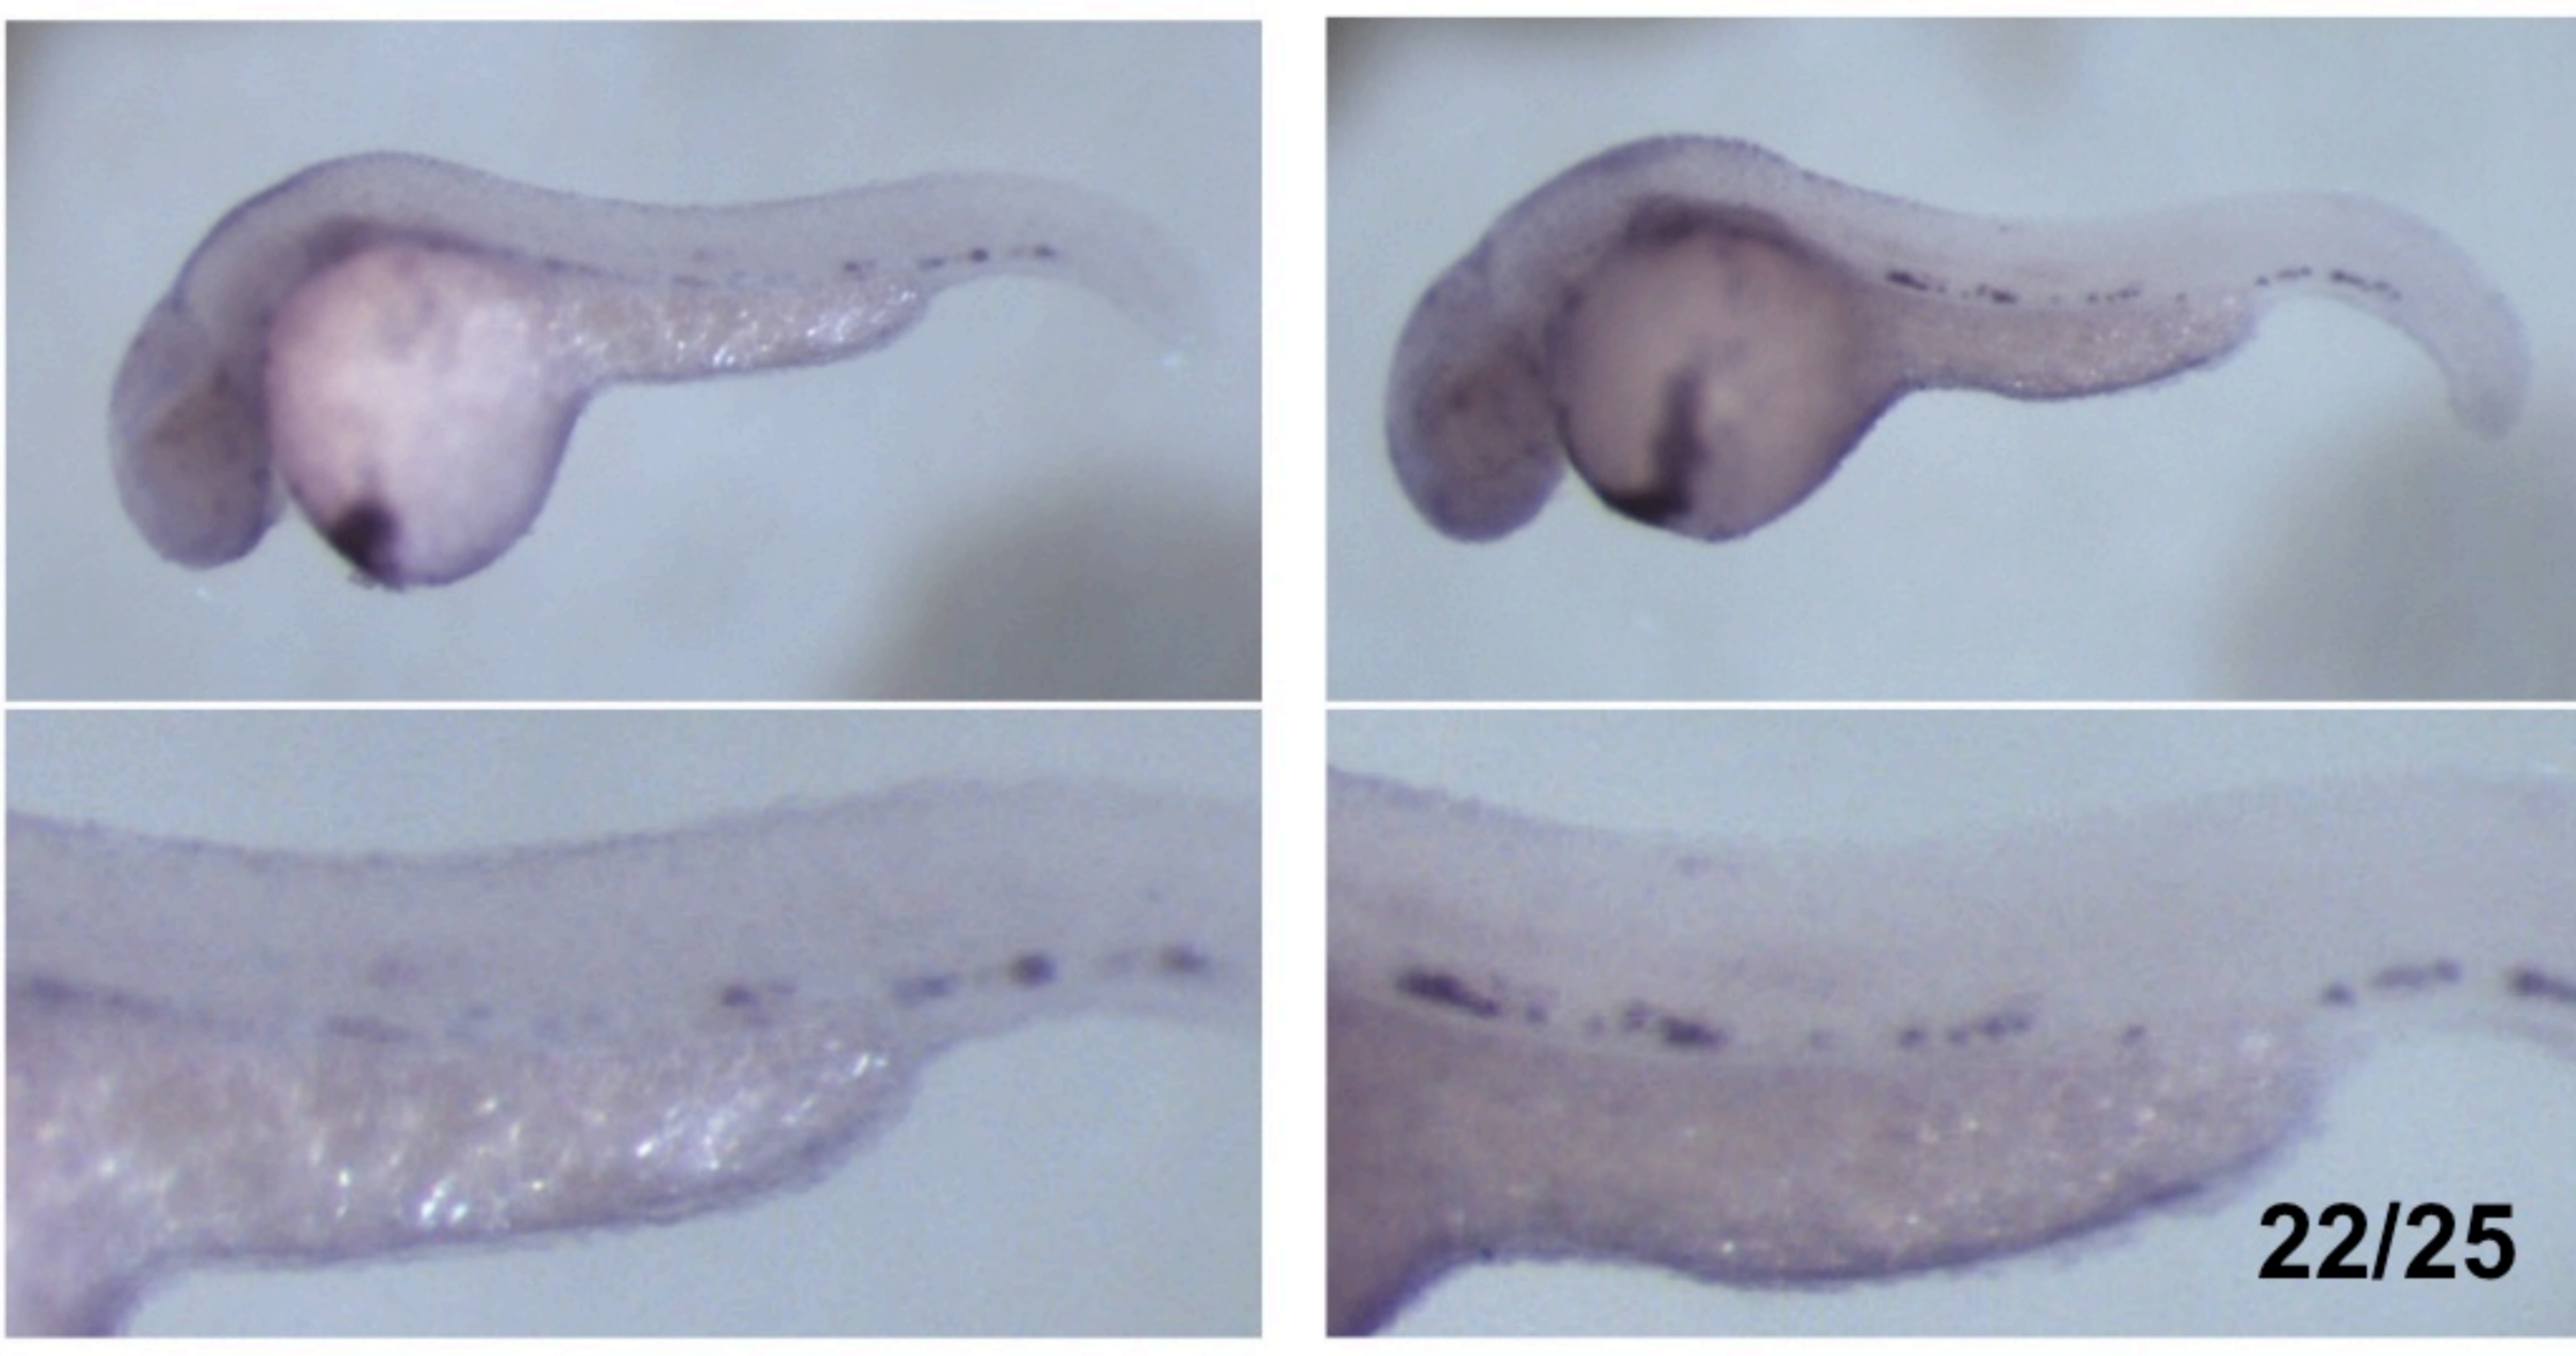*hif1a* at 36hpf**B****qPCR Analysis at 36hpf**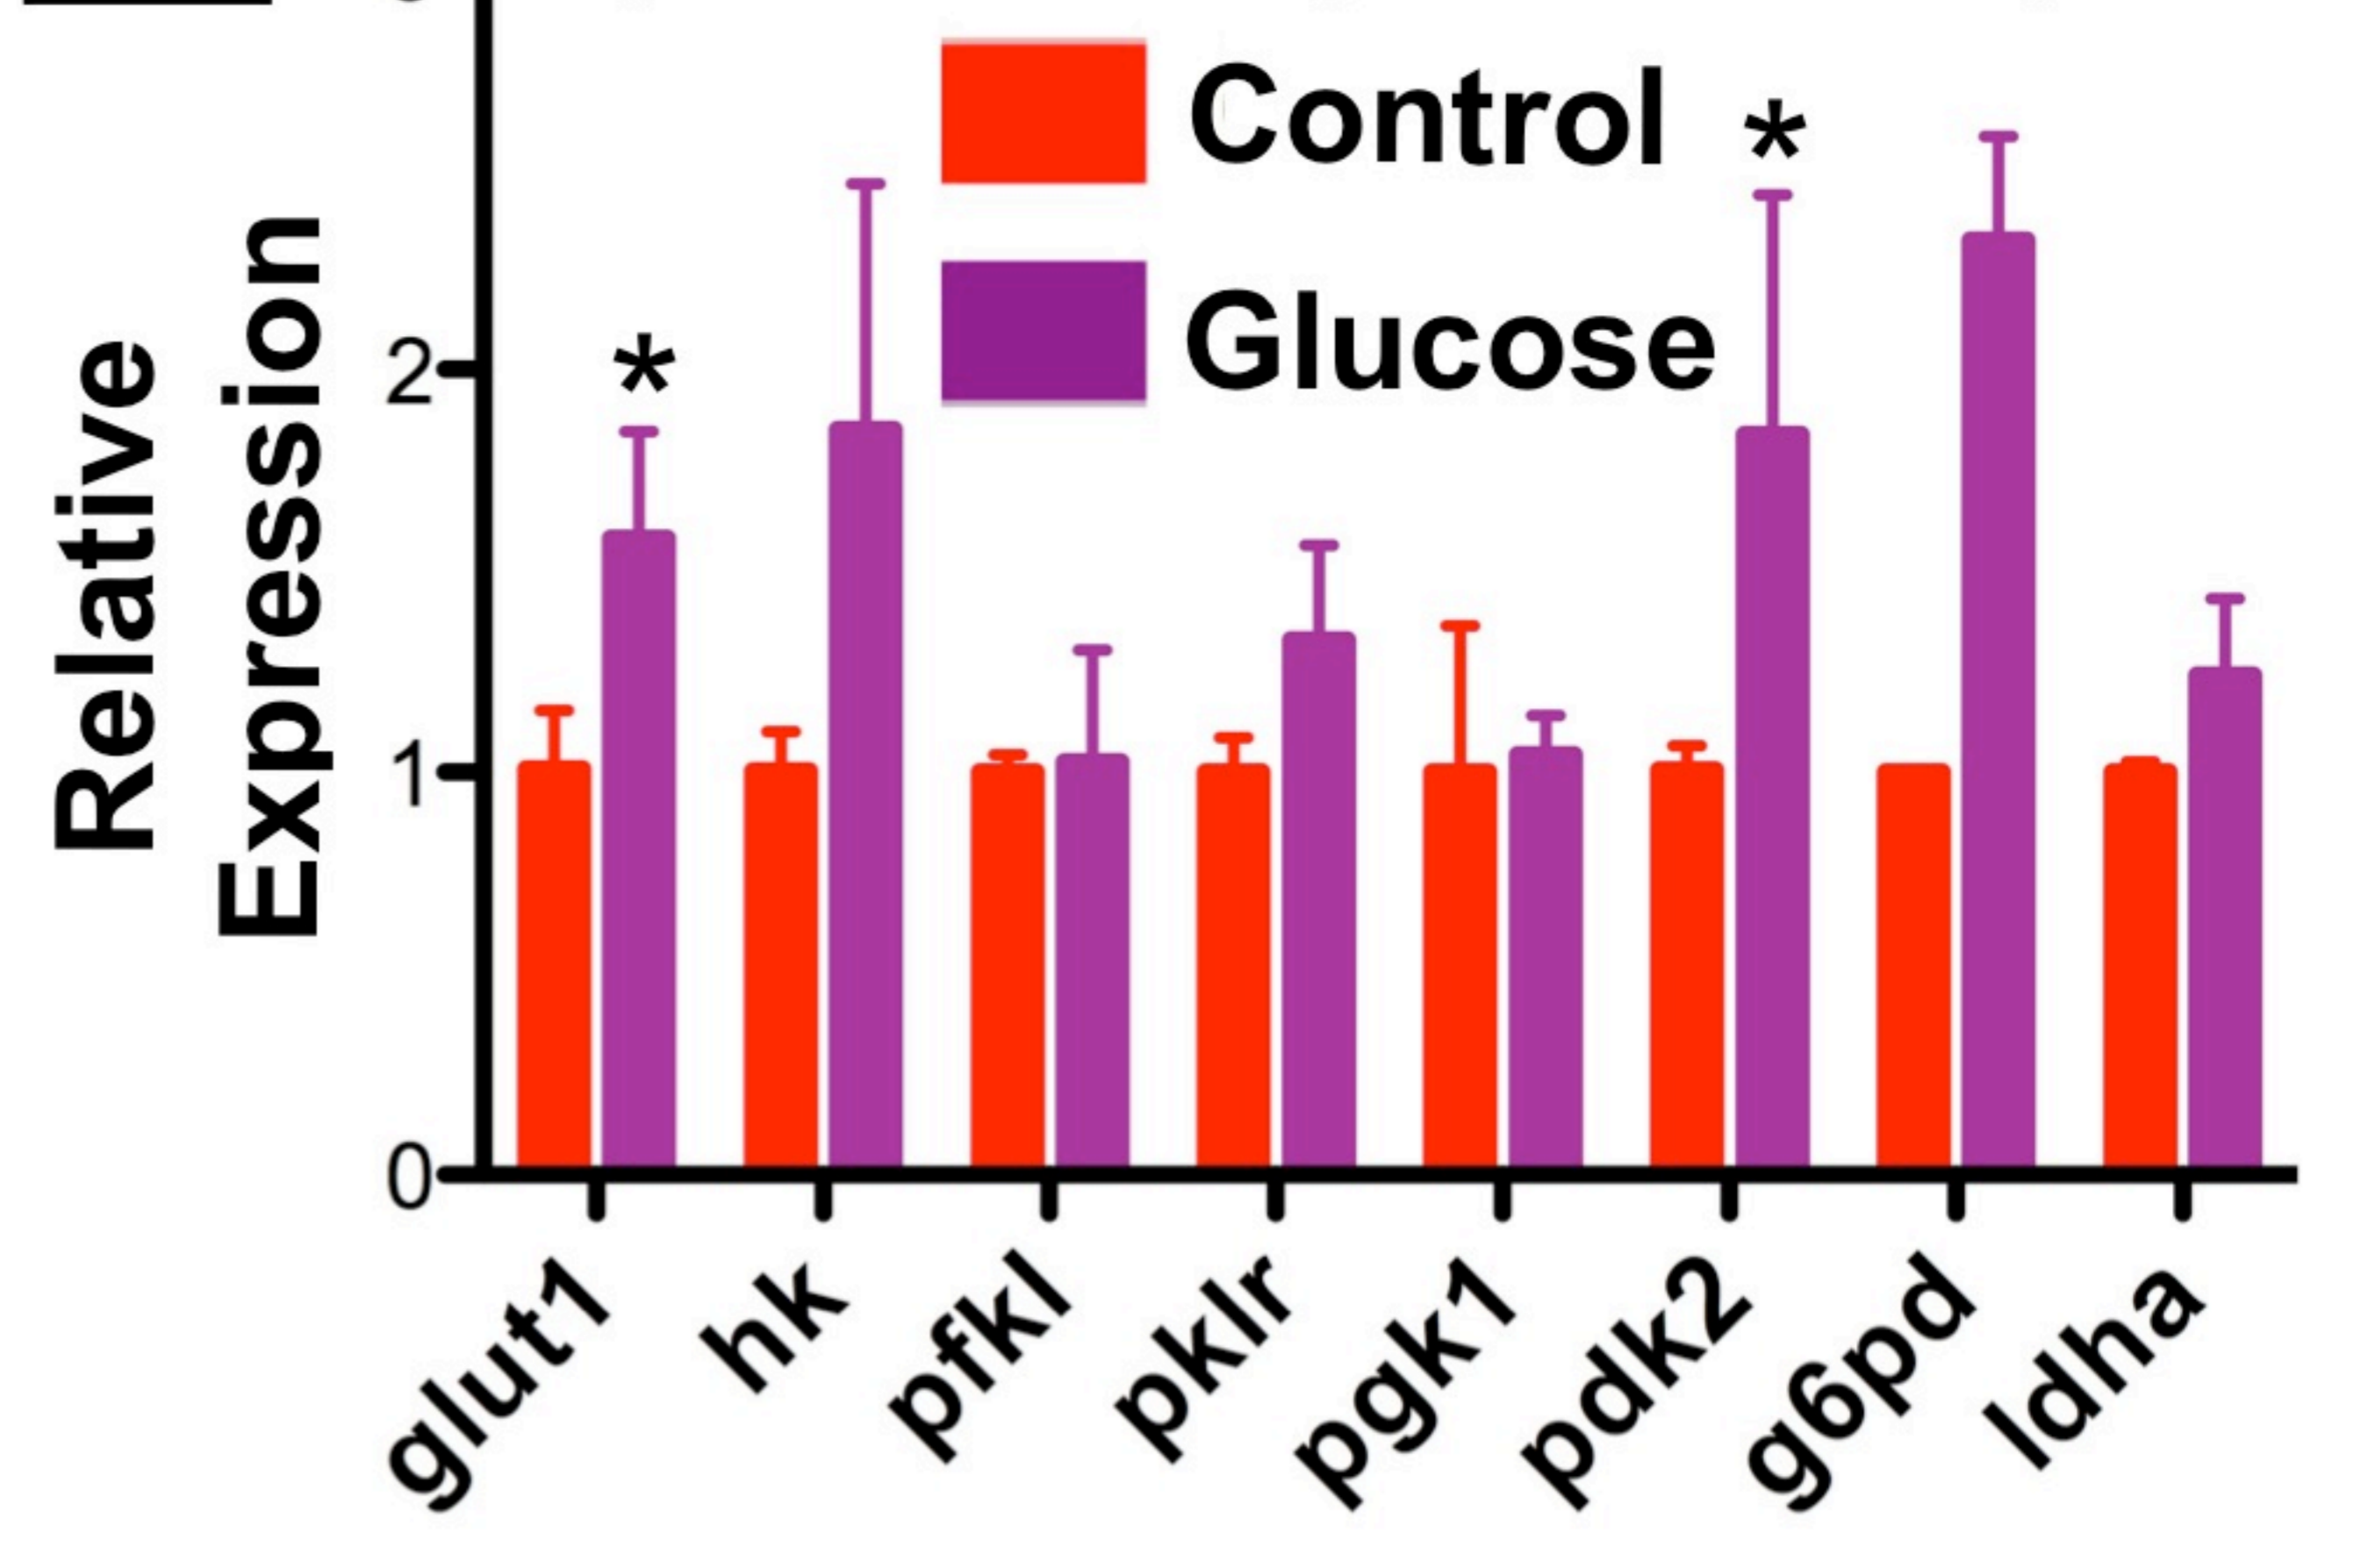**C****Control****Glucose**View  
side  
top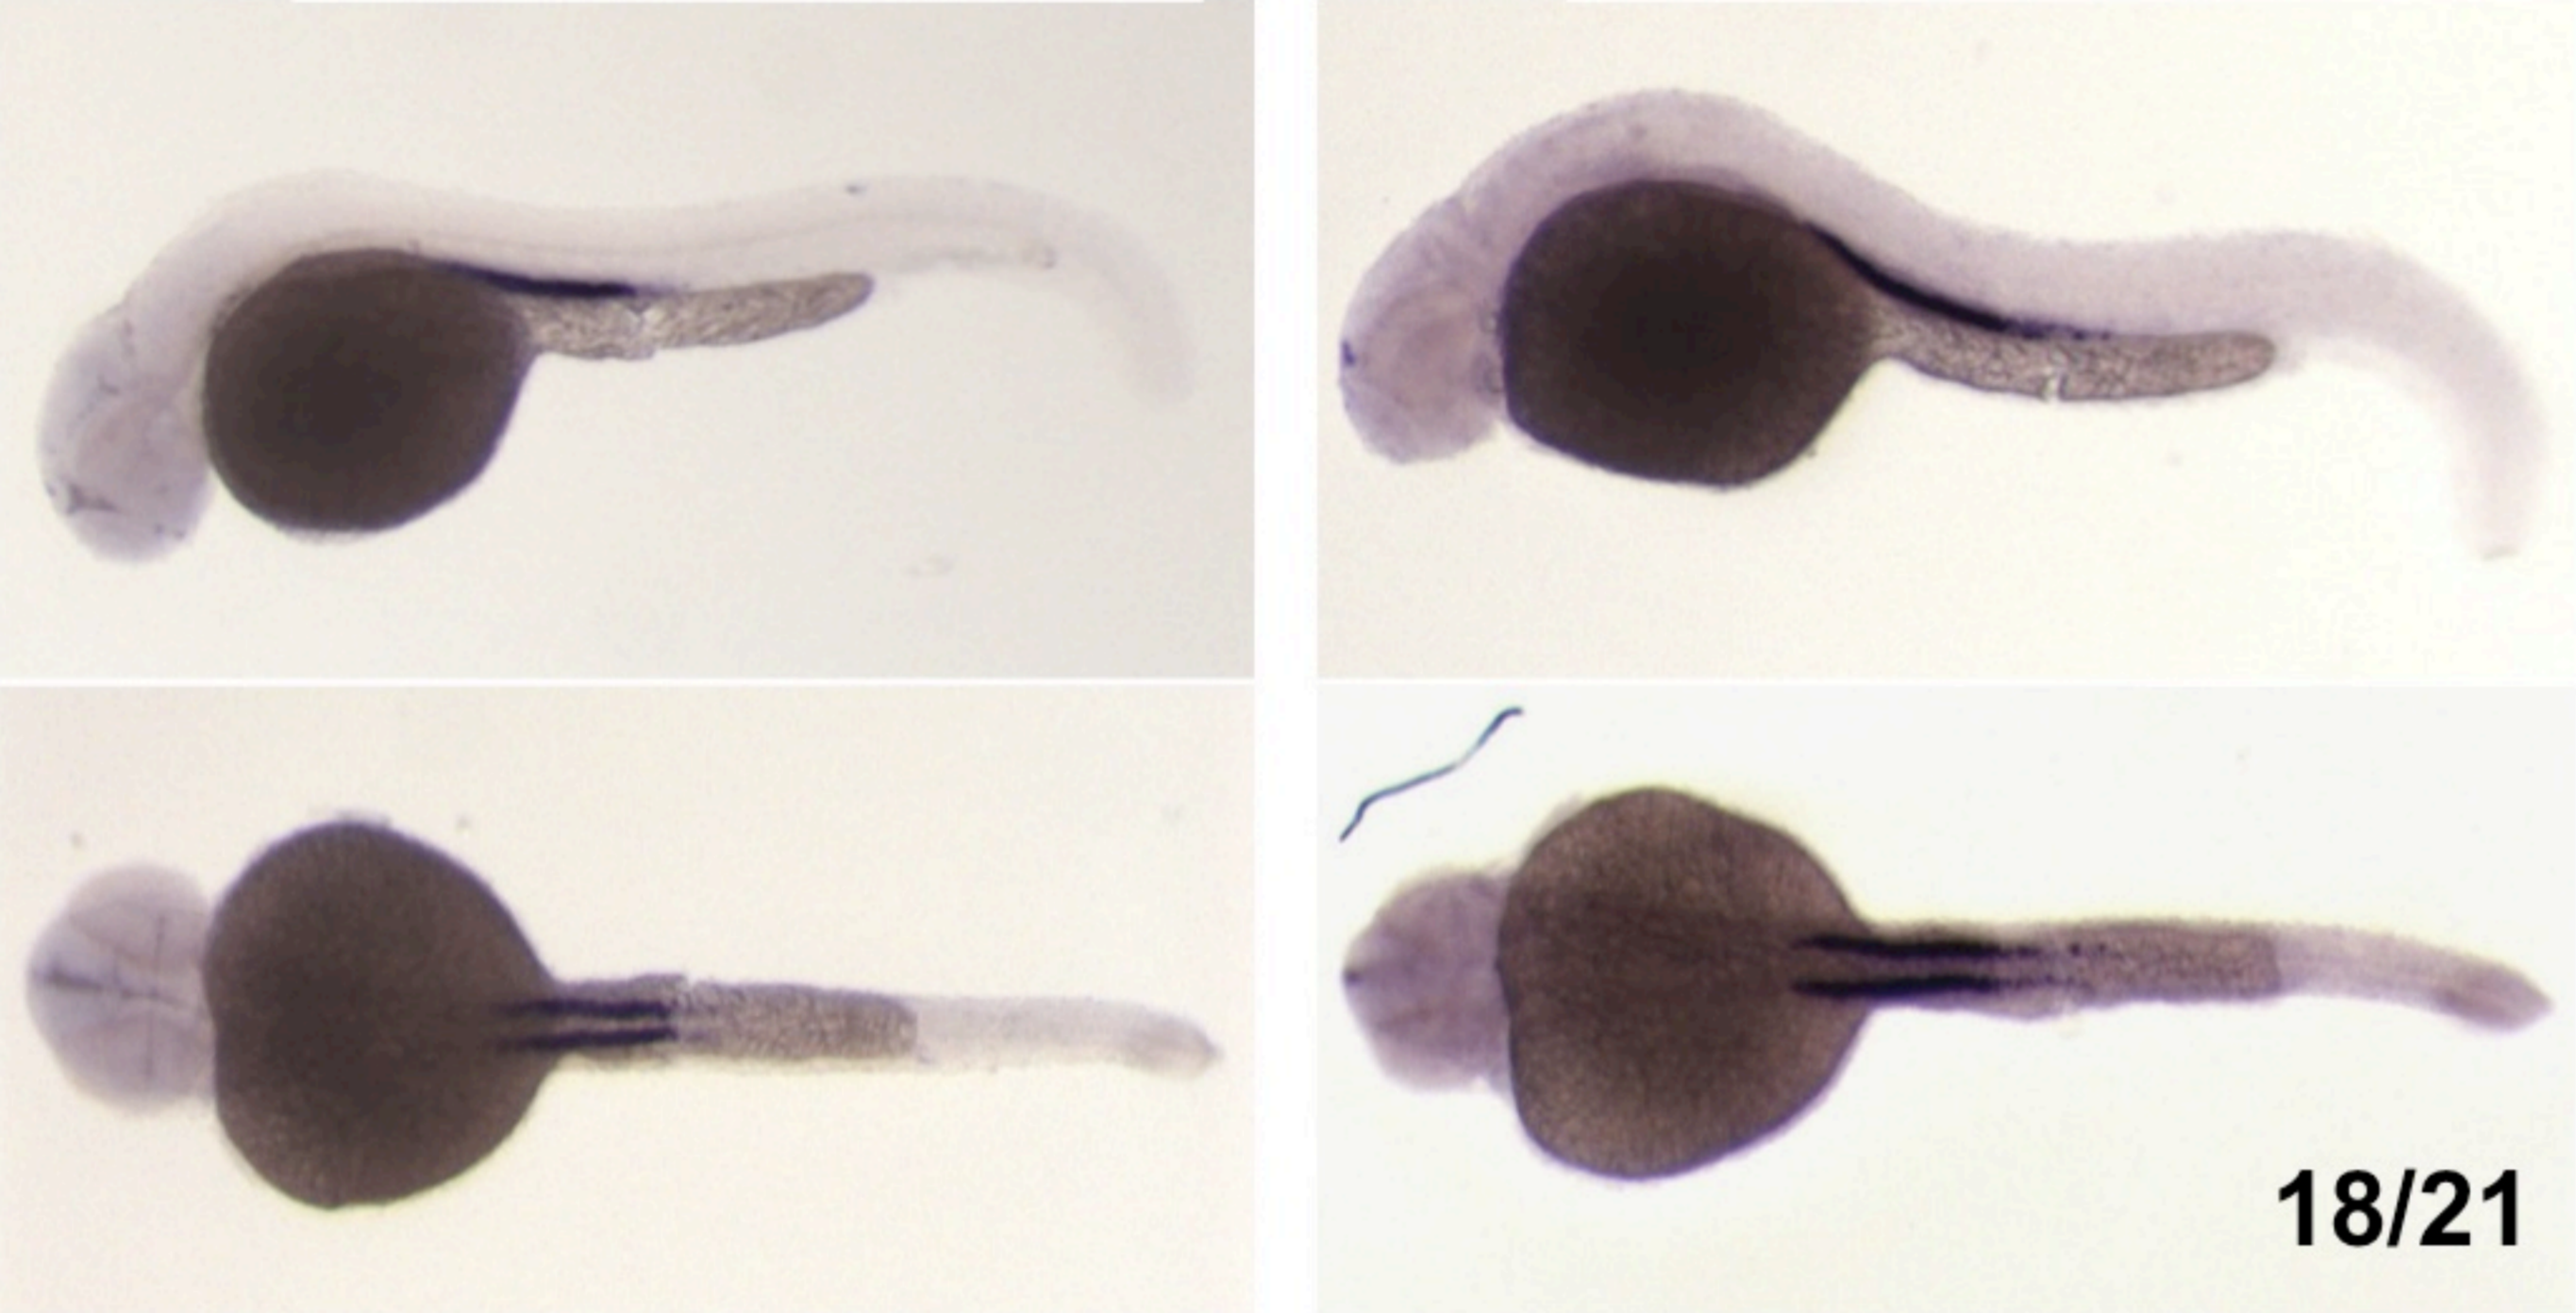*glut1* at 36hpf**D****cmyb:GFP/lmo2:dsRed****Microscopy**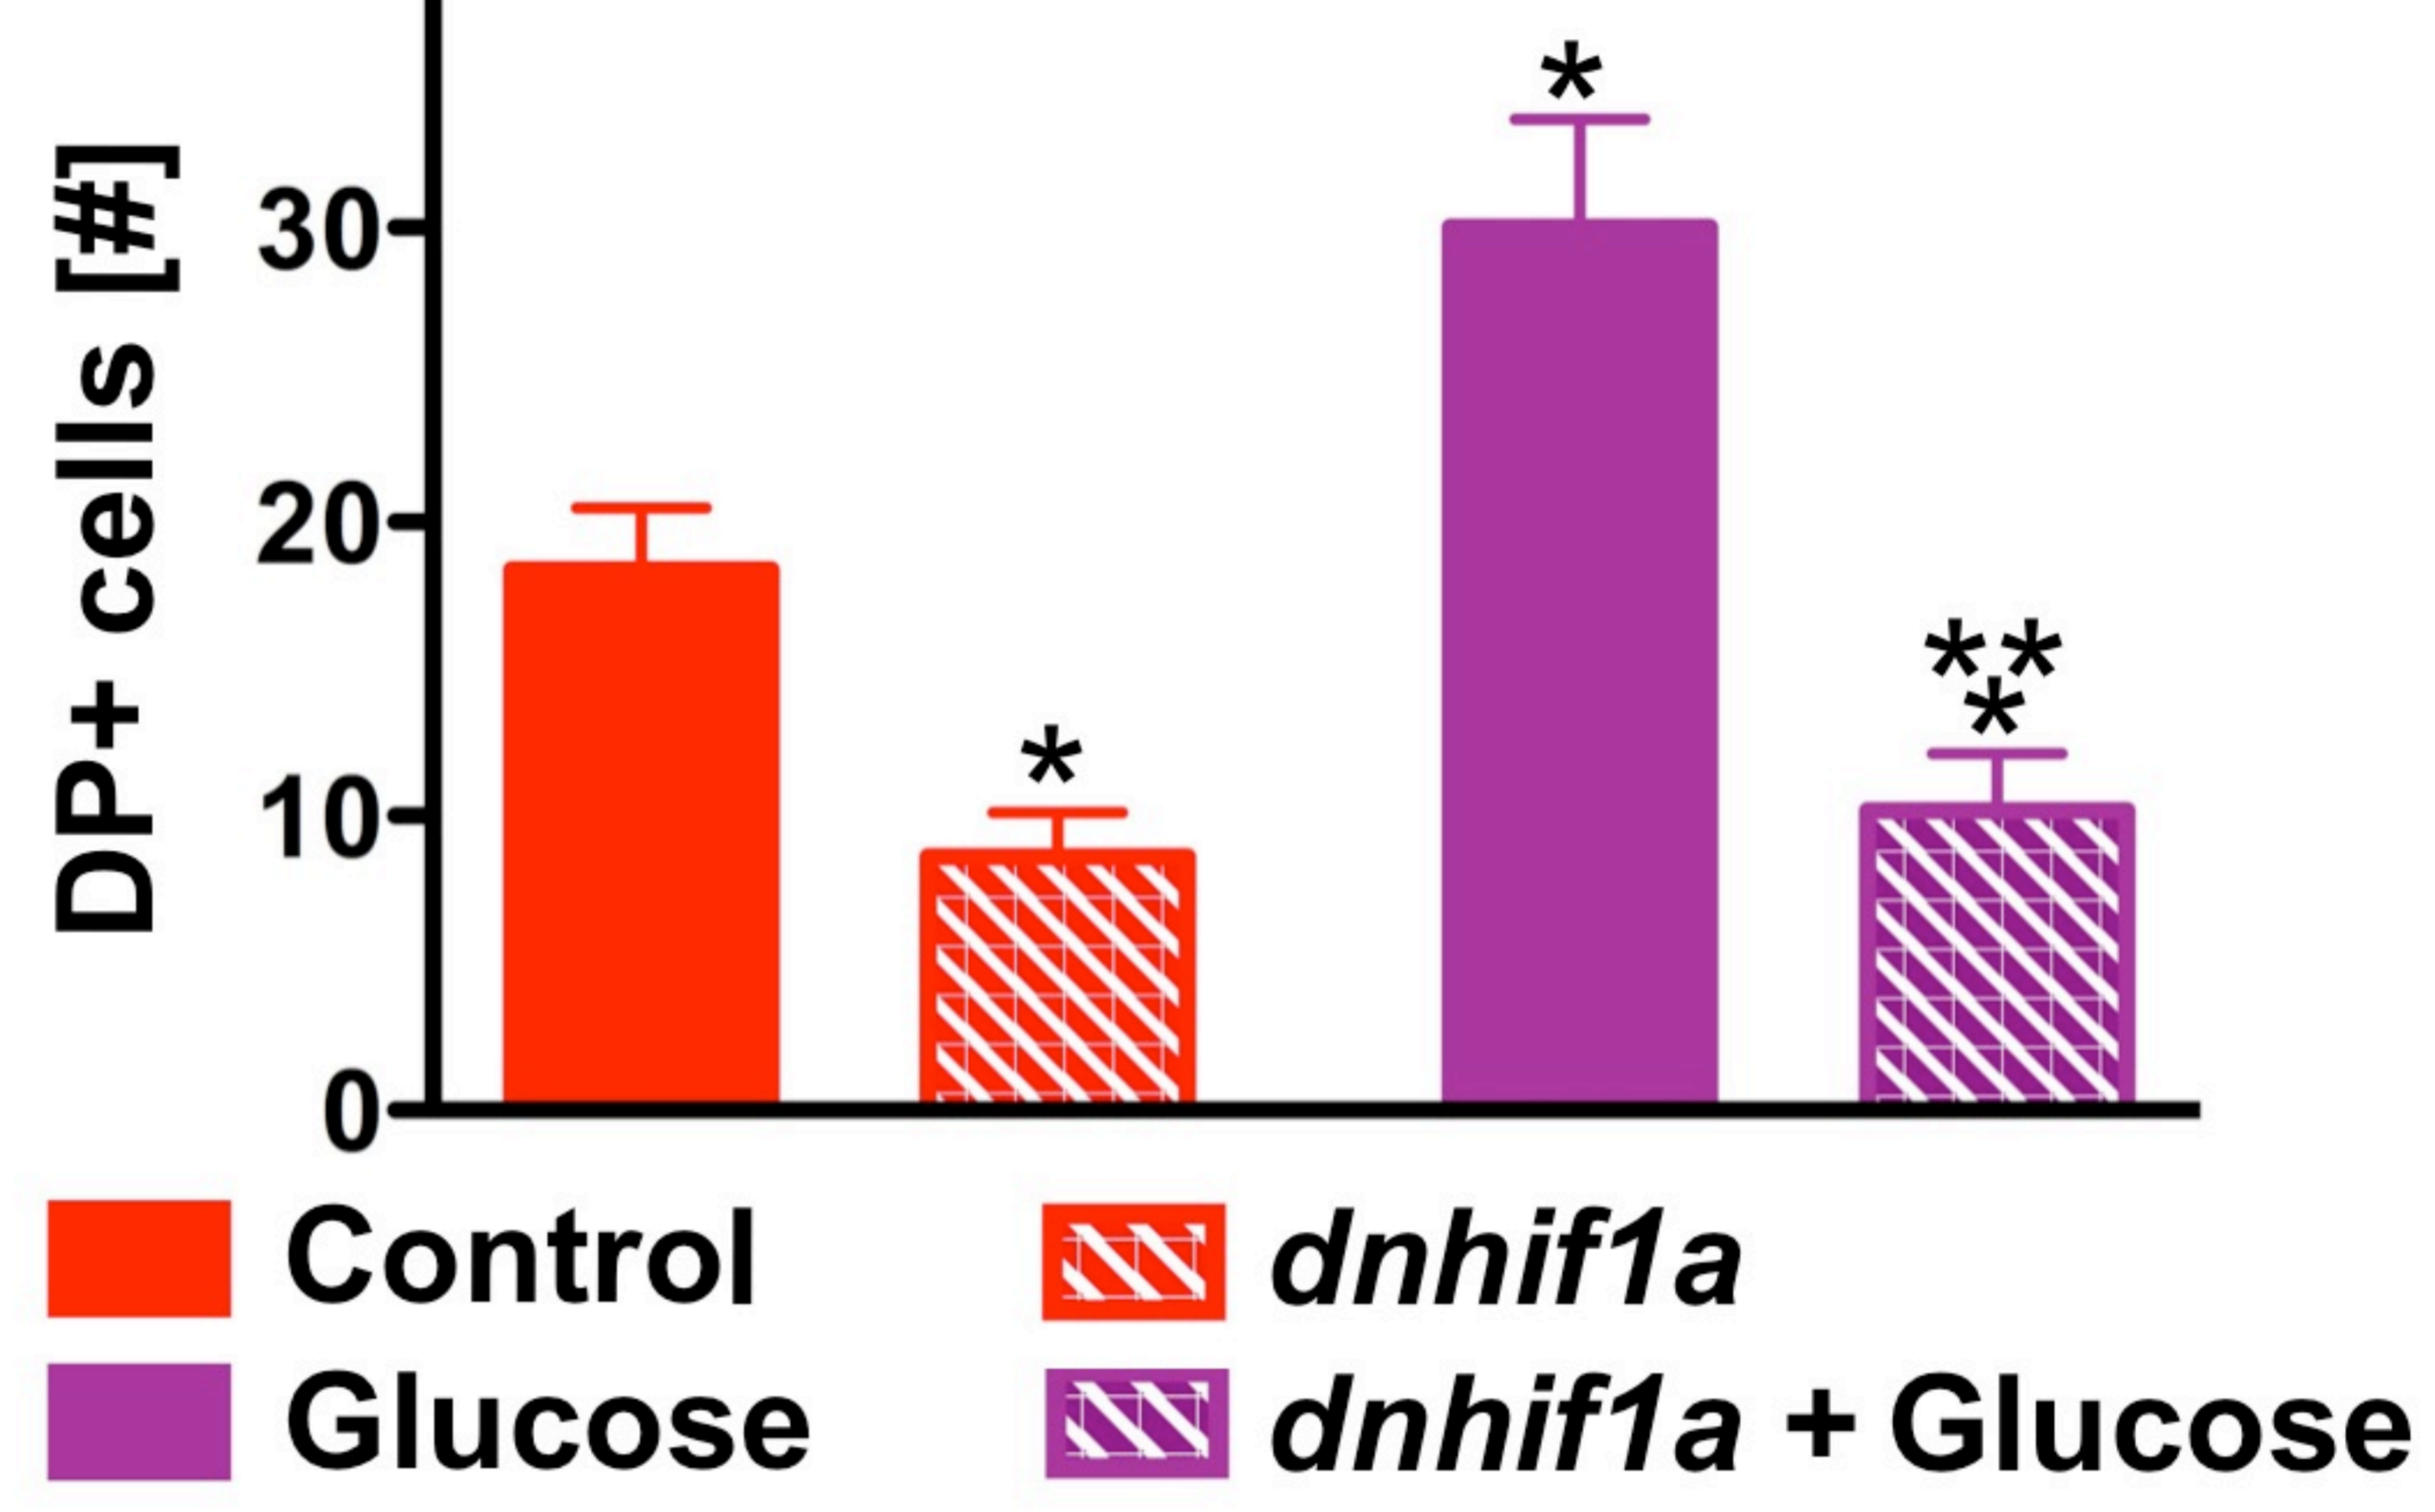**E****Control****Glucose**Untreated  
*dnhif1a*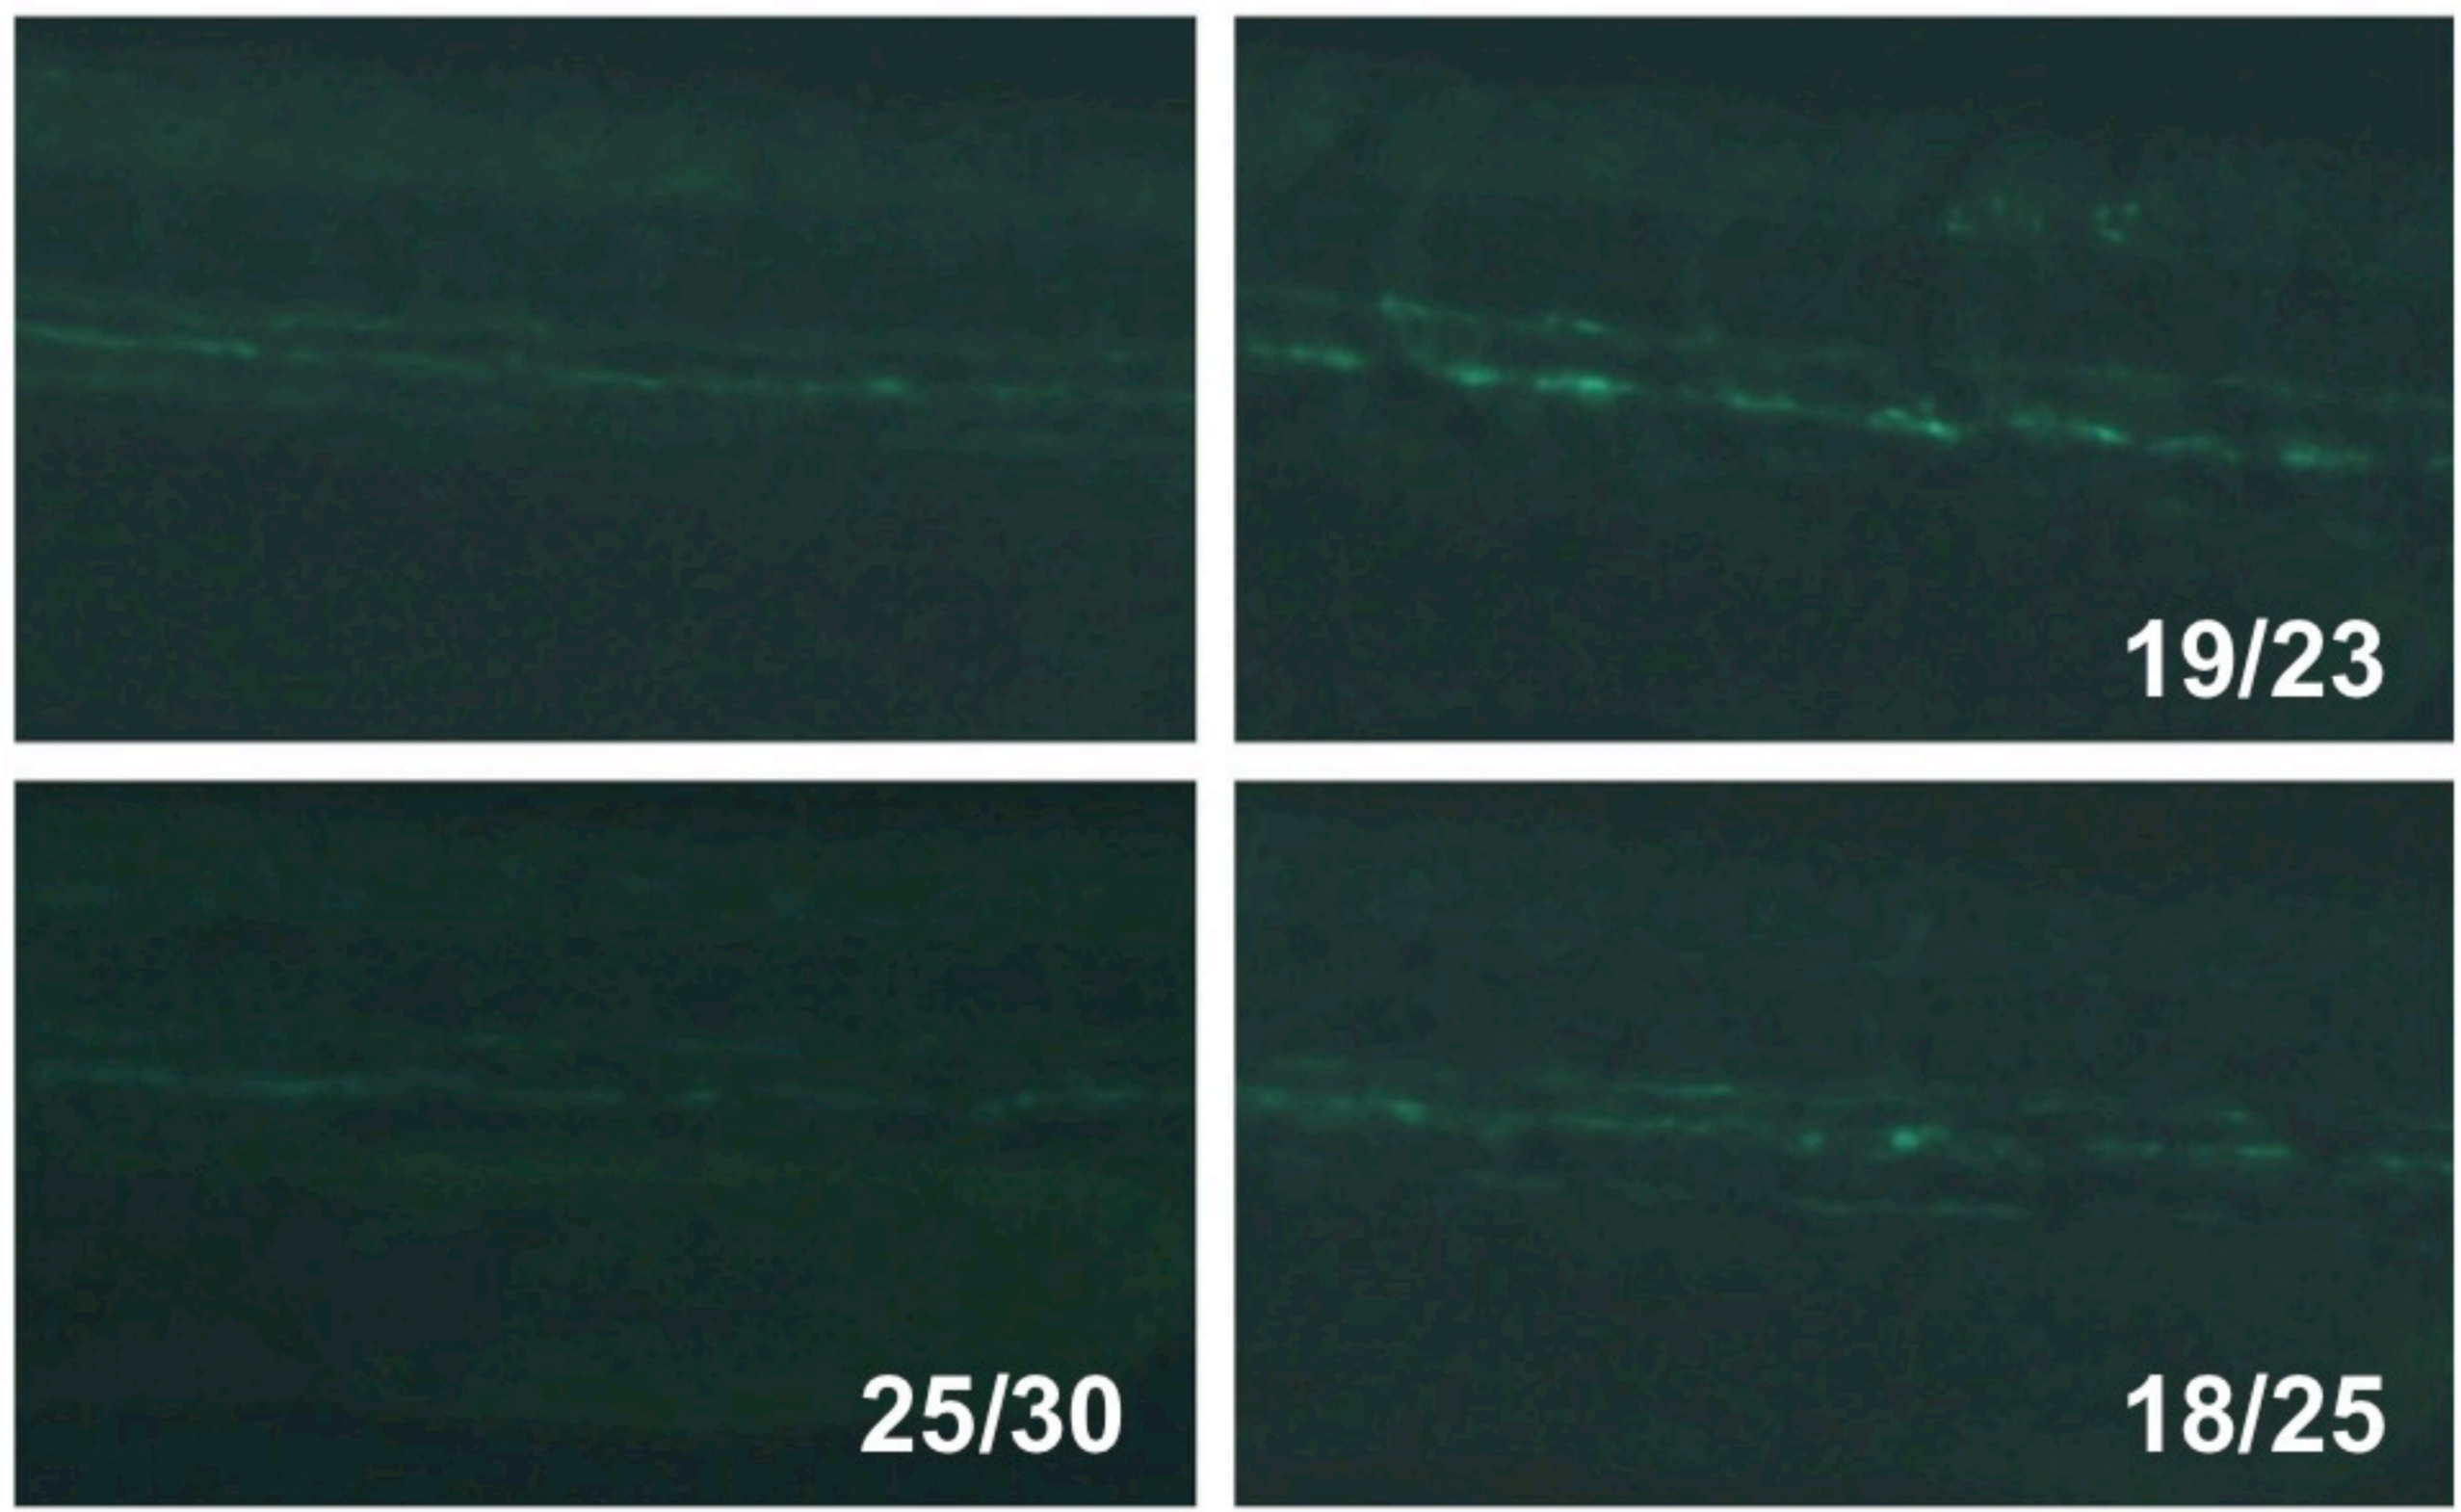*runx1:eGFP* at 36hpf**F****Control****Glucose**Untreated  
*dnhif1a*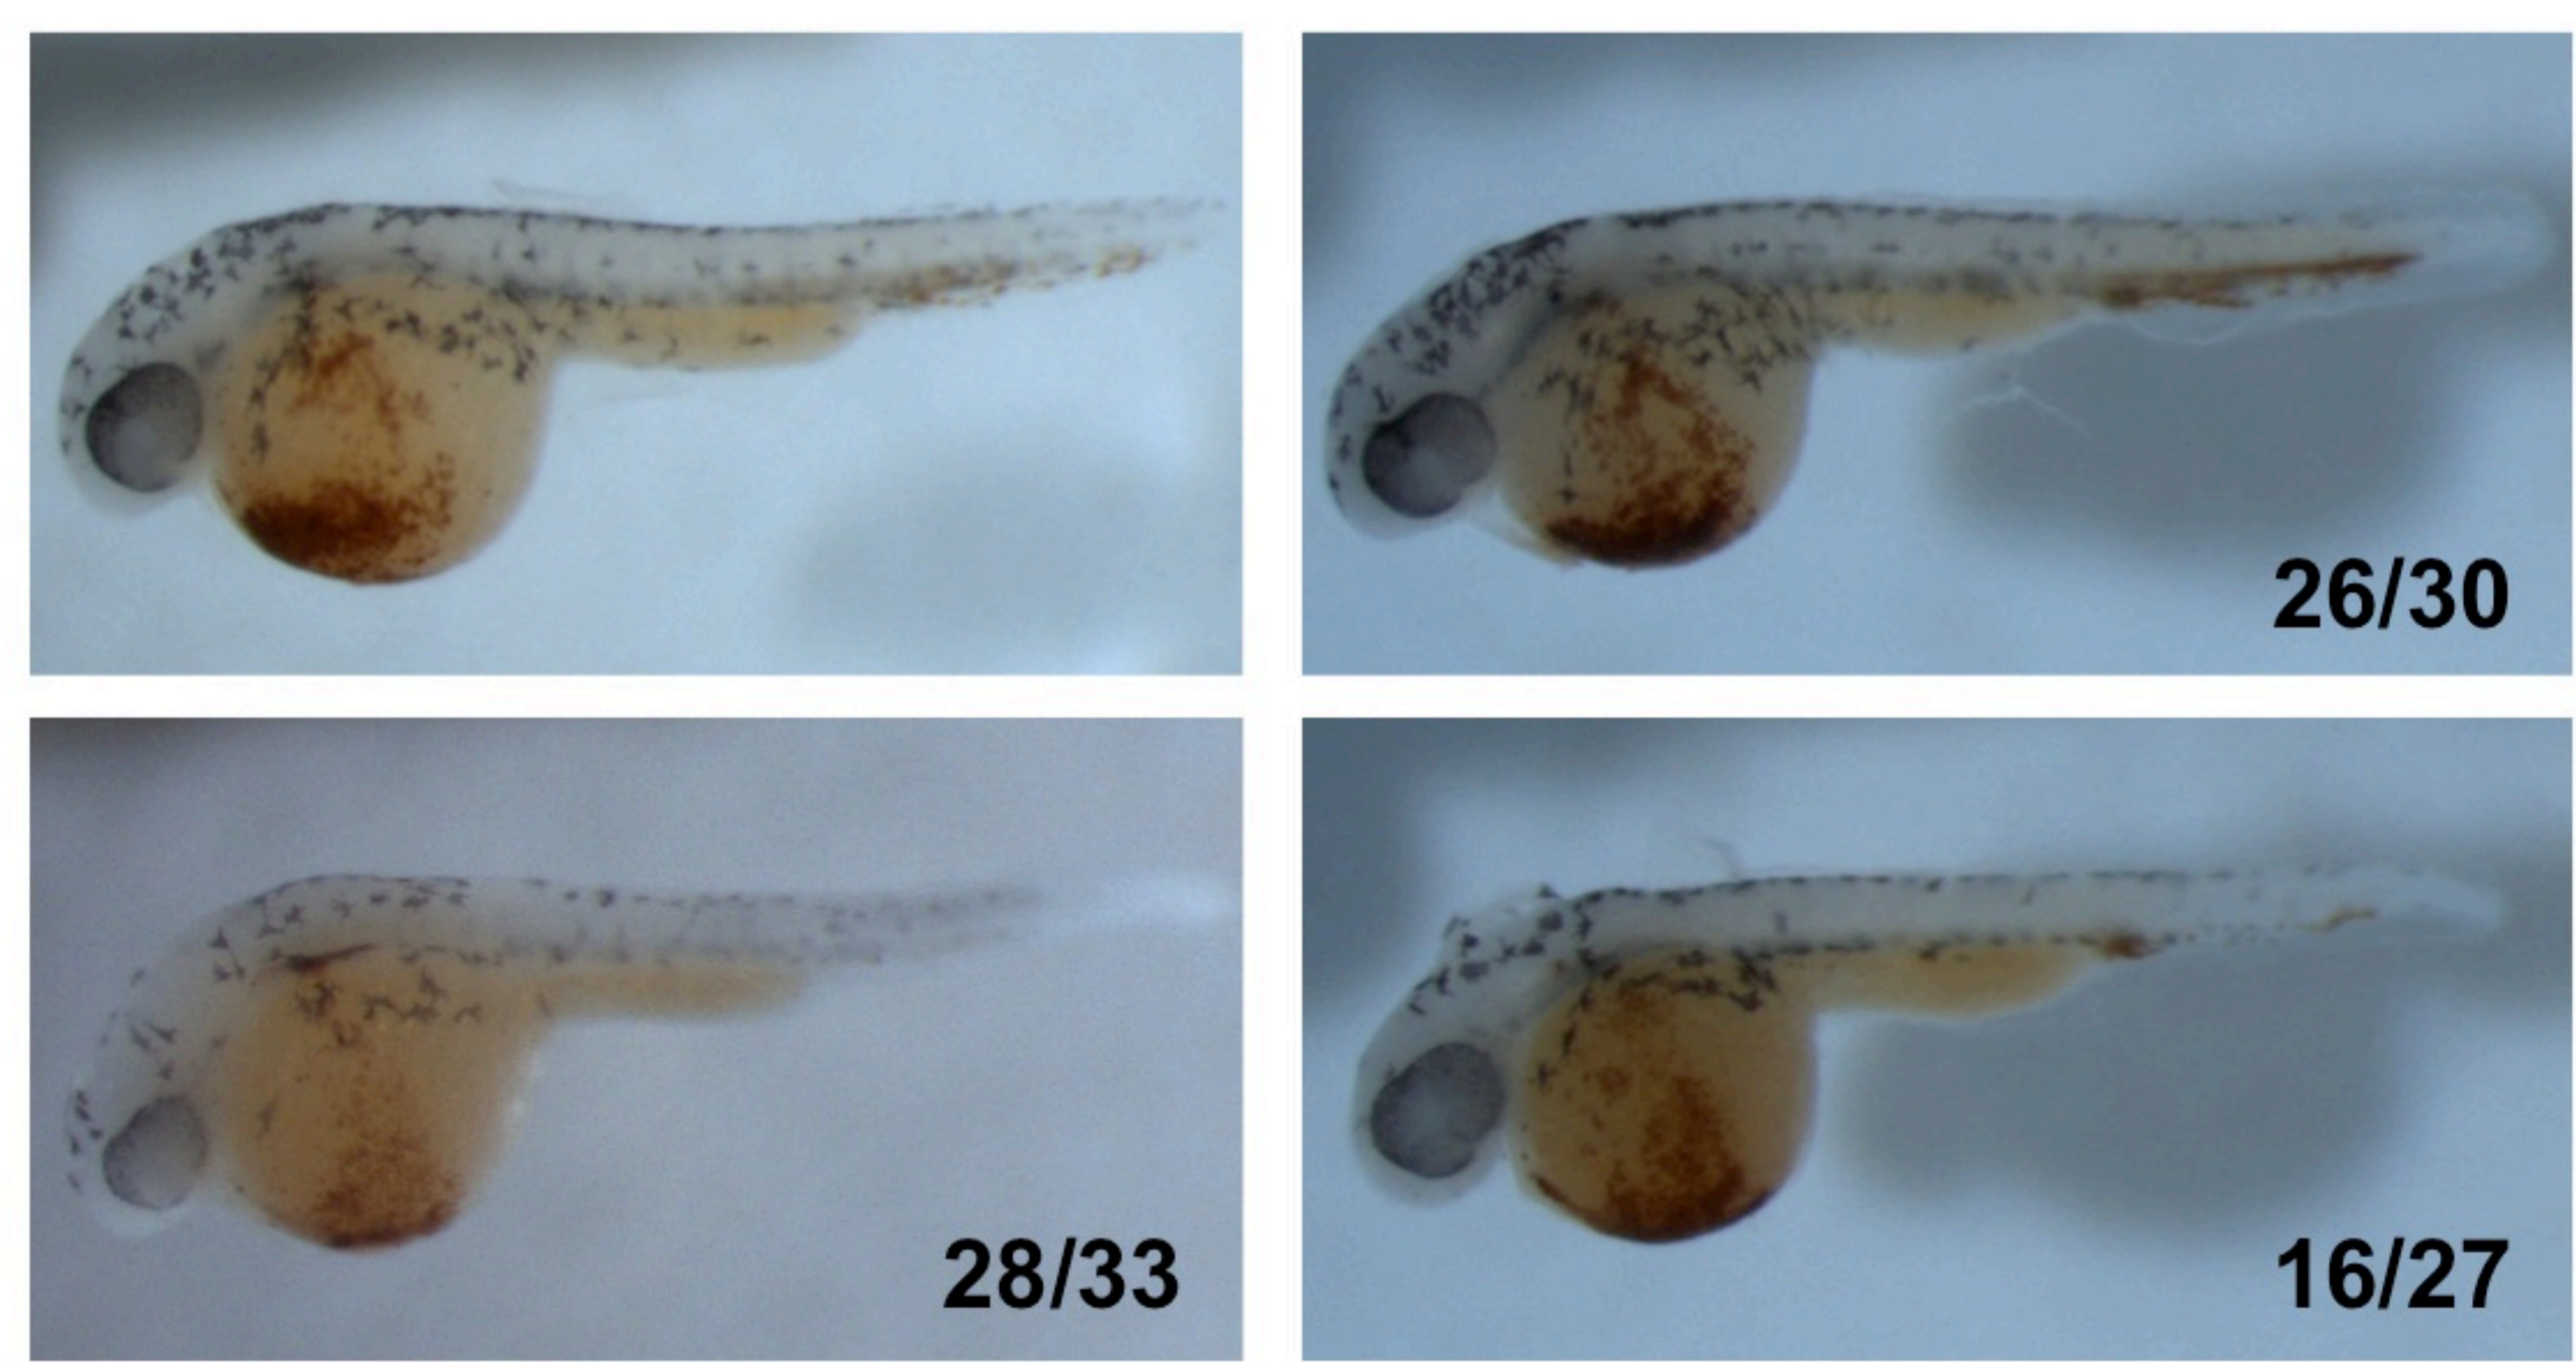

O-dianisidine at 36hpf

**G****Uninjected****VEGFaa MO**Control  
Glucose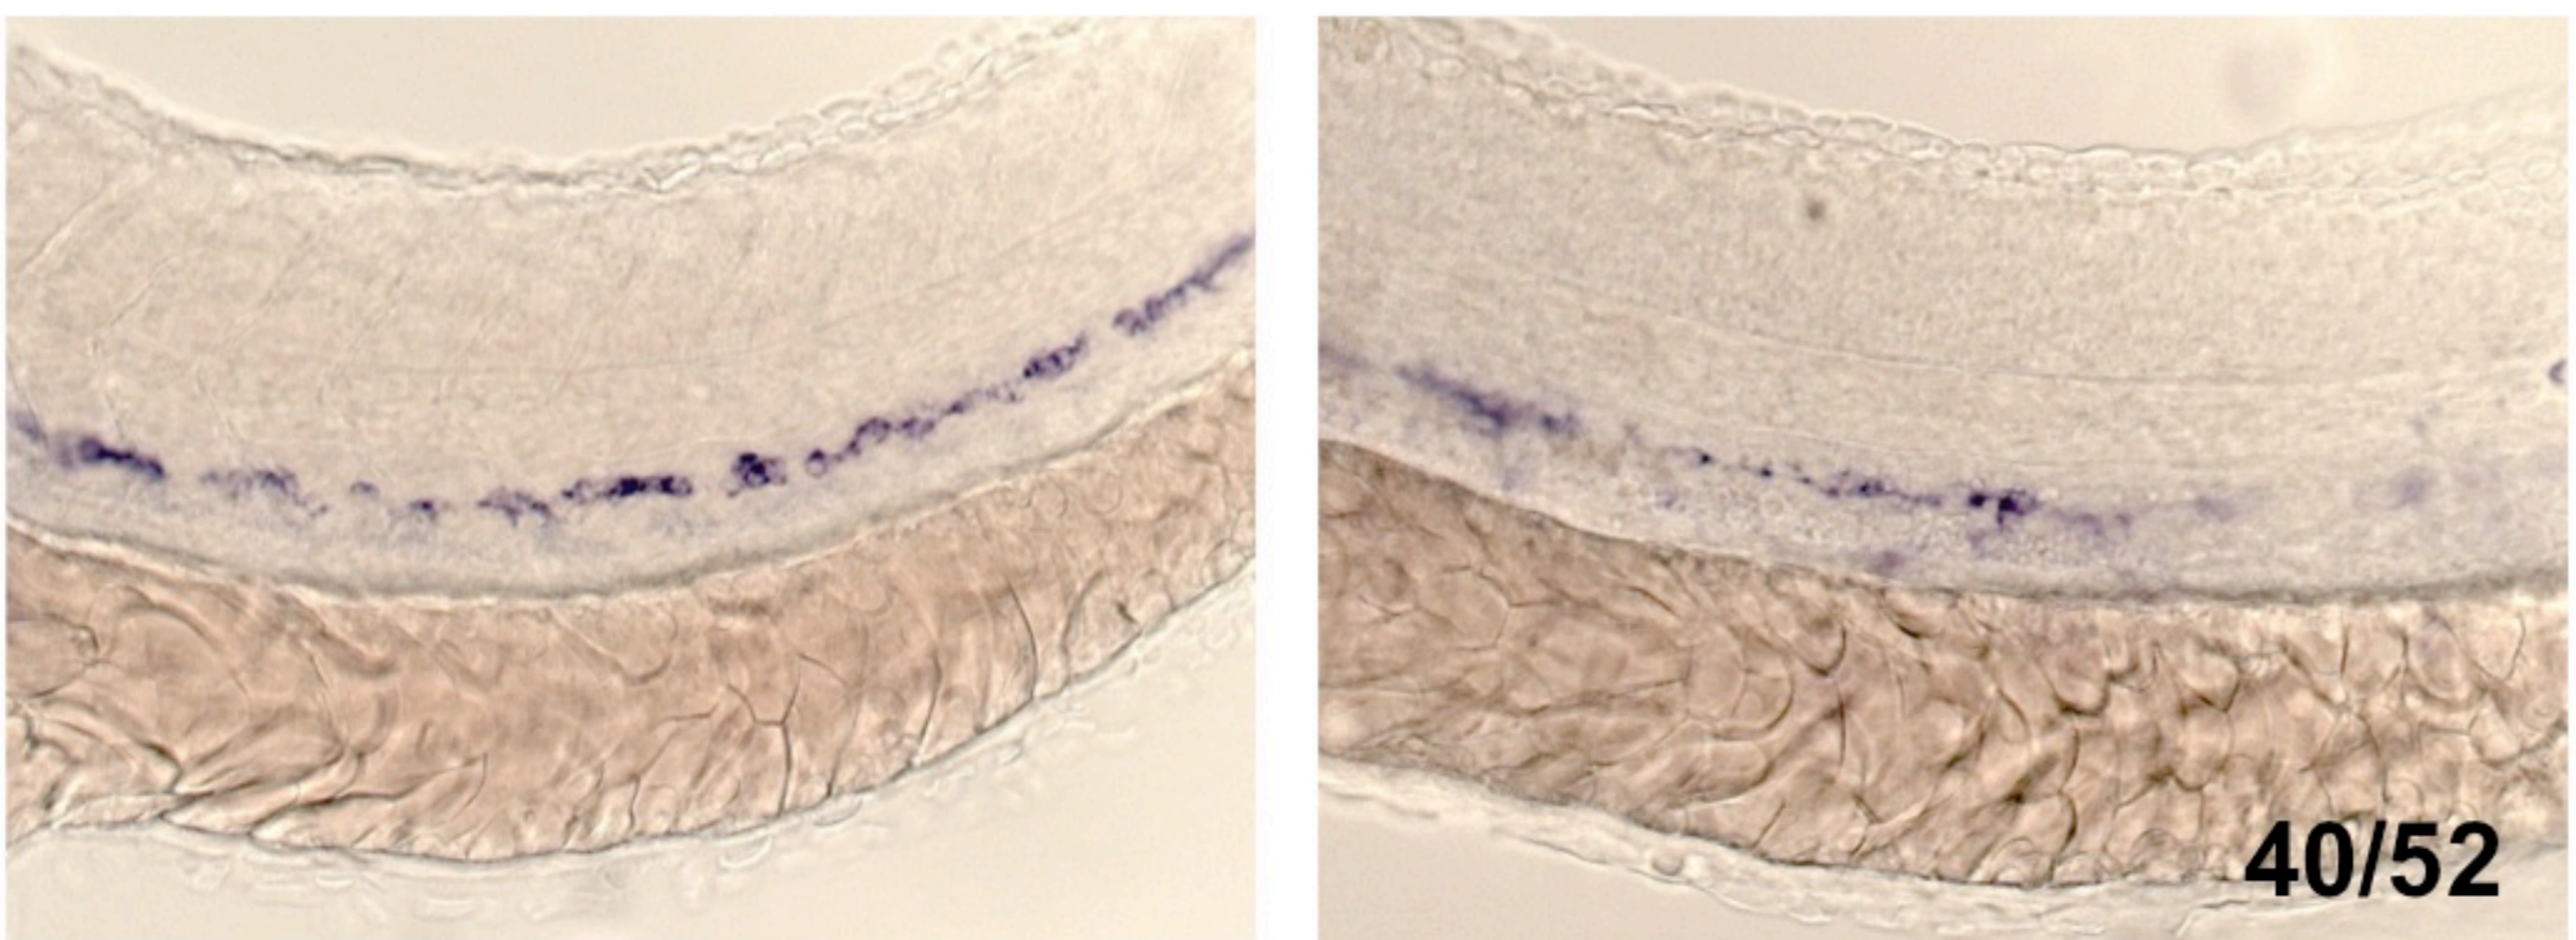*runx1/cmyb* at 36hpf**Uninjected****VEGFaa MO**

Glucose

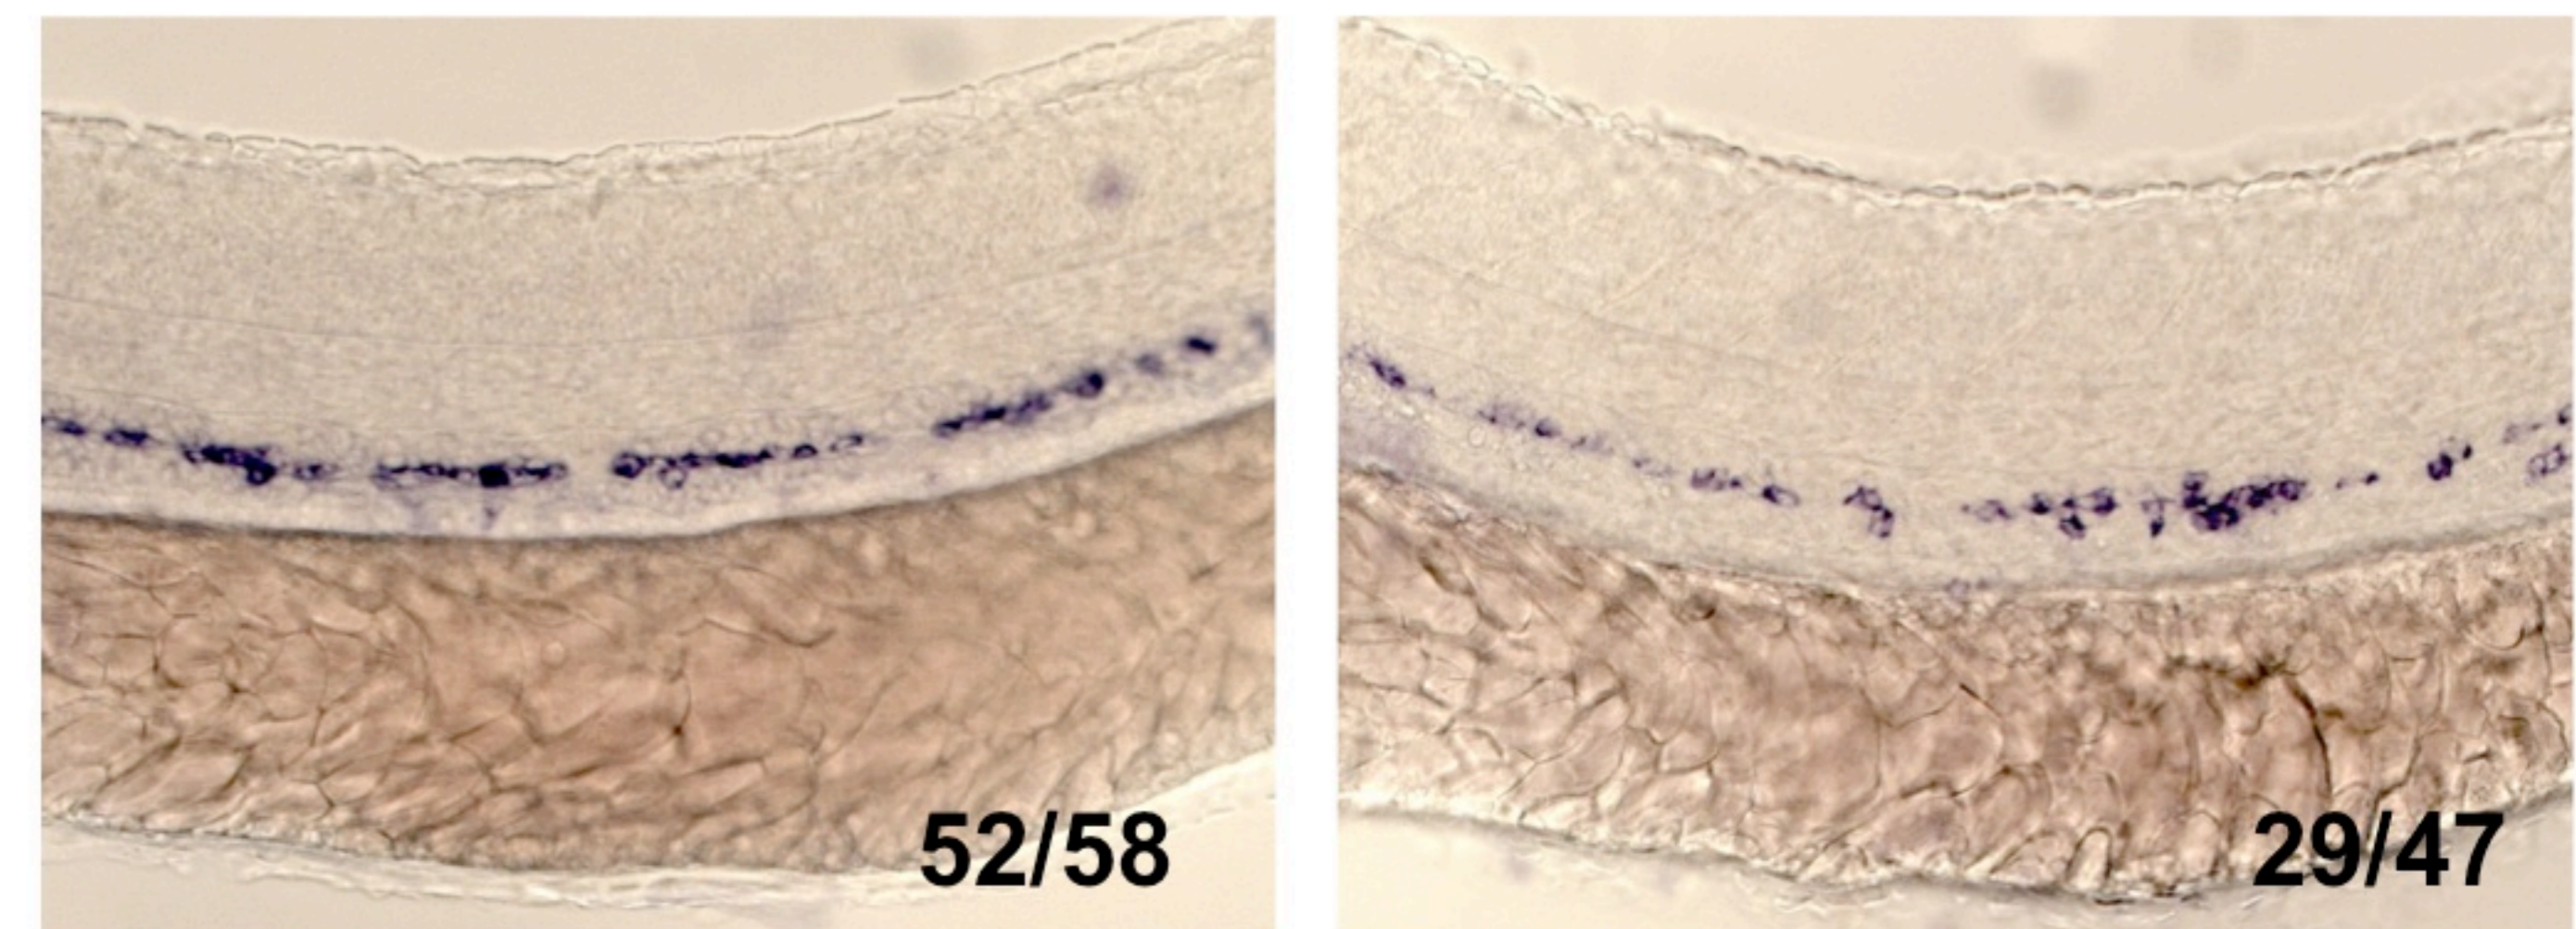

## Supplemental Methods Table 1

| Compound                                               | Mechanism of Action                                         | Concentration | Citation                      |
|--------------------------------------------------------|-------------------------------------------------------------|---------------|-------------------------------|
| lonidamine                                             | hexokinase inhibitor                                        | 10 $\mu$ M    | (Floridi and Lehninger, 1983) |
| ethyl bromopyruvate                                    | hexokinase II inhibitor                                     | 20 $\mu$ M    | (Ko et al., 2001)             |
| potassium cyanide (KCN)                                | complex IV inhibitor                                        | 100 $\mu$ M   | (Nicholls et al., 1972)       |
| oxaloacetic acid (OAA)                                 | complex II inhibitor                                        | 50 $\mu$ M    |                               |
| N-Acetylcysteine (NAC)                                 | antioxidant                                                 | 10 $\mu$ M    |                               |
| MitoQ                                                  | antioxidant                                                 | 10 $\mu$ M    | (Kelso et al., 2001)          |
| Vitamin C                                              | vitamin, antioxidant                                        | 750 $\mu$ M   |                               |
| Euk134                                                 | SOD mimetic                                                 | 500 $\mu$ M   | (Rong et al., 1999)           |
| propylthiouracil (PTU)                                 | oxidant                                                     | 0.003%        | (Yu et al., 2010)             |
| 2,4-Dinitrochlorobenzene (DNCB)                        |                                                             | 0.5 $\mu$ M   | (Iijima et al., 2003)         |
| L-buthionine sulphonimine (BSO)                        | GSH reductant                                               | 500 $\mu$ M   | (Griffith, 1982)              |
| N,N'-dimethyl-4, 4'-bipyridinium dichloride (Paraquat) | insecticide,                                                | 500 $\mu$ M   | (Bus and Gibson, 1984)        |
| Colbalt Chloride (CoCl <sub>2</sub> )                  | Hypoxia mimetic (directly binds hif1a to prevent breakdown) | 500 $\mu$ M   | (Wang and Semenza, 1993)      |
| Dimethyloxallyl Glycine (DMOG)                         | Competitive inhibitor of hif1a prolyl hydroxylase           | 50 $\mu$ M    | (Jaakkola et al., 2001)       |

### References:

Bus, J.S., and Gibson, J.E. (1984). Paraquat: model for oxidant-initiated toxicity. *Environ Health Perspect* 55, 37-46.

Floridi, A., and Lehninger, A.L. (1983). Action of the antitumor and antispermatogenic agent lonidamine on electron transport in Ehrlich ascites tumor mitochondria. *Arch Biochem Biophys* 226, 73-83.

Griffith, O.W. (1982). Mechanism of action, metabolism, and toxicity of buthionine sulfoximine and its higher homologs, potent inhibitors of glutathione synthesis. *J Biol Chem* 257, 13704-13712.

Iijima, N., Yanagawa, Y., and Onoe, K. (2003). Role of early- or late-phase activation of p38 mitogen-activated protein kinase induced by tumour necrosis factor-alpha or 2,4-dinitrochlorobenzene during maturation of murine dendritic cells. *Immunology* 110, 322-328.

Jaakkola, P., Mole, D.R., Tian, Y.M., Wilson, M.I., Gielbert, J., Gaskell, S.J., Kriegsheim, A., Hebestreit, H.F., Mukherji, M., Schofield, C.J., *et al.* (2001). Targeting of HIF-alpha to the von Hippel-Lindau ubiquitylation complex by O2-regulated prolyl hydroxylation. *Science* 292, 468-472.

Kelso, G.F., Porteous, C.M., Coulter, C.V., Hughes, G., Porteous, W.K., Ledgerwood, E.C., Smith, R.A., and Murphy, M.P. (2001). Selective targeting of a redox-active ubiquinone to mitochondria within cells: antioxidant and antiapoptotic properties. *J Biol Chem* 276, 4588-4596.



Ko, Y.H., Pedersen, P.L., and Geschwind, J.F. (2001). Glucose catabolism in the rabbit VX2 tumor model for liver cancer: characterization and targeting hexokinase. *Cancer Lett* 173, 83-91.

Nicholls, P., van Buuren, K.J., and van Gelder, B.F. (1972). Biochemical and biophysical studies on cytochrome aa 3 . 8. Effect of cyanide on the catalytic activity. *Biochim Biophys Acta* 275, 279-287.

Rong, Y., Doctrow, S.R., Tocco, G., and Baudry, M. (1999). EUK-134, a synthetic superoxide dismutase and catalase mimetic, prevents oxidative stress and attenuates kainate-induced neuropathology. *Proc Natl Acad Sci U S A* 96, 9897-9902.

Wang, G.L., and Semenza, G.L. (1993). General involvement of hypoxia-inducible factor 1 in transcriptional response to hypoxia. *Proc Natl Acad Sci U S A* 90, 4304-4308.

Yu, D., dos Santos, C.O., Zhao, G., Jiang, J., Amigo, J.D., Khandros, E., Dore, L.C., Yao, Y., D'Souza, J., Zhang, Z., *et al.* (2010). miR-451 protects against erythroid oxidant stress by repressing 14-3-3zeta. *Genes Dev* 24, 1620-1633.

## Supplemental Methods Table 2

| <b>MO</b>              | <b>Sequence</b>           | <b>Reference</b>          |
|------------------------|---------------------------|---------------------------|
| <i>glut1 (slc2a1a)</i> | GGCCATCATCAGCTGAGGAGTCACC | (Jensen et al., 2010)     |
| <i>insra</i>           | CGCGGTAAAGCCGAAAATCGTCCA  | (Toyoshima et al., 2008)  |
| <i>insrb</i>           | CGCGACACGTTTTGGTTTCCTTGGA | (Toyoshima et al., 2008)  |
| <i>prdx1-ATG</i>       | AGCTGCCATTTTCTTGAAGTGTCTT | not previously published  |
| <i>hif1ab</i>          | ACCCTACAAAAGAAAGAAGGAGAGC | (Mendelsohn et al., 2008) |
| <i>vhl-ATG</i>         | GGCATCGTCAAAGACAGGACAGTTC | not previously published  |
| <i>vegfa</i>           | GTATCAAATAAACAACCAAGTTCAT | (Nasevicius et al., 2000) |

### Supplemental References:

Jensen, P.J., Gunter, L.B., and Carayannopoulos, M.O. (2010). Akt2 modulates glucose availability and downstream apoptotic pathways during development. *J Biol Chem* 285, 17673-17680.

Mendelsohn, B.A., Kassebaum, B.L., and Gitlin, J.D. (2008). The zebrafish embryo as a dynamic model of anoxia tolerance. *Dev Dyn* 237, 1780-1788.

Nasevicius, A., Larson, J., and Ekker, S.C. (2000). Distinct requirements for zebrafish angiogenesis revealed by a VEGF-A morphant. *Yeast* 17, 294-301.

Toyoshima, Y., Monson, C., Duan, C., Wu, Y., Gao, C., Yakar, S., Sadler, K.C., and LeRoith, D. (2008). The role of insulin receptor signaling in zebrafish embryogenesis. *Endocrinology* 149, 5996-6005.

**Supplemental Methods Table 3**

| <b>Gene</b>    | <b>Forward</b>            | <b>Reverse</b>             |
|----------------|---------------------------|----------------------------|
| <i>b-actin</i> | TCTGTCCCATGCCAACCAT       | TGCCCTCGTGCTGTTTT          |
| <i>runx1</i>   | CGTCTTCACAAACCCTCCTCAA    | GCTTTACTGCTTCATCCGGCT      |
| <i>cmyb</i>    | TGATGCTTCCCAACACAGAG      | TTCAGAGGGAATCGTCTGCT       |
| <i>CD41</i>    | CTGAAGGCAGTAACGTCAAC      | TCCTTCTTCTGACCACACAC       |
| <i>flk1</i>    | CGAACGTGAAGTGACATACGG     | CCCTCTACCAAACCATGTGAAA     |
| <i>tie2</i>    | TGGAGGAGCGCAAGACATATG     | CATTATTGCTGCAGTGCATCAG     |
| <i>lmo2</i>    | AAACACTGGAGGCAAATGAGGA    | AGAAAGAAGCGGTCTCCGATG      |
| <i>ve-cad</i>  | ACACAAGATCCACACGCTGG      | GAACATACTCAGGAGCGTG        |
| <i>scl</i>     | CTCGAATGGTGCAGTTGAGTCC    | GCATCTCCAGCAAACCCTGT       |
| <i>gata1</i>   | TGAATGTGTGAATTGTGGTG      | ATTGCGTCTCCATAGTGTTG       |
| <i>globin</i>  | TGGTTGTGTGGACAGACTTCGA    | CGATAAGACACCTTGCCAGAGC     |
| <i>lysc</i>    | GTGAAAATGGACGGGCTGAA      | CTTTGTTTGCGCTGCTCACA       |
| <i>mpo</i>     | TGATGTTTGGTTAGGAGGTG      | GAGCTGTTTTCTGTTTGGTG       |
| <i>rag2</i>    | ACGCTCATGTCCAACCTGGGATA   | CTCTGCTGTCTACGCTCAACATGTA  |
| <i>lck</i>     | AGATGAATGGTGTGACCAGTGTA   | GATCCTGTAGTGCTTGATGATGT    |
| <i>hk</i>      | CAACAACGCCACCGTCAAATG     | GCCCAGATCCAATGCCAAGAAA     |
| <i>pflk</i>    | CGACAGGAACTTCGGCACTA      | CCAATCACACATGCCGTATC       |
| <i>plkr</i>    | TAGAGGCCGTGGCCATGAT       | GAGTCAAGCGCCGCAACT         |
| <i>pgk1</i>    | AGGAGGGCAAGGGCAAAG        | CAGGGAGGCTCGGAAAGC         |
| <i>pdk2</i>    | CGAATTAGCCAATAAACCAACAAA  | CACACTTCACCTGCATTTCCA      |
| <i>g6pd</i>    | GTCCCGAAAGGCTCCACTC       | CCTCCGCTTTCCTCTC           |
| <i>ldha</i>    | GGCTATGGACTTGCAGCA        | CTTTTGAGTTTGCGGTCAC        |
| <i>glut1</i>   | CCATTTCTCCTGGGCTTTACCTTTA | CAGATTTGGCTTTGCTTTCCTCGTT  |
| <i>phd3</i>    | AAAAACTGGAATGCCAAGGA      | CGTAAGGTTTCCCTTCAGGA       |
| <i>epo</i>     | CGCGTCCTCGACCATTTC        | TGCAATCGTCCTTACAAGTTCTCA   |
| <i>epoR</i>    | GTCAGATACGCTGTGGAGGA      | TCACAGGACTGGTCCAAGAA       |
| <i>tfr</i>     | AATCGCATTATGAGGGTGGAA     | GGGAGACACGTATGGAGAGAGC     |
| <i>tf</i>      | TTACATGGGAGGGTCTTAATGAG   | GGACACAACCTGCTCGAGAAGAA    |
| <i>vegf</i>    | CAGCTGTCAAGAGTGCCTACATAC  | CATCAGGGTACTCCTGCTGAATTTT  |
| <i>flt</i>     | ATCATCTGGCTGAAGGATGG      | AGGACACGCTCTTCTCTCCA       |
| <i>angpt1</i>  | CGCAGCCTCCTCAGCCTCTGTGCTA | CGATGTGGAAGCTGTCGTAAGTA    |
| <i>angpt2</i>  | CACAGTGGCTGCAGAAGCTGGAGAG | CTGGAGTGGATATATCGTTACAG    |
| <i>ephrin</i>  | CCCACAAGAAATCCTCCAAA      | ACTCTTCCCTCCGGATTCTC       |
| <i>tpo</i>     | ACCTGGCTGTGGACTCACTC      | TTTGCCATCTCTGCAATGAG       |
| <i>nos1</i>    | CTCCATTCAGAGCCTTCTGG      | CCGACAACCAACACCAAG         |
| <i>nos2</i>    | GGGAAGACAAGCACAAACCAC     | CGATGAAATCCTCTGCCTG        |
| <i>cxcr4</i>   | TGTACAGCAGCGTCCTCATC      | ACCCAGGTGACAAACGAGTC       |
| <i>igf1</i>    | GTCTAGCGGTCATTTCTTCCA     | ATCTGGCATCACACCTTCTACAAC   |
| <i>igf2</i>    | GAGTCCCATCCATTCTGTG       | TCCTTTGTTTGTGTCATTTG       |
| <i>pdgfb</i>   | GGACCCTCTTCCCTCCATCTC     | TGGGACACGTAACCTGACAGC      |
| <i>hif1a</i>   | CCATGAAGAGTTGAGAGAGATGCT  | CTCTGTGTTTTGTTCCCTTGGTCTTT |
| <i>hif2a</i>   | ACGATAACTATCCAGCTTTAACACA | CGACCGTGAGCGGGTTTA         |
